# Supplementary material
Source: PubMed Central journal article supplement (PMC2566745)

## Supporting Information

# Synthetic and Biosynthetic Studies of FR900482 and Mitomycin C: An Efficient and Stereoselective Hydroxymethylation of an Advanced Benzazocane Intermediate

Hidenori Namiki, Stephen Chamberland, Daniel A. Gubler, and Robert M. Williams\*

Department of Chemistry,  
Colorado State University  
Fort Collins, CO 80523-1872  
Email: rmw@lamar.colostate.edu

### Table of Contents

|     |                                                                                                                                                                            |
|-----|----------------------------------------------------------------------------------------------------------------------------------------------------------------------------|
| S1  | General Experimental Methods                                                                                                                                               |
| S1  | Experimental procedures for the synthesis of compounds <b>6-8</b> , <b>10a</b> , <b>11</b> , <sup>13</sup> C- <b>11</b> , epimerized <b>11</b> , <b>13</b> , and <b>14</b> |
| S7  | X-ray Crystallographic Data for Compound <b>8</b>                                                                                                                          |
| S15 | Details of Computational Experiments                                                                                                                                       |
| S32 | References                                                                                                                                                                 |
| S33 | NMR spectra for selected compounds                                                                                                                                         |

**General Experimental Methods.** Unless otherwise noted, all reagents were obtained from commercial suppliers and used as received. All air or moisture sensitive reactions were performed under a positive pressure of argon in glassware that had been flame-dried and cooled under a stream of argon. Tetrahydrofuran (THF), dichloromethane (CH<sub>2</sub>Cl<sub>2</sub>), acetonitrile (MeCN), triethylamine (Et<sub>3</sub>N), toluene, diethyl ether (Et<sub>2</sub>O), and *N,N*-dimethylformamide (DMF) were obtained from a dry solvent system (activated alumina columns, positive pressure of argon, according to the method of Grubbs<sup>1</sup>). Column chromatography was performed using Merck silica gel 60 (230-400 mesh). Melting points were determined in open-ended capillary tubes and are uncorrected. <sup>1</sup>H NMR and <sup>13</sup>C NMR spectra were recorded on Varian 300, 400, or 500 MHz spectrometers. Chemical shifts are reported in ppm relative to CHCl<sub>3</sub> at δ 7.27 (<sup>1</sup>H NMR) and δ 77.23 (<sup>13</sup>C NMR) or tetramethylsilane (TMS) δ 0.00 where noted. Mass spectra were obtained on Fisons VG Autospec. IR spectra were obtained from thin films on a NaCl plate using a Perkin-Elmer 1600 series FT-IR spectrometer. Optical rotations were collected at 589 nm on a Rudolph Research Automatic Polarimeter Autopol III.

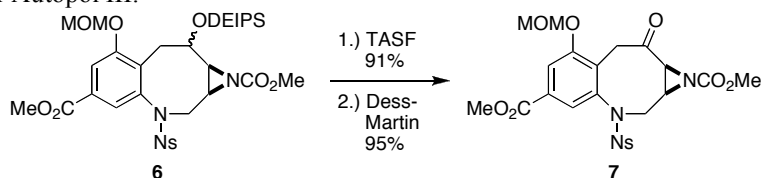

**Compound 6.** The benzazocane **9**<sup>2</sup> (500 mg, 0.736 mmol, 1.0 equiv) was dissolved with DMF (7.0 mL) and H<sub>2</sub>O (0.70 mL) in a 50 mL round-bottomed flask. To the solution was added tris(dimethylamino)sulfur (trimethylsilyl) difluoride (TASF) (406 mg, 1.47 mmol, 2.0 equiv) at room temperature. After stirring for 3 h at room temperature, saturated aqueous NH<sub>4</sub>Cl was added and the mixture was extracted with EtOAc×5. The combined organic extracts were washed with brine, dried over anhydrous Na<sub>2</sub>SO<sub>4</sub>, filtered, and concentrated *in vacuo*. The residue was purified by silica gel column chromatography (EtOAc) to give the corresponding secondary alcohol as a pale yellow oil (370 mg, 91%). Major diastereomer: [α]<sub>D</sub><sup>20</sup> -30.5 (*c* 1.90, CHCl<sub>3</sub>); <sup>1</sup>H NMR (300 MHz, DMSO-*d*<sub>6</sub>, 373K) δ 7.90-7.93 (1H, m), 7.85-7.74 (3H, m), 7.65 ((1/3)H, d, *J* = 1.5 Hz), 7.63 ((2/3)H, dt, *J* = 1.5 Hz), 7.30 ((1/3)H, d, *J* = 1.5 Hz), 7.07 ((2/3)H, d, *J* = 1.5 Hz), 5.30 (1H, s), 4.25 (1H, dd, *J* = 14.5, 5.5 Hz), 4.20-4.14 (1H, m), 4.00 (1H, dd, *J* = 14.5, 2.5 Hz), 3.82 ((1/5)3H, s), 3.78 ((4/5)3H, s), 3.70 ((1/5)3H, s), 3.66 ((4/5)3H, s), 3.46 ((4/5)3H, s), 3.44

((1/5)3H, s), 3.02–2.92 (3H, m), 2.70–2.61 (2H, m);  $^{13}\text{C}$  NMR (100 MHz,  $\text{CDCl}_3$ ) (note: at room temperature, this compound exists as an equilibrating mixture of conformational isomers on the NMR time scale)  $\delta$  165.4, 163.2, 155.8, 147.8, 138.9, 134.0, 133.6, 132.3, 131.3, 130.0, 124.2, 124.0, 115.0, 94.4, 56.4, 54.0, 52.2, 45.9, 41.5, 36.4, 29.2; IR (neat) 3420, 2955, 1724, 1671, 1545, 1437, 1298, 1243, 1168, 732  $\text{cm}^{-1}$ ; HRMS (FAB)  $m/z$  calcd for  $\text{C}_{23}\text{H}_{26}\text{N}_3\text{O}_{11}\text{S}$  ( $\text{M} + \text{H}$ ) $^+$  552.1283, found 552.1288.

The secondary alcohols (370 mg, 0.672 mmol, 1.0 equiv) were dissolved in  $\text{CH}_2\text{Cl}_2$  (7.0 mL) in a 50 mL round-bottomed flask. To the solution was added Dess-Martin periodinane (427 mg, 1.01 mmol, 1.5 equiv) at room temperature. After stirring for 45 min,  $\text{Et}_2\text{O}$  (21 mL) and a solution of 1.4 g of  $\text{Na}_2\text{S}_2\text{O}_3 \cdot 5\text{H}_2\text{O}$  in saturated aqueous  $\text{NaHCO}_3$  (21 mL) were added to the reaction mixture. The resulting mixture was stirred vigorously at room temperature until both phases appeared transparent. The layers were separated, and the aqueous layer was extracted with  $\text{EtOAc} \times 3$ . The combined organic layers were washed with brine, dried over anhydrous  $\text{Na}_2\text{SO}_4$ , filtered, and concentrated *in vacuo*. The resulting oil was purified by silica gel column chromatography (1:3 hexane/ $\text{EtOAc}$ ) to give the ketone **6** as a colorless oil (351 mg, 95%) (note: at room temperature, this compound exists as an equilibrating mixture of conformational isomers on the NMR time scale). Major diastereomer:  $[\alpha]_{\text{D}}^{20} -37.6$  ( $c$  0.40,  $\text{CHCl}_3$ );  $^1\text{H}$  NMR (300 MHz,  $\text{DMSO}-d_6$ , 373K):  $\delta$  7.97–7.87 (3H, m), 7.83–7.74 (2H, m), 7.69 (1H, d,  $J = 1.5$  Hz), 6.93 (1H, s), 5.34 (1H, d,  $J = 6.5$  Hz), 5.30 (1H, d,  $J = 6.5$  Hz), 4.34–4.23 (1H, m), 4.04 (1H, br s), 3.98 (1H, br s), 3.78 (3H, s), 3.84–3.73 (1H, m), 3.61 (3H, s), 3.47 (3H, s), 3.38 (1H, d,  $J = 7.0$  Hz), 3.20–3.14 (1H, br s);  $^{13}\text{C}$  NMR (100 MHz,  $\text{CDCl}_3$ ) (note: at room temperature, this compound exists as an equilibrating mixture of conformational isomers on the NMR time scale)  $\delta$  200.0, 165.3, 165.0, 161.8, 161.2, 155.8, 153.9, 148.1, 147.9, 138.3, 138.2, 136.1, 134.5, 134.4, 134.2, 133.0, 132.6, 131.6, 131.2, 131.0, 130.7, 129.7, 129.2, 124.1, 123.9, 122.3, 116.4, 115.3, 94.7, 94.2, 56.5, 56.3, 54.1, 53.8, 53.4, 52.2, 51.1, 48.6, 46.7, 45.4, 42.5, 42.1, 35.2; IR (neat) 3096, 3002, 2955, 1716, 1582, 1547, 1437, 1290, 1014, 730  $\text{cm}^{-1}$ ; MS:  $m/z = 550$  (12), 307 (28), 154 (100), 137 (73); HRMS (FAB)  $m/z$  calcd for  $\text{C}_{23}\text{H}_{24}\text{N}_3\text{O}_{11}\text{S}$  ( $\text{M} + \text{H}$ ) $^+$  550.1126, found 550.1138.

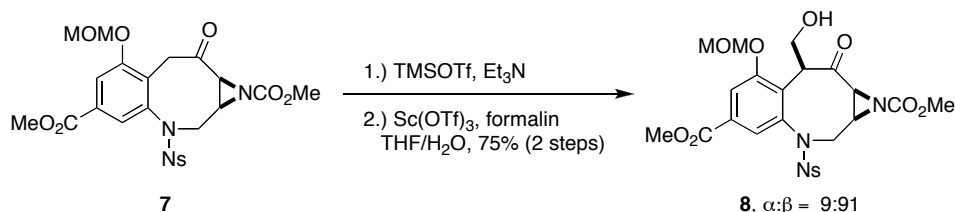

**Compound 7.** The ketone **6** (96.9 mg, 0.177 mmol, 1.0 equiv) was dissolved in  $\text{CH}_2\text{Cl}_2$  (1.8 mL) in a 25 mL round-bottomed flask. To the solution were added  $\text{Et}_3\text{N}$  (61.5  $\mu\text{L}$ , 0.441 mmol, 2.5 equiv) and TMSOTf (63.9  $\mu\text{L}$ , 0.353 mmol, 2.0 equiv) dropwise by syringe at room temperature. After stirring for 2 h, the reaction mixture was passed through a short column of activated, neutral alumina using hexane- $\text{EtOAc}$  (1 : 3) as the eluent, and the combined filtrates were concentrated *in vacuo*. The resulting crude silyl enol ether (105 mg) was dissolved in a mixture of  $\text{THF}/\text{H}_2\text{O}$  (9:1, v/v) (0.56 mL) in a 10 mL round-bottomed flask. To the solution was added 37% aqueous formaldehyde solution (68.5  $\mu\text{L}$ , 0.845 mmol, 5.0 equiv.) containing  $\text{Sc(OTf)}_3$  (8.3 mg, 0.0169 mmol, 0.1 equiv) at room temperature. After stirring for 3.5 h, brine was added to the reaction mixture. The layers were separated, and the aqueous portion was extracted with  $\text{CH}_2\text{Cl}_2 \times 4$ . The combined organic layers were washed with brine, dried over anhydrous  $\text{Na}_2\text{SO}_4$ , filtered, and concentrated *in vacuo*. The residue was purified by silica gel column chromatography (30:1  $\text{CH}_2\text{Cl}_2/\text{MeOH}$ ) to give the hydroxymethyl ketone (**7**) as a colorless oil (76.6 mg, 75%, 2 steps,  $\alpha : \beta = 9 : 91$ ):  $^1\text{H}$  NMR (300 MHz,  $\text{CDCl}_3$ )  $\delta$  TMS 7.92 (1H, br s) 7.87–7.81 (1H, m), 7.68–7.64 (3H, m), 7.12 (1H, d,  $J = 1.3$  Hz), 5.45 (1H, d,  $J = 7.1$  Hz), 5.41 (1H, d,  $J = 7.1$  Hz), 4.67 (1H, dd,  $J = 11.2, 8.8$  Hz), 4.52 (1H, dd,  $J = 8.8, 3.1$  Hz), 4.32 (1H, dd,  $J = 13.7, 2.9$  Hz), 3.93 (1H, dd,  $J = 13.7, 6.0$  Hz), 3.89 (3H, s), 3.75 (3H, s), 3.80–3.71 (1H, m), 3.60 (3H, s), 3.31 (1H, d,  $J = 7.1$  Hz), 2.98 (1H, br s), 2.80 (1H, ddd,  $J = 7.1, 6.0, 2.9$  Hz);  $^{13}\text{C}$  NMR (125 MHz,  $\text{CDCl}_3$ )  $\delta$  200.1, 165.2, 162.2, 156.6, 149.2, 137.8, 135.2, 132.8, 132.6, 132.0, 131.5, 129.9, 124.3, 123.0, 115.9, 95.0, 61.8, 57.1, 54.3, 52.8, 52.3, 51.9, 45.6, 40.6; IR (neat) 3545, 2955, 2253, 1724, 1578, 1547, 1438, 1375, 1289, 1223, 1174, 1016, 730  $\text{cm}^{-1}$ ; HRMS (FAB)  $m/z$  calcd for  $\text{C}_{24}\text{H}_{26}\text{N}_3\text{O}_{12}\text{S}$  ( $\text{M} + \text{H}$ ) $^+$  580.1232, found 550.1246.

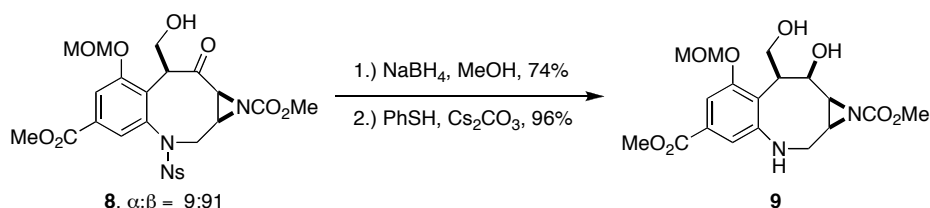

**Compound 8.** The hydroxymethylated ketone **7** (21.8 mg, 0.0377 mmol, 1.0 equiv) was dissolved with MeOH (0.5 mL) in a 10 mL round-bottomed flask. To the solution was added NaBH<sub>4</sub> (1.4 mg, 0.0377 mmol, 1.0 equiv) at 0 °C. After stirring for 30 min at 0 °C, saturated aqueous NH<sub>4</sub>Cl was added. The layers were separated, and the aqueous portion was extracted with CH<sub>2</sub>Cl<sub>2</sub>×5. The combined organic layers were washed with brine, dried over anhydrous Na<sub>2</sub>SO<sub>4</sub>, filtered, and concentrated *in vacuo*. The residue was purified by silica gel column chromatography (30:1 CH<sub>2</sub>Cl<sub>2</sub>/MeOH) to give the corresponding diol as a colorless oil (16.2 mg, 74%) (note: at room temperature, this compound exists as an equilibrating mixture of conformational isomers on the NMR time scale). [ $\alpha$ ]<sub>D</sub><sup>20</sup> +20.4 (*c* 1.00, CHCl<sub>3</sub>); Major rotamer: <sup>1</sup>H NMR (300 MHz, CDCl<sub>3</sub>)  $\delta$  TMS: 7.56–7.80 (5H, m), 7.02 (1H, d, *J* = 1.5 Hz), 5.32 (2H, s), 4.97 (1H, dd, *J* = 2.9, 2.6 Hz), 4.55 (1H, dd, *J* = 10.7, 10.3 Hz), 4.31 (1H, dd, *J* = 13.2, 4.8 Hz), 4.15–4.22 (1H, m), 4.12 (1H, dd, *J* = 13.2, 7.0 Hz), 3.87–3.92 (1H, m), 3.83 (3H, s), 3.70 (3H, s), 3.53 (3H, s), 2.77 (1H, s), 2.45 (1H, dd, *J* = 6.6, 2.6 Hz), 2.38 (1H, ddd, *J* = 7.0, 6.6, 4.8 Hz), 2.09 (1H, s). Minor rotamer: <sup>1</sup>H NMR (300 MHz, CDCl<sub>3</sub>)  $\delta$  TMS: 7.80–7.56 (5H, m), 7.07 (1H, d, *J* = 1.5 Hz), 5.26 (1H, d, *J* = 6.6 Hz), 5.22 (1H, d, *J* = 6.6 Hz), 4.86 (1H, dd, *J* = 15.4, 5.5 Hz), 4.62–4.58 (1H, m), 4.39 (1H, dd, *J* = 11.7, 9.2 Hz), 4.10 (1H, dd, *J* = 11.7, 5.1 Hz), 4.02–3.97 (1H, m), 3.79 (3H, s), 3.74 (3H, s), 3.47 (3H, s), 3.40–3.32 (1H, m), 3.18 (1H, dd, *J* = 6.6, 4.4 Hz), 3.13 (1H, dd, *J* = 15.4, 9.2 Hz), 2.64 (1H, s), 2.18 (1H, s); <sup>13</sup>C NMR (125 MHz, CDCl<sub>3</sub>)  $\delta$  165.7, 165.5, 163.4, 163.0, 157.5, 157.1, 148.9, 148.0, 141.7, 138.2, 136.3, 134.6, 134.5, 134.3, 132.7, 132.6, 131.8, 131.6, 131.3, 130.2, 129.9, 124.3, 124.0, 123.7, 116.3, 115.6, 94.9, 94.8, 68.4, 65.2, 64.4, 62.3, 56.9, 56.8, 54.7, 54.2, 54.1, 52.6, 52.5, 51.3, 49.1, 47.1, 43.9, 42.8, 42.4, 40.9, 36.2; IR (neat) 3502, 2954, 1723, 1546, 1437, 1373, 1299, 1238, 1019 and 731 cm<sup>-1</sup>; HRMS (FAB) *m/z* calcd for C<sub>24</sub>H<sub>28</sub>N<sub>3</sub>O<sub>12</sub>S (M + H)<sup>+</sup> 582.1388, found 552.1373.

The diol (160 mg, 0.275 mmol, 1.0 equiv) was dissolved with MeCN (2.8 mL) in a 50 mL round-bottomed flask. To the solution were added PhSH (42.4  $\mu$ L, 0.413 mmol, 1.5 equiv) and Cs<sub>2</sub>CO<sub>3</sub> (135 mg, 0.413 mmol, 1.5 equiv) at room temperature. After stirring for 3 h at room temperature, saturated aqueous NH<sub>4</sub>Cl was added. The layers were separated, and the aqueous portion was extracted with EtOAc×5. The combined organic extracts were washed with brine, dried over anhydrous Na<sub>2</sub>SO<sub>4</sub>, filtered, and concentrated *in vacuo*. The residue was purified by silica gel column chromatography (30:1 CH<sub>2</sub>Cl<sub>2</sub>/MeOH) to give the corresponding amine **8** as a colorless solid (105 mg, 96%) (recrystallized from CH<sub>2</sub>Cl<sub>2</sub>-hexane to give colorless prisms); [ $\alpha$ ]<sub>D</sub><sup>20</sup> +156.7 (*c* 1.00, CHCl<sub>3</sub>); <sup>1</sup>H NMR (300 MHz, CD<sub>3</sub>OD)  $\delta$  TMS: 7.90 (2H, br d, *J* = 2.5 Hz), 7.60 (1H, br s), 7.54 (1H, br s), 5.30 (2H, s), 4.76 (1H, br s), 4.04–3.96 (1H, m), 3.89 (3H, s), 3.77 (1H, dd, *J* = 10.3, 9.5 Hz), 3.68 (3H, s), 3.62 (1H, dd, *J* = 10.3, 4.4 Hz), 3.50 (3H, s), 3.54–3.46 (2H, m), 2.57 (1H, br d, *J* = 6.6 Hz), 2.40–2.34 (1H, m); <sup>13</sup>C NMR (125 MHz, CDCl<sub>3</sub>)  $\delta$  166.4, 164.0, 156.2, 146.3, 131.6, 130.6, 122.1, 94.8, 68.4, 64.8, 63.6, 56.7, 53.9, 52.5, 50.3, 44.0, 42.9, 37.2; IR (neat) 3303, 2952, 1720, 1580, 1440, 1299, 1235, 1048, 757 cm<sup>-1</sup>; HRMS (FAB) *m/z* calcd for C<sub>18</sub>H<sub>25</sub>N<sub>2</sub>O<sub>8</sub> (M + H)<sup>+</sup> 397.1605, found 397.1596.

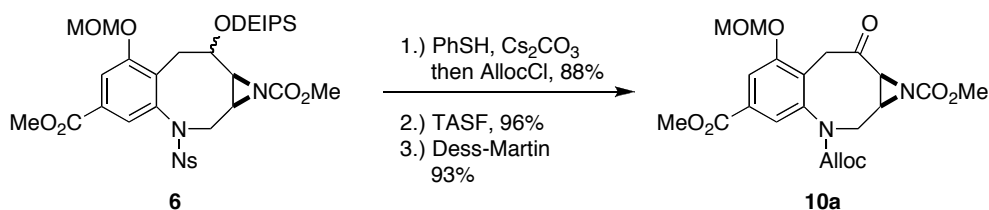

**Compound 10a.** Benzazocane **9** (1.00 g, 1.47 mmol, 1.0 equiv) was dissolved in MeCN (15 mL) in a 50 mL round-bottomed flask. To the solution were added PhSH (227  $\mu$ L, 2.21 mmol, 1.5 equiv) and Cs<sub>2</sub>CO<sub>3</sub> (960 mg, 2.95 mmol, 2.0 equiv) at room temperature. After stirring for 3.5 h, allyl chloroformate (313  $\mu$ L, 2.95 mmol, 2.0 equiv) was added, and the reaction mixture was stirred for 2 h. Following the addition of saturated aqueous NH<sub>4</sub>Cl, the layers were separated, and the aqueous layer was extracted with EtOAc×3. The combined organic extracts were washed with brine, dried over anhydrous Na<sub>2</sub>SO<sub>4</sub>, filtered, and concentrated *in vacuo*. The residue was purified by silica gel column chromatography (1:2 hexane/EtOAc) to give the corresponding allyl carbamate as a colorless oil (820 mg, 96%) (note: at room temperature, this compound exists as an equilibrating mixture of conformational isomers on the

NMR time scale). Major diastereomer:  $[\alpha]_D^{20} +30.6$  ( $c$  1.00,  $\text{CHCl}_3$ );  $^1\text{H}$  NMR (300 MHz,  $\text{DMSO}-d_6$ , 393K)  $\delta$  7.62 (1H, d,  $J = 1.5$  Hz), 7.41 (1H, d,  $J = 1.5$  Hz), 5.89 (1H, m), 5.31 (1H, d,  $J = 6.5$  Hz), 5.27 (1H, d,  $J = 6.5$  Hz), 5.23–5.13 (1H, m), 4.62 (0.25H, d,  $J = 5.0$  Hz), 4.56 (0.75H, d,  $J = 5.0$  Hz), 4.42–4.33 (1H, m), 4.20–4.06 (1H, br s), 3.87 (3H, s), 3.86–3.75 (1H, m), 3.66 (3H, s), 3.48 (3H, s), 3.07–2.82 (4H, m), 2.71–2.63 (2H, m), 1.04–0.95 (13H, m), 0.75–0.66 (4H, m);  $^{13}\text{C}$  NMR (100 MHz,  $\text{CDCl}_3$ )  $\delta$  166.4, 166.2, 164.5, 163.6, 156.3, 156.1, 155.8, 155.1, 154.7, 142.7, 142.6, 142.4, 132.8, 132.6, 132.0, 131.8, 131.1, 130.8, 130.6, 129.1, 123.2, 122.8, 117.9, 117.4, 117.1, 114.1, 113.7, 113.2, 95.1, 94.6, 70.4, 66.9, 66.4, 65.8, 56.5, 53.8, 53.7, 52.5, 52.4, 49.9, 48.7, 47.4, 46.2, 40.6, 39.0, 30.1, 29.7, 29.5, 17.4, 17.3, 17.2, 12.9, 7.2, 3.8, 3.6; IR (neat) 2953, 1726, 1583, 1437, 1295, 1240, 1015  $\text{cm}^{-1}$ ; HRMS (FAB)  $m/z$  calcd for  $\text{C}_{28}\text{H}_{43}\text{N}_2\text{O}_9\text{Si}$  ( $\text{M} + \text{H}$ ) $^+$  579.2732, found 579.2721.

The allyl carbamate (820 mg, 1.42 mmol, 1.0 equiv) was dissolved in DMF (14 mL) and  $\text{H}_2\text{O}$  (1.4 mL) in a 100 mL round-bottomed flask. To the solution was added tris(dimethylamino)sulfur (trimethylsilyl) difluoride (TASF) (782 mg, 2.84 mmol, 2.0 equiv) at room temperature. After stirring for 3 h at room temperature, saturated aqueous  $\text{NH}_4\text{Cl}$  was added. The layers were separated, and the aqueous portion was extracted with  $\text{EtOAc} \times 5$ . The combined organic extracts were washed with brine, dried over anhydrous  $\text{Na}_2\text{SO}_4$ , filtered, and concentrated *in vacuo*. The residue was purified by silica gel column chromatography ( $\text{EtOAc}$ ) to give the corresponding secondary alcohol (608 mg, 95%) as a colorless oil (note: at room temperature, this compound exists as an equilibrating mixture of conformational isomers on the NMR time scale). Major diastereomer:  $[\alpha]_D^{20} +14.9$  ( $c = 1.00$ ,  $\text{CHCl}_3$ );  $^1\text{H}$  NMR (400 MHz,  $\text{CDCl}_3$ )  $\delta$  TMS: 7.68 (1H, br s), 7.53 (0.4H, br s), 7.47 (0.6H, br s), 6.03–5.92 (0.4H, m), 5.82–5.71 (0.6H, m), 5.37 (0.6H, d,  $J = 7.0$  Hz), 5.25 (2H, s), 5.13–5.01 (1.4H, m), 4.65 (1H, br d,  $J = 3.6$  Hz), 4.53 (2H, br s), 4.19 (1H, br s), 3.87 (1.8H, s), 3.85 (1.2H, s), 3.73 (1.8H, s), 3.70 (1.2H, s), 3.66–3.54 (1H, m), 3.48 (1.8H, s), 3.47 (1.2H, s), 3.21 (1H, br d,  $J = 10.2$  Hz), 2.93–2.42 (4H, m);  $^{13}\text{C}$  NMR (100 MHz,  $\text{CDCl}_3$ )  $\delta$  166.2, 164.1, 163.7, 163.3, 156.4, 155.6, 155.1, 154.8, 143.2, 142.3, 141.9, 132.8, 132.6, 131.3, 130.9, 130.6, 129.6, 123.3, 122.9, 118.0, 117.5, 117.3, 114.3, 114.1, 113.8, 95.1, 94.6, 69.1, 66.9, 66.5, 63.5, 56.5, 54.3, 54.2, 52.5, 52.4, 51.1, 48.7, 46.3, 46.1, 41.5, 41.1, 39.9, 29.9, 29.3, 28.1; IR (neat) 3481, 2953, 1719, 1583, 1437, 1296, 1240, 1014  $\text{cm}^{-1}$ ; HRMS (FAB)  $m/z$  calcd for  $\text{C}_{21}\text{H}_{27}\text{N}_2\text{O}_9$  ( $\text{M} + \text{H}$ ) $^+$  451.1711, found 451.1722.

The secondary alcohol (280 mg, 0.622 mmol, 1.0 equiv) was dissolved in  $\text{CH}_2\text{Cl}_2$  (6.2 mL) in a 50 mL round-bottomed flask. To the solution was added Dess-Martin periodinane (396 mg, 0.933 mmol, 1.5 equiv) at room temperature. After stirring for 1 h at room temperature,  $\text{Et}_2\text{O}$  and a solution of saturated aqueous  $\text{NaHCO}_3$  containing  $\text{Na}_2\text{S}_2\text{O}_3 \cdot 5\text{H}_2\text{O}$  were added. The mixture was vigorously stirred for 5 min (until both layers are transparent) at room temperature. The layers were separated, and the aqueous layer was extracted with  $\text{EtOAc} \times 3$ . The combined organic extracts were washed with brine, dried over anhydrous  $\text{Na}_2\text{SO}_4$ , filtered, and concentrated *in vacuo*. The residue was purified by silica gel column chromatography (1: 2 hexane/ $\text{EtOAc}$ ) to give the ketone **10a** (258 mg, 93%) as a colorless oil (note: at room temperature, this compound exists as an equilibrating mixture of conformational isomers on the NMR time scale).  $[\alpha]_D^{20} -50.6$  ( $c = 1.00$ ,  $\text{CHCl}_3$ );  $^1\text{H}$  NMR (400 MHz,  $\text{CDCl}_3$ )  $\delta$  TMS: 7.66–7.74 (1H, m), 7.56–7.41 (1H, m), 6.02–5.70 (1H, m), 5.60 (0.2H, d,  $J = 34.7$  Hz), 5.33–5.22 (2H, m), 5.15–4.99 (1.6H, m), 4.88–4.41 (3.4H, m), 4.16 (1H, d,  $J = 17.3$  Hz), 3.91–3.85 (3H, m), 3.75 (0.6H, br s), 3.65–3.06 (8.8H, m), 2.84 (0.2H, br s), 2.76–2.46 (0.2H, m), 2.57 (0.2H, d,  $J = 17.3$  Hz);  $^{13}\text{C}$  NMR (100 MHz,  $\text{CDCl}_3$ )  $\delta$  203.7, 202.7, 202.2, 166.1, 166.0, 161.8, 156.0, 155.5, 154.6, 153.8, 141.6, 140.6, 133.8, 132.4, 132.1, 131.2, 130.3, 129.9, 124.3, 124.1, 123.0, 122.7, 121.7, 118.5, 117.9, 117.6, 117.5, 115.7, 115.3, 114.4, 114.1, 95.6, 95.4, 94.8, 94.5, 67.4, 66.8, 56.8, 56.5, 54.8, 54.4, 54.1, 53.0, 52.6, 52.5, 51.5, 50.8, 47.6, 47.4, 47.0, 46.8, 46.5, 45.6, 42.6, 41.4, 41.1, 34.5, 34.0; IR (neat) 2954, 1722, 1582, 1438, 1388, 1318, 1286, 1264, 1243 1153, 1015, 767  $\text{cm}^{-1}$ ; HRMS (FAB)  $m/z$  calcd for  $\text{C}_{21}\text{H}_{25}\text{N}_2\text{O}_9$  ( $\text{M} + \text{H}$ ) $^+$  449.1555, found 449.1557.

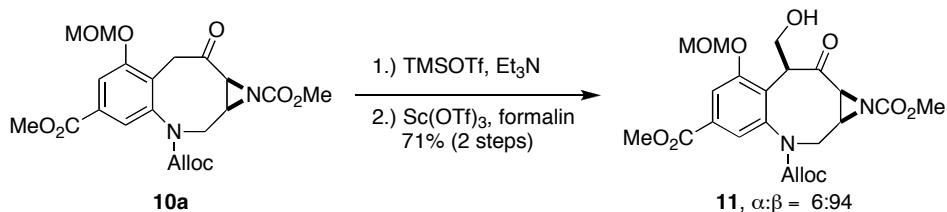

**Compound 11.** The ketone **10a** (215 mg, 0.480 mmol, 1.0 equiv) was dissolved in  $\text{CH}_2\text{Cl}_2$  (2.4 mL) in a 25 mL round-bottomed flask. To the solution were added  $\text{Et}_3\text{N}$  (0.167 mL, 1.20 mmol, 2.5 equiv) and TMSOTf (0.174 mL, 0.960 mmol, 2.0 equiv) at room temperature. After stirring for 2 h, the reaction mixture was passed through a short

plug of activated, neutral alumina using EtOAc-hexane (3:1), and the combined filtrates were concentrated *in vacuo*. The resulting silyl enol ether (285 mg) was dissolved in THF/H<sub>2</sub>O (9:1, v/v) (1.6 mL) in a 25 mL round-bottomed flask. To the solution was added 37% aqueous formaldehyde solution (0.195 mL, 2.40 mmol, 5.0 equiv) containing Sc(OTf)<sub>3</sub> (23.6 mg, 0.0480 mmol, 0.1 equiv) at room temperature. After stirring for 30 min, the reaction was quenched with H<sub>2</sub>O and the layers were separated. The aqueous layer was extracted with CH<sub>2</sub>Cl<sub>2</sub>×3, and the combined organic layers were washed with brine, dried over anhydrous Na<sub>2</sub>SO<sub>4</sub>, filtered, and concentrated *in vacuo*. The residue was purified by silica gel column chromatography (1:5 hexane/EtOAc) to give the hydroxymethyl ketone **11** as a colorless oil (147 mg, 62%, 2 steps,  $\alpha : \beta = 6 : 94$ ): <sup>1</sup>H NMR (300 MHz, CDCl<sub>3</sub>)  $\delta$  TMS 7.83 (1H, d,  $J = 1.5$  Hz), 7.52 (1H, br s), 5.90–5.76 (1H, m), 5.37 (1H, d,  $J = 7.3$  Hz), 5.34 (1H, d,  $J = 7.3$  Hz), 5.21–5.12 (1H, m), 4.55–4.51 (1H, m), 4.47 (1H, dd,  $J = 8.9, 3.7$  Hz), 4.43–4.36 (1H, m), 4.16–4.09 (1H, m), 3.92 (3H, s), 3.71 (3H, s), 3.54 (3H, s), 3.56–3.46 (1H, m), 3.28 (1H, d,  $J = 7.0$  Hz), 2.86–2.79 (1H, m), 2.77 (1H, ddd,  $J = 7.0, 5.9, 3.7$  Hz); <sup>13</sup>C NMR (100 MHz, CDCl<sub>3</sub>)  $\delta$  202.2, 165.7, 162.2, 156.0, 140.4, 132.6, 132.0, 131.0, 123.3, 118.7, 114.8, 94.9, 67.4, 61.4, 57.0, 54.3, 52.8, 51.9, 48.5, 45.6, 41.6, 29.9; IR (neat) 3527 (br), 2954, 1721, 1578, 1438, 1390, 1292, 1251, 1217, 1154, 1018, 732 cm<sup>-1</sup>; HRMS (FAB)  $m/z$  calcd for C<sub>22</sub>H<sub>27</sub>N<sub>2</sub>O<sub>10</sub> (M + H)<sup>+</sup> 479.1666, found 479.1655.

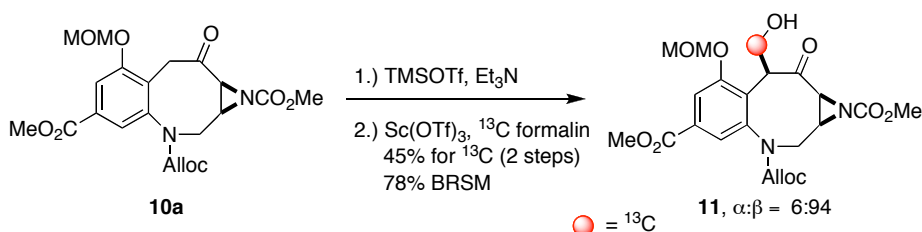

**Preparation of <sup>13</sup>C-labelled compound 11.** The ketone **10a** (50.0 mg, 0.112 mmol, 1.0 equiv) was dissolved in CH<sub>2</sub>Cl<sub>2</sub> (1.2 mL) in a 10 mL round-bottomed flask. To the solution were added Et<sub>3</sub>N (38.9  $\mu$ L, 0.279 mmol, 2.5 equiv) and TMSOTf (40.4  $\mu$ L, 0.223 mmol, 2.0 equiv) at room temperature. After stirring for 2 h, the reaction mixture was passed through a short column of activated, neutral alumina using EtOAc-hexane (3:1) as an eluent, and the combined filtrates were concentrated *in vacuo*. The resulting silyl enol ether (52.1 mg) was dissolved with THF (0.33 mL) in a 10 mL round-bottomed flask. To the solution was added 20% aqueous <sup>13</sup>C-formaldehyde solution (86.6  $\mu$ L, 0.558 mmol, 5.0 equiv) containing Sc(OTf)<sub>3</sub> (5.5 mg, 0.011 mmol, 0.1 equiv) at 0 °C. After stirring for 2 h at 0 °C, the reaction was quenched with H<sub>2</sub>O. The layers were separated, and the aqueous portion was extracted with CH<sub>2</sub>Cl<sub>2</sub>×4. The combined organic layers were washed with brine, dried over anhydrous Na<sub>2</sub>SO<sub>4</sub>, filtered, and concentrated *in vacuo*. The residue was purified by silica gel column chromatography (40: 1 CH<sub>2</sub>Cl<sub>2</sub>/MeOH) to give the hydroxyl-<sup>13</sup>C-methyl ketone <sup>13</sup>C-**11** (30.5 mg, 73%, 2 steps,  $\alpha : \beta = 4 : 96$  inseparable mixture) as a colorless oil, and the recovered ketone **10a** (20.6 mg, 41%): <sup>1</sup>H NMR (400 MHz, CDCl<sub>3</sub>)  $\delta$  TMS: 7.82 (1H, d,  $J = 1.1$  Hz), 7.50 (1H, br s), 5.86–5.72 (1H, m), 5.35 (1H, d,  $J = 6.8$  Hz), 5.32 (1H, d,  $J = 6.8$  Hz), 5.26–5.05 (2H, m), 4.50 (2H, br s), 4.49–4.23 (2H, m), 3.90 (3H, s), 3.68 (3H, s), 3.51 (3H, s), 3.40–3.27 (1H, m), 3.26 (1H, d,  $J = 7.2$  Hz), 2.83–2.75 (1H, m), 2.74 (1H, ddd,  $J = 7.2, 6.3, 3.8$  Hz); <sup>13</sup>C NMR (100 MHz, CDCl<sub>3</sub>)  $\delta$  202.2, 165.7, 162.2, 156.0, 155.2, 140.4, 132.6, 132.0, 131.6, 130.9, 123.3, 118.7, 114.8, 94.9, 67.4, 61.4 (<sup>13</sup>C), 57.0, 54.3, 52.8, 52.1, 51.7, 48.5, 45.6, 41.6; IR (neat) 3532 (br), 2954, 1722, 1578, 1438, 1390, 1291, 1251, 1217, 1153, 1018, 731 cm<sup>-1</sup>. Multiple attempts to obtain a high-resolution mass spectrum of pure material were unsuccessful.

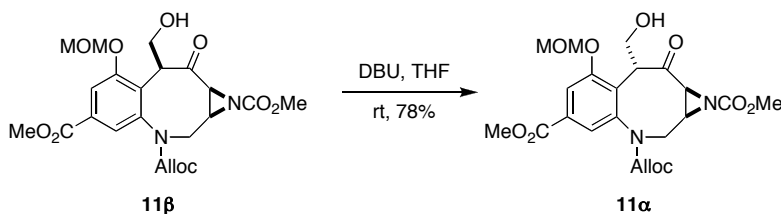

**Epimerization Procedure for 11.** The ketone **11** (28.5 mg, 0.0596 mmol, 1.0 equiv) was dissolved in THF (2.9 mL) in a 10 mL round-bottomed flask. To the solution was added DBU (4.46  $\mu$ L, 0.0298 mmol, 0.5 equiv) at room temperature. After stirring for 15 h, saturated aqueous NH<sub>4</sub>Cl was added to the reaction mixture. The layers were separated, and the aqueous portion was extracted with EtOAc×4. The combined organic layers were washed with brine, dried over anhydrous Na<sub>2</sub>SO<sub>4</sub>, filtered, and concentrated *in vacuo*. The residue was purified by silica gel column chromatography (1: 5 hexane/EtOAc) to give the hydroxymethyl ketone **11a** as a colorless oil (22.2 mg, 78%,  $\alpha : \beta = 87 : 13$ ): <sup>1</sup>H NMR (300 MHz, CDCl<sub>3</sub>)  $\delta$  TMS: 7.80 (1H, d,  $J = 1.5$  Hz), 7.46 (1H, br s), 5.96–5.80 (1H,

m), 5.46 (1H, d,  $J = 6.8$  Hz), 5.36 (1H, d,  $J = 6.8$  Hz), 5.27–5.12 (2H, m), 4.78 (1H, br d,  $J = 15.6$  Hz), 4.58 (2H, br s), 4.45 (1H, dd,  $J = 9.0, 2.9$  Hz), 4.16–4.06 (1H, m), 3.96 (3H, s), 3.67 (3H, s), 3.73–3.62 (1H, m), 3.55 (3H, s), 3.36 (1H, d,  $J = 6.8$  Hz), 3.20 (1H, br dd,  $J = 6.8, 3.1$  Hz), 2.85–2.79 (1H, m);  $^{13}\text{C}$  NMR (300 MHz,  $\text{CDCl}_3$ )  $\delta$  205.9, 165.9, 161.6, 155.0, 154.0, 140.7, 133.3, 132.0, 131.2, 121.8, 118.8, 114.6, 94.3, 67.7, 61.6, 56.5, 54.1, 53.5, 52.6, 46.4, 46.2, 45.5; IR (neat) 3537 (br), 2954, 1721, 1580, 1437, 1389, 1290, 1262, 1154, 1015, 732  $\text{cm}^{-1}$ ; HRMS (FAB)  $m/z$  calcd for  $\text{C}_{22}\text{H}_{27}\text{N}_2\text{O}_{10}$  ( $\text{M} + \text{H}$ ) $^+$  479.1660, found 479.1669.

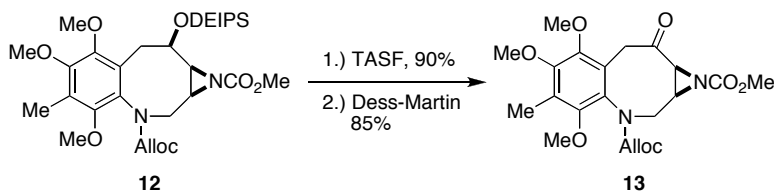

**Compound 13.** To compound **12** (370 mg, 0.66 mmol) in 15 mL of a 10:1 solution of DMF/water was added tris(dimethylamino)sulfur (trimethylsilyl)difluoride (TASF) (270 mg, 0.99 mmol). The reaction mixture was stirred at ambient temperature overnight (12 h). Addition of 20 mL saturated aqueous  $\text{NH}_4\text{Cl}$  followed by extraction with  $\text{CH}_2\text{Cl}_2$  (4  $\times$  10 mL) provided the crude product. The residue was purified by column chromatography (3:1 ethyl acetate/hexanes) to afford the corresponding secondary alcohol (260 mg, 90%) as a white foam:  $[\alpha]_{\text{D}}^{23} -0.3$  ( $c$  1.00,  $\text{CHCl}_3$ ); Spectral complexity due to rotameric mixtures (compound did not coalesce at 393 K), precluded integration of individual  $^1\text{H}$  signals  $^1\text{H}$  NMR (500 MHz,  $\text{CDCl}_3$ , mixture of carbamate rotamers)  $\delta$  6.07–5.95 (m), 5.87–5.75 (m), 5.43–5.34 (m), 5.32–5.23 (m), 5.16–5.06 (m), 4.82 (d), 4.79 (d), 4.74 (d), 4.72–4.65 (m), 4.60–4.54 (m), 4.14–4.06 (m), 3.87 (s), 3.86 (s), 3.85 (s), 3.84 (d), 3.82 (d), 3.77 (s), 3.74 (s), 3.70 (s), 3.69 (s), 3.68 (s), 3.67 (s), 3.66 (s), 3.42 (ddd), 3.12–3.02 (m), 2.93–2.85 (m), 2.78–2.57 (m), 2.51 (d), 2.44 (d), 2.35 (t), 2.19 (s), 2.18 (s), 2.17 (s), 1.40 (br s);  $^{13}\text{C}$  NMR (100 MHz,  $\text{CDCl}_3$ , mixture of carbamate rotamers)  $\delta$  168.6, 164.4, 164.1, 156.0, 155.4, 155.3, 152.0, 151.2, 147.7, 133.1, 133.0, 133.9, 133.8, 129.3, 129.1, 117.7, 117.6, 117.5, 117.0, 71.3, 71.0, 66.8, 66.5, 66.4, 63.4, 61.0, 60.9, 60.8, 60.4, 60.3, 60.2, 54.3, 54.1, 47.8, 47.7, 46.7, 46.6, 42.0, 41.7, 29.2, 29.1, 9.10, 9.8, 9.7; IR (film) 3439, 2942, 1706, 1468, 1252, 1091  $\text{cm}^{-1}$ ; HRMS (FAB) calcd for  $\text{C}_{21}\text{H}_{28}\text{N}_2\text{O}_8$  ( $\text{M} + \text{H}$ ) $^+$  437.1923, found 437.1926.

To the secondary alcohol (260 mg, 0.60 mmol) in dichloromethane (20 mL) was added Dess-Martin periodinane (490 mg, 1.02 mmol) and stirred until complete consumption of starting material by TLC (2 h). The reaction was diluted with ether (75 mL) and poured into 75 mL of a saturated aqueous solution of  $\text{NaHCO}_3$  with a seven-fold excess of  $\text{Na}_2\text{S}_2\text{O}_3 \cdot 5\text{H}_2\text{O}$  (1.1 g), and stirred for 15 minutes. After separation of the layers, the aqueous layer was extracted with  $\text{Et}_2\text{O} \times 3$ . The organic extracts were combined, washed once with brine, dried over anhydrous  $\text{Na}_2\text{SO}_4$ , filtered, and concentrated *in vacuo*. The crude oil was purified by column chromatography (3:1 hexanes/ethyl acetate) to give ketone **13** (220 mg, 85%) as a white foam:  $[\alpha]_{\text{D}}^{23} -44.9$  ( $c$  2.20,  $\text{CHCl}_3$ ); Spectral complexity due to rotameric mixtures (compound did not coalesce at 393 K), precluded integration of individual  $^1\text{H}$  signals  $^1\text{H}$  NMR (400 MHz,  $\text{CDCl}_3$ , mixture of carbamate rotamers)  $\delta$  6.05–5.91 (m), 5.86–5.73 (m), 5.38–5.22 (m), 5.10–5.02 (dd), 4.77–4.43 (m), 4.07 (dd), 3.92 (d), 3.87 (s), 3.83 (s), 3.81 (s), 3.77 (s), 3.74 (s), 3.73 (s), 3.65 (s), 3.62 (s), 3.61 (s), 3.58 (s), 3.54 (s), 3.50 (s), 3.43 (s), 3.39 (s), 3.33 (d), 3.29 (d), 3.20 (d), 3.14–3.09 (m), 2.83–2.80 (m), 2.14 (s), 2.13 (s);  $^{13}\text{C}$  NMR (100 MHz,  $\text{CDCl}_3$ , mixture of carbamate rotamers)  $\delta$  204.3, 204.1, 203.5, 203.0, 162.4, 162.1, 161.9, 155.6, 155.3, 152.9, 152.8, 152.0, 150.4, 147.7, 147.5, 146.0, 133.0, 132.6, 129.7, 128.6, 127.7, 127.5, 125.8, 125.7, 124.5, 118.4, 118.1, 118.0, 117.6, 67.4, 67.2, 66.7, 61.3, 61.0, 60.9, 60.5, 60.4, 60.3, 54.4, 54.2, 54.0, 47.0, 46.9, 46.8, 46.6, 45.8, 45.3, 45.0, 42.7, 41.3, 35.3, 34.6, 9.9, 9.8, 9.7, 1.2; IR (film) 3377, 2941, 2845, 1698, 1591, 1469, 1334, 1274, 1083  $\text{cm}^{-1}$ ; HRMS (FAB) calcd for  $\text{C}_{21}\text{H}_{26}\text{N}_2\text{O}_8$  435.1767, found 435.1764.

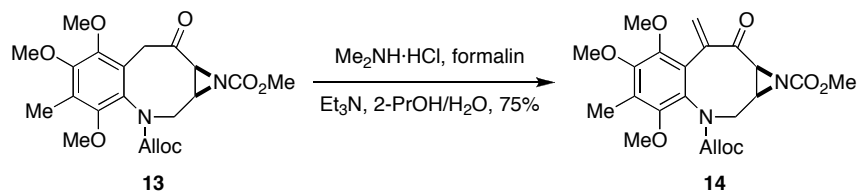

**Compound 14.** To ketone **13** (77 mg, 0.18 mmol) in 9:1 *i*-PrOH/ $\text{H}_2\text{O}$  was added  $\text{Me}_2\text{NH} \cdot \text{HCl}$  (17 mg, 0.21 mmol), formalin (70  $\mu\text{L}$ , 0.87 mmol), and triethylamine (8  $\mu\text{L}$ , 0.054 mmol) in a small vial. The vial was then capped and heated at 90  $^\circ\text{C}$  overnight (10h). The reaction mixture was cooled to ambient temperature, diluted with chloroform,

and washed once each with 10% citric acid, saturated aqueous NaHCO<sub>3</sub>, and brine. The organic layer was then dried over anhydrous MgSO<sub>4</sub>, filtered, and concentrated *in vacuo*. Column chromatography (4:1) hexanes/ethyl acetate afforded enone **14** (60 mg, 75%) as a white foam:  $[\alpha]_D^{23} -4.8$  (*c* 0.65, CHCl<sub>3</sub>); Spectral complexity due to rotameric mixtures (compound did not coalesce at 393 K), precluded integration of individual <sup>1</sup>H signals <sup>1</sup>H NMR (400 MHz, CDCl<sub>3</sub>, mixture of carbamate rotamers)  $\delta$  6.43 (d), 6.41 (d), 6.31 (d), 6.29 (d), 6.19 (d), 6.05 (d), 6.01–5.86 (m), 5.96 (d), 5.84 (d), 5.81–5.68 (m), 5.36–5.21 (m), 5.17–5.02 (m), 4.69–4.39 (m), 4.22–4.03 (m), 3.93 (s), 3.92 (s), 3.90 (s), 3.89 (s), 3.81 (s), 3.80 (s), 3.79 (s), 3.77 (s), 3.70 (s), 3.69 (s), 3.67 (s), 3.65 (s), 3.63 (s), 3.58 (s), 3.57 (s), 3.25 (d), 3.18–3.08 (m), 2.75 (q), 2.24 (s), 2.23 (s), 2.21, (s), 2.20 (s); <sup>13</sup>C NMR (100 MHz, CDCl<sub>3</sub>, mixture of carbamate rotamers)  $\delta$  196.1, 161.5, 155.1, 152.7, 149.8, 146.7, 140.1, 123.6, 130.8, 130.5, 129.8, 129.0, 128.4, 128.0, 126.1, 118.5, 118.0, 117.6, 67.4, 66.8, 60.9, 60.5, 53.9, 47.1, 46.8, 46.3, 45.5, 44.1, 43.6, 41.5, 29.9, 10.0, 9.9; IR (film) 3346, 2937, 1717, 1598, 1466, 1389, 1258, 1134, 1023 cm<sup>-1</sup>; HRMS (FAB) calcd for C<sub>22</sub>H<sub>26</sub>N<sub>2</sub>O<sub>8</sub> 447.1767, found 447.1751.

#### X-ray Crystal structure of diol **9**:

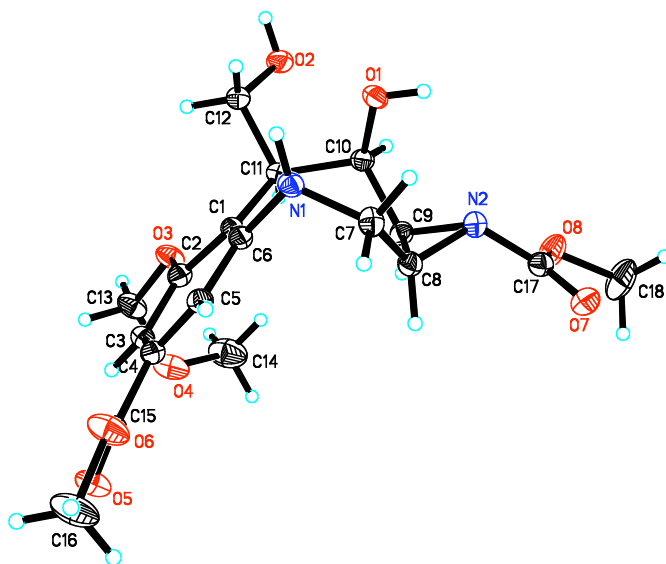

Table 1. Crystal data and structure refinement for rw105.

|                      |                                                               |                              |
|----------------------|---------------------------------------------------------------|------------------------------|
| Identification code  | rw105                                                         |                              |
| Empirical formula    | C <sub>18</sub> H <sub>24</sub> N <sub>2</sub> O <sub>8</sub> |                              |
| Formula weight       | 396.39                                                        |                              |
| Temperature          | 100(2) K                                                      |                              |
| Wavelength           | 0.71073 Å                                                     |                              |
| Crystal system       | Monoclinic                                                    |                              |
| Space group          | P2(1)                                                         |                              |
| Unit cell dimensions | a = 9.7860(10) Å                                              | $\alpha = 90^\circ$ .        |
|                      | b = 10.0112(11) Å                                             | $\beta = 107.503(2)^\circ$ . |
|                      | c = 10.4204(11) Å                                             | $\gamma = 90^\circ$ .        |
| Volume               | 973.62(18) Å <sup>3</sup>                                     |                              |

|                                   |                                             |
|-----------------------------------|---------------------------------------------|
| Z                                 | 2                                           |
| Density (calculated)              | 1.352 Mg/m <sup>3</sup>                     |
| Absorption coefficient            | 0.107 mm <sup>-1</sup>                      |
| F(000)                            | 420                                         |
| Crystal size                      | 0.45 x 0.34 x 0.30 mm <sup>3</sup>          |
| Theta range for data collection   | 2.05 to 28.28°.                             |
| Index ranges                      | -12<=h<=13, -13<=k<=13, -13<=l<=13          |
| Reflections collected             | 9293                                        |
| Independent reflections           | 4516 [R(int) = 0.0183]                      |
| Completeness to theta = 28.28°    | 98.2 %                                      |
| Absorption correction             | multi-scan                                  |
| Max. and min. transmission        | 0.9686 and 0.9534                           |
| Refinement method                 | Full-matrix least-squares on F <sup>2</sup> |
| Data / restraints / parameters    | 4516 / 1 / 253                              |
| Goodness-of-fit on F <sup>2</sup> | 1.041                                       |
| Final R indices [I>2sigma(I)]     | R1 = 0.0368, wR2 = 0.1030                   |
| R indices (all data)              | R1 = 0.0374, wR2 = 0.1040)                  |
| Largest diff. peak and hole       | 0.544 and -0.440 e.Å <sup>-3</sup>          |



Table 2. Atomic coordinates ( $\times 10^4$ ) and equivalent isotropic displacement parameters ( $\text{\AA}^2 \times 10^3$ ) for rw105.  $U(\text{eq})$  is defined as one third of the trace of the orthogonalized  $U^{ij}$  tensor.

|       | x        | y        | z       | $U(\text{eq})$ |
|-------|----------|----------|---------|----------------|
| O(1)  | 9826(1)  | 6226(1)  | 189(1)  | 19(1)          |
| O(2)  | 7835(1)  | 5411(1)  | 1813(1) | 23(1)          |
| O(3)  | 10345(1) | 7353(1)  | 5164(1) | 22(1)          |
| O(4)  | 12100(1) | 6943(1)  | 7215(1) | 32(1)          |
| O(5)  | 14082(1) | 11173(1) | 6251(1) | 29(1)          |
| O(6)  | 13626(1) | 12121(1) | 4215(1) | 32(1)          |
| O(7)  | 14895(1) | 5058(1)  | 447(1)  | 25(1)          |
| O(8)  | 13556(1) | 3602(1)  | 1213(1) | 28(1)          |
| N(1)  | 10989(1) | 8702(1)  | 934(1)  | 18(1)          |
| N(2)  | 12734(1) | 5677(1)  | 713(1)  | 19(1)          |
| C(1)  | 10768(1) | 7917(1)  | 3125(1) | 16(1)          |
| C(2)  | 11012(1) | 8200(2)  | 4506(1) | 18(1)          |
| C(3)  | 11883(1) | 9256(2)  | 5137(1) | 19(1)          |
| C(4)  | 12441(1) | 10105(1) | 4355(1) | 18(1)          |
| C(5)  | 12110(1) | 9928(1)  | 2971(1) | 18(1)          |
| C(6)  | 11278(1) | 8831(1)  | 2357(1) | 17(1)          |
| C(7)  | 12226(2) | 8208(1)  | 525(1)  | 20(1)          |
| C(8)  | 12971(2) | 7005(2)  | 1342(1) | 18(1)          |
| C(9)  | 12173(1) | 5929(1)  | 1835(1) | 17(1)          |
| C(10) | 10555(1) | 5838(1)  | 1528(1) | 17(1)          |
| C(11) | 10028(1) | 6600(1)  | 2587(1) | 16(1)          |
| C(12) | 8391(2)  | 6733(1)  | 2099(2) | 20(1)          |
| C(13) | 10729(2) | 7427(2)  | 6598(1) | 25(1)          |
| C(14) | 12188(2) | 5526(2)  | 7139(2) | 43(1)          |
| C(15) | 13456(2) | 11170(2) | 5061(2) | 20(1)          |
| C(16) | 14676(2) | 13134(2) | 4813(2) | 39(1)          |
| C(17) | 13852(2) | 4803(2)  | 801(1)  | 20(1)          |
| C(18) | 14565(2) | 2565(2)  | 1163(2) | 41(1)          |

Table 3. Bond lengths [Å] and angles [°] for rw105.

|                  |            |
|------------------|------------|
| O(1)-C(10)       | 1.4170(15) |
| O(2)-C(12)       | 1.4278(17) |
| O(3)-C(2)        | 1.3734(17) |
| O(3)-C(13)       | 1.4284(16) |
| O(4)-C(13)       | 1.389(2)   |
| O(4)-C(14)       | 1.425(2)   |
| O(5)-C(15)       | 1.2068(18) |
| O(6)-C(15)       | 1.3406(19) |
| O(6)-C(16)       | 1.4453(19) |
| O(7)-C(17)       | 1.2124(18) |
| O(8)-C(17)       | 1.3370(18) |
| O(8)-C(18)       | 1.4440(19) |
| N(1)-C(6)        | 1.4297(16) |
| N(1)-C(7)        | 1.4841(18) |
| N(2)-C(17)       | 1.3821(18) |
| N(2)-C(9)        | 1.4552(17) |
| N(2)-C(8)        | 1.4695(18) |
| C(1)-C(6)        | 1.4026(19) |
| C(1)-C(2)        | 1.4140(18) |
| C(1)-C(11)       | 1.5271(18) |
| C(2)-C(3)        | 1.3924(19) |
| C(3)-C(4)        | 1.398(2)   |
| C(4)-C(5)        | 1.3908(18) |
| C(4)-C(15)       | 1.4916(19) |
| C(5)-C(6)        | 1.4021(19) |
| C(7)-C(8)        | 1.5280(19) |
| C(8)-C(9)        | 1.5081(19) |
| C(9)-C(10)       | 1.5212(18) |
| C(10)-C(11)      | 1.5523(18) |
| C(11)-C(12)      | 1.5332(19) |
| <br>             |            |
| C(2)-O(3)-C(13)  | 118.36(11) |
| C(13)-O(4)-C(14) | 112.82(14) |
| C(15)-O(6)-C(16) | 115.28(13) |

|                   |            |
|-------------------|------------|
| C(17)-O(8)-C(18)  | 114.76(13) |
| C(6)-N(1)-C(7)    | 113.82(11) |
| C(17)-N(2)-C(9)   | 122.60(12) |
| C(17)-N(2)-C(8)   | 121.83(12) |
| C(9)-N(2)-C(8)    | 62.08(9)   |
| C(6)-C(1)-C(2)    | 118.00(12) |
| C(6)-C(1)-C(11)   | 124.35(12) |
| C(2)-C(1)-C(11)   | 117.58(11) |
| O(3)-C(2)-C(3)    | 123.24(12) |
| O(3)-C(2)-C(1)    | 115.11(12) |
| C(3)-C(2)-C(1)    | 121.64(12) |
| C(2)-C(3)-C(4)    | 118.54(12) |
| C(5)-C(4)-C(3)    | 121.11(13) |
| C(5)-C(4)-C(15)   | 121.00(12) |
| C(3)-C(4)-C(15)   | 117.83(12) |
| C(4)-C(5)-C(6)    | 119.68(12) |
| C(1)-C(6)-C(5)    | 120.55(12) |
| C(1)-C(6)-N(1)    | 122.67(12) |
| C(5)-C(6)-N(1)    | 116.78(12) |
| N(1)-C(7)-C(8)    | 113.40(11) |
| N(2)-C(8)-C(9)    | 58.50(9)   |
| N(2)-C(8)-C(7)    | 118.70(11) |
| C(9)-C(8)-C(7)    | 122.92(12) |
| N(2)-C(9)-C(8)    | 59.42(9)   |
| N(2)-C(9)-C(10)   | 116.18(11) |
| C(8)-C(9)-C(10)   | 125.75(11) |
| O(1)-C(10)-C(9)   | 112.02(11) |
| O(1)-C(10)-C(11)  | 112.82(11) |
| C(9)-C(10)-C(11)  | 111.64(11) |
| C(1)-C(11)-C(12)  | 112.34(11) |
| C(1)-C(11)-C(10)  | 117.60(11) |
| C(12)-C(11)-C(10) | 110.13(11) |
| O(2)-C(12)-C(11)  | 106.49(11) |
| O(4)-C(13)-O(3)   | 112.34(12) |
| O(5)-C(15)-O(6)   | 123.32(14) |
| O(5)-C(15)-C(4)   | 124.40(14) |

|                 |            |
|-----------------|------------|
| O(6)-C(15)-C(4) | 112.26(12) |
| O(7)-C(17)-O(8) | 124.78(14) |
| O(7)-C(17)-N(2) | 124.64(14) |
| O(8)-C(17)-N(2) | 110.30(12) |

Table 4. Anisotropic displacement parameters ( $\text{\AA}^2 \times 10^3$ ) for rw105. The anisotropic displacement factor exponent takes the form:  $-2\pi^2 [ h^2 a^{*2} U^{11} + \dots + 2 h k a^* b^* U^{12} ]$

|       | $U^{11}$ | $U^{22}$ | $U^{33}$ | $U^{23}$ | $U^{13}$ | $U^{12}$ |
|-------|----------|----------|----------|----------|----------|----------|
| O(1)  | 21(1)    | 19(1)    | 15(1)    | -2(1)    | 2(1)     | -1(1)    |
| O(2)  | 18(1)    | 22(1)    | 26(1)    | -3(1)    | 3(1)     | -3(1)    |
| O(3)  | 24(1)    | 27(1)    | 16(1)    | -2(1)    | 7(1)     | -9(1)    |
| O(4)  | 33(1)    | 31(1)    | 26(1)    | 4(1)     | -1(1)    | -10(1)   |
| O(5)  | 29(1)    | 33(1)    | 21(1)    | -5(1)    | 3(1)     | -11(1)   |
| O(6)  | 38(1)    | 24(1)    | 28(1)    | 0(1)     | 1(1)     | -14(1)   |
| O(7)  | 19(1)    | 29(1)    | 28(1)    | 0(1)     | 8(1)     | 0(1)     |
| O(8)  | 26(1)    | 20(1)    | 41(1)    | 5(1)     | 16(1)    | 6(1)     |
| N(1)  | 19(1)    | 18(1)    | 15(1)    | 1(1)     | 2(1)     | 2(1)     |
| N(2)  | 20(1)    | 18(1)    | 19(1)    | -1(1)    | 7(1)     | 1(1)     |
| C(1)  | 15(1)    | 15(1)    | 17(1)    | -1(1)    | 3(1)     | 1(1)     |
| C(2)  | 17(1)    | 20(1)    | 18(1)    | 1(1)     | 5(1)     | 1(1)     |
| C(3)  | 18(1)    | 21(1)    | 17(1)    | -3(1)    | 4(1)     | -1(1)    |
| C(4)  | 16(1)    | 18(1)    | 21(1)    | -2(1)    | 3(1)     | 1(1)     |
| C(5)  | 17(1)    | 16(1)    | 20(1)    | 1(1)     | 4(1)     | -1(1)    |
| C(6)  | 17(1)    | 17(1)    | 16(1)    | 0(1)     | 2(1)     | 2(1)     |
| C(7)  | 25(1)    | 18(1)    | 16(1)    | 3(1)     | 8(1)     | 3(1)     |
| C(8)  | 19(1)    | 18(1)    | 17(1)    | 0(1)     | 5(1)     | 1(1)     |
| C(9)  | 17(1)    | 17(1)    | 17(1)    | 1(1)     | 5(1)     | 2(1)     |
| C(10) | 16(1)    | 17(1)    | 17(1)    | -1(1)    | 3(1)     | 0(1)     |
| C(11) | 16(1)    | 17(1)    | 16(1)    | -1(1)    | 3(1)     | -2(1)    |
| C(12) | 17(1)    | 21(1)    | 21(1)    | -3(1)    | 5(1)     | -1(1)    |
| C(13) | 30(1)    | 32(1)    | 16(1)    | -2(1)    | 9(1)     | -9(1)    |
| C(14) | 45(1)    | 33(1)    | 42(1)    | 4(1)     | -2(1)    | -7(1)    |
| C(15) | 20(1)    | 19(1)    | 22(1)    | -4(1)    | 5(1)     | -1(1)    |
| C(16) | 45(1)    | 29(1)    | 35(1)    | 1(1)     | 1(1)     | -21(1)   |
| C(17) | 19(1)    | 21(1)    | 19(1)    | -1(1)    | 4(1)     | 1(1)     |
| C(18) | 37(1)    | 24(1)    | 66(1)    | 8(1)     | 25(1)    | 13(1)    |

Table 5. Hydrogen coordinates ( $\times 10^4$ ) and isotropic displacement parameters ( $\text{\AA}^2 \times 10^{-3}$ ) for rw105.

|        | x     | y     | z    | U(eq) |
|--------|-------|-------|------|-------|
| H(1A)  | 10140 | 5785  | -347 | 28    |
| H(2A)  | 6954  | 5449  | 1403 | 34    |
| H(1B)  | 10154 | 8898  | 353  | 21    |
| H(3A)  | 12092 | 9396  | 6078 | 22    |
| H(5A)  | 12447 | 10547 | 2445 | 21    |
| H(7A)  | 12930 | 8941  | 628  | 23    |
| H(7B)  | 11889 | 7959  | -438 | 23    |
| H(8A)  | 13970 | 7175  | 1932 | 22    |
| H(9A)  | 12731 | 5501  | 2701 | 21    |
| H(10A) | 10326 | 4873  | 1606 | 21    |
| H(11A) | 10239 | 5993  | 3385 | 20    |
| H(12A) | 8043  | 7148  | 2804 | 24    |
| H(12B) | 8086  | 7294  | 1280 | 24    |
| H(13A) | 10675 | 8369  | 6868 | 30    |
| H(13B) | 10033 | 6905  | 6912 | 30    |
| H(14A) | 13172 | 5238  | 7595 | 65    |
| H(14B) | 11918 | 5251  | 6193 | 65    |
| H(14C) | 11535 | 5115  | 7576 | 65    |
| H(16A) | 14723 | 13783 | 4123 | 58    |
| H(16B) | 15616 | 12715 | 5192 | 58    |
| H(16C) | 14400 | 13591 | 5529 | 58    |
| H(18A) | 14274 | 1724  | 1485 | 61    |
| H(18B) | 15522 | 2814  | 1736 | 61    |
| H(18C) | 14583 | 2453  | 234  | 61    |

## Computational Studies of Various Hydroxymethylation Reaction Enol Ether Intermediates

**Method:** After several initial conformational searches (Monte Carlo conformer distribution, Spartan '04), the lowest energy orientations of certain functional groups like the aromatic ester, *N*-carbomethoxy group, the aromatic methyl ether, and the methyl group of the enol ether were consistently lower in energy in the spatial representations shown. It was assumed that a methyl ether could be substituted for a methoxymethyl ether or a benzyl ether on the aromatic ring and that a methyl enol ether could replace the enol or silyl enol ether intermediate without affecting the conformational profile. To further simplify computational assessment of equilibrium geometries, the orientations of these functional groups were frozen in their lowest energy positions. To establish the lowest energy conformation for the eight-membered ring, conformers were drawn that contained the two possible relationships of the nucleophilic *cis*-olefin. Another conformational search was performed to find variations in ring topology. Geometries of the resulting structures were optimized first by semi-empirical methods (AM1), and then by using Hartree-Fock (HF/6-31G\*) theory. Because software limitations led to insurmountable problems when attempts were made to characterize stationary points, we could not calculate frequencies to determine the nature of the stationary point represented by each of the low-energy molecular geometries. Consequently, because the identification of the low-energy geometries was repeatable, we must reasonably conclude that they are minima, and that the global minimum structure is the lowest energy minimum found. Lastly, the HF/6-31G\* geometries were analyzed at the HF/6-31G\*\* level of theory to produce the energies shown. For each low-energy conformation of the intermediates in question, pertinent details from the Spartan output file, Cartesian coordinates, and energies are provided.

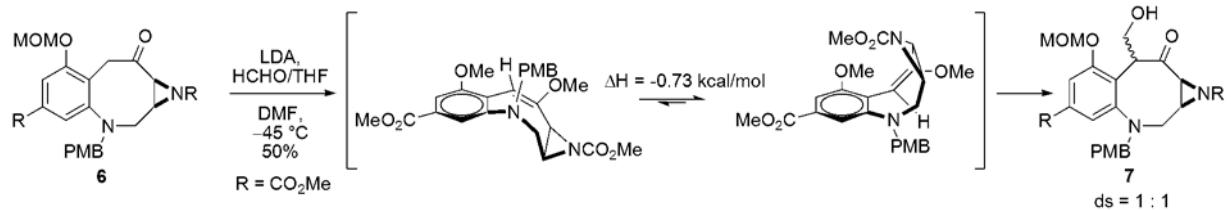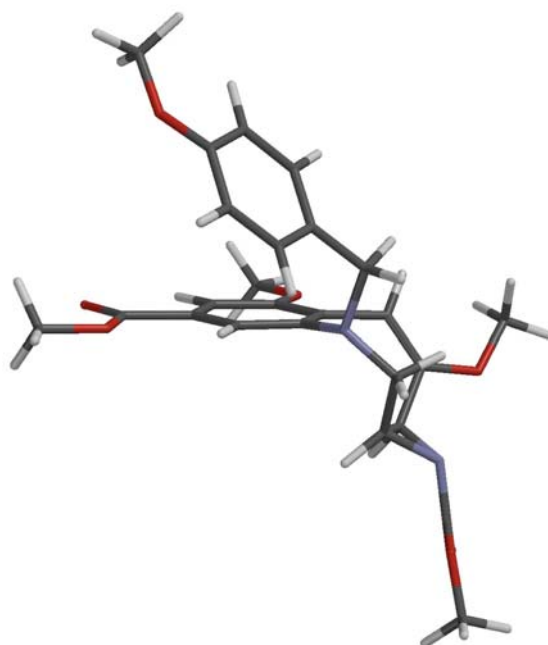

Macintosh (OS-X ppc)

-----  
User input:  
-----

```

$molecule
READ
$end
$rem
EXCHANGE          HF
BASIS              6-31G**
VARTHRESH         0
SMALL_PROD_XCMAT  10
SYMMETRY          FALSE
SYM_IGNORE        TRUE
GUI               GUI_SPARTAN
TERSE_OUTPUT      TRUE
SCF_GUESS         READ
$end

```

```

-----
Processing $rem in /Applications/Spartan 04/Spartan
04.app/Contents/MacOS/../../SharedSupport//qchem/aux/../../config/preferences.
(Site specific preferences.)

```

```

... THRESH          9
... SCF_CONVERGENCE 7
... SMALL_PROD_XCMAT 9
... BASIS_LIN_DEP_THRESH 5
... ONEEXE_SPAR TRUE
... GUI             GUI_SPARTAN
... TERSE_OUTPUT   TRUE

```

Processing \$rem in system registry

```

... MEM_TOTAL 768 # MB

```

Processing \$rem in the input.

```

... EXCHANGE          HF
... BASIS              6-31G**
... VARTHRESH         0
... SMALL_PROD_XCMAT  10
... SYMMETRY          FALSE
... SYM_IGNORE        TRUE
... GUI               GUI_SPARTAN
... TERSE_OUTPUT      TRUE
... SCF_GUESS         READ

```

Total Memory Limit in MB = 768

Mega-Array Size in MB = 31  
-----

## Standard Nuclear Orientation (Angstroms)

| I | Atom | X        | Y         | Z        |
|---|------|----------|-----------|----------|
| 1 | C    | 1.519570 | .443392   | 1.950407 |
| 2 | C    | 1.859990 | -1.933279 | -.131811 |
| 3 | C    | .997101  | -.758363  | 2.693328 |
| 4 | H    | 2.560611 | .252965   | 1.711548 |
| 5 | H    | 1.503436 | 1.299400  | 2.619703 |
| 6 | C    | .483445  | -1.423120 | -.390448 |
| 7 | C    | 1.422880 | -2.119523 | 2.284686 |



|    |   |           |           |           |
|----|---|-----------|-----------|-----------|
| 8  | H | .021278   | -.665169  | 3.140130  |
| 9  | N | 1.996678  | -1.487892 | 3.432088  |
| 10 | H | .744528   | -2.933084 | 2.480117  |
| 11 | C | -2.159828 | -.702023  | -.922151  |
| 12 | C | -.359937  | -2.253011 | -1.156907 |
| 13 | C | -.020211  | -.209243  | .074209   |
| 14 | C | -1.351646 | .126547   | -.177879  |
| 15 | C | -1.662073 | -1.898820 | -1.427369 |
| 16 | O | .205472   | -3.399270 | -1.596092 |
| 17 | H | -1.725333 | 1.051564  | .206755   |
| 18 | H | -2.311977 | -2.521249 | -2.006661 |
| 19 | C | -3.578122 | -.361554  | -1.227320 |
| 20 | N | .740263   | .787960   | .766323   |
| 21 | O | -4.290615 | -1.035558 | -1.905333 |
| 22 | O | -3.974169 | .769225   | -.668184  |
| 23 | C | -5.304184 | 1.180630  | -.925736  |
| 24 | H | -5.426250 | 2.117809  | -.405169  |
| 25 | H | -6.007048 | .448718   | -.553375  |
| 26 | H | -5.459560 | 1.318488  | -1.986225 |
| 27 | C | -.550719  | -4.301048 | -2.354444 |
| 28 | H | -.888065  | -3.855065 | -3.284044 |
| 29 | H | -1.408609 | -4.664482 | -1.799037 |
| 30 | H | .105697   | -5.129387 | -2.575600 |
| 31 | C | 1.783748  | -1.986274 | 4.701337  |
| 32 | O | 1.786164  | -3.139559 | 4.991508  |
| 33 | O | 1.616120  | -1.000076 | 5.566366  |
| 34 | C | 1.465426  | -1.370961 | 6.925263  |
| 35 | H | 1.339008  | -.446622  | 7.466873  |
| 36 | H | 2.343983  | -1.893520 | 7.275167  |
| 37 | H | .598677   | -2.003183 | 7.053706  |
| 38 | C | 2.284434  | -2.289623 | 1.072699  |
| 39 | O | 3.466164  | -2.844538 | 1.372069  |
| 40 | H | 2.457681  | -2.134269 | -1.000250 |
| 41 | C | 4.375141  | -3.117191 | .342295   |
| 42 | H | 4.668561  | -2.208089 | -.171958  |
| 43 | H | 3.957339  | -3.816119 | -.374054  |
| 44 | H | 5.240478  | -3.557721 | .813597   |
| 45 | C | 1.485881  | 1.691913  | -.111103  |
| 46 | H | 2.065042  | 2.340716  | .537263   |
| 47 | C | .622037   | 2.553408  | -1.004497 |
| 48 | H | 2.202533  | 1.140883  | -.719682  |
| 49 | C | -.958484  | 4.189105  | -2.641059 |
| 50 | C | -.186440  | 3.553529  | -.459182  |
| 51 | C | .618966   | 2.403909  | -2.374470 |
| 52 | C | -.161466  | 3.209855  | -3.201402 |
| 53 | C | -.965014  | 4.357593  | -1.255618 |
| 54 | H | -.205239  | 3.693408  | .607566   |
| 55 | H | 1.229187  | 1.642312  | -2.827936 |
| 56 | H | -.132096  | 3.052629  | -4.262296 |
| 57 | H | -1.586632 | 5.126327  | -.835672  |
| 58 | O | -1.756614 | 5.026269  | -3.336639 |
| 59 | C | -1.813080 | 4.927314  | -4.730292 |
| 60 | H | -.843472  | 5.113517  | -5.181109 |
| 61 | H | -2.507423 | 5.686068  | -5.058642 |
| 62 | H | -2.174208 | 3.953427  | -5.045354 |

-----  
Nuclear Repulsion Energy = 3650.5184544506 hartrees

There are 124 alpha and 124 beta electrons  
Requested basis set is 6-31G(d,p)  
There are 220 shells and 650 basis functions

A restricted Hartree-Fock SCF calculation will be  
performed using Pulay DIIS extrapolation  
SCF converges when DIIS error is below 1.0E-07

| Cycle | Energy                  | DIIS Error                         |
|-------|-------------------------|------------------------------------|
| 1     | -1595.9125350766        | 1.22E-04                           |
| 2     | -1595.9133938857        | 7.51E-05                           |
| 3     | -1595.9136871467        | 2.44E-05                           |
| 4     | -1595.9137563597        | 6.08E-06                           |
| 5     | -1595.9137600114        | 2.44E-06                           |
| 6     | -1595.9137608288        | 1.14E-06                           |
| 7     | -1595.9137608989        | 4.77E-07                           |
| 8     | -1595.9137610630        | 2.33E-07                           |
| 9     | <b>-1595.9137611661</b> | 6.93E-08 Convergence criterion met |

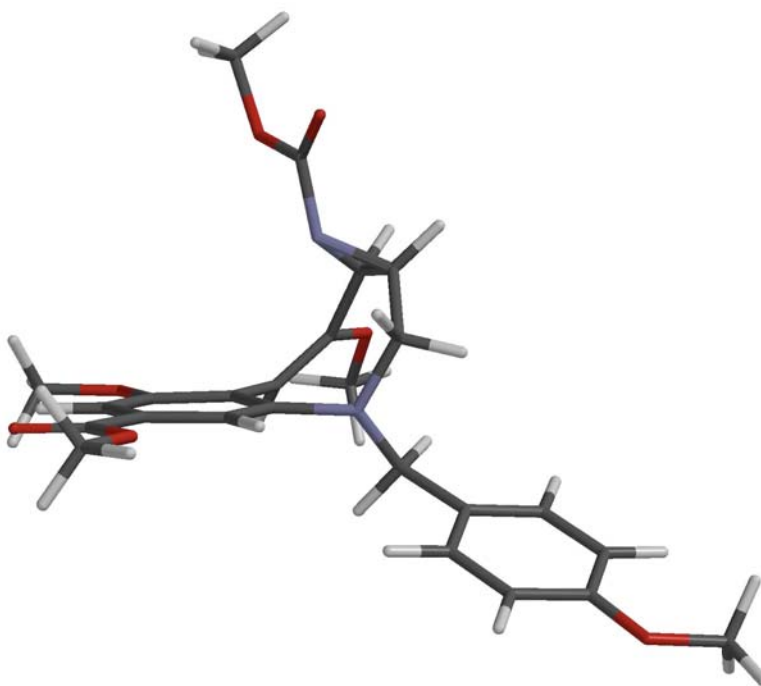

Spartan '04 Quantum Mechanics Module 124

Macintosh (OS-X ppc)

-----  
User input:  
-----

```
$molecule  
READ  
$end  
$rem  
EXCHANGE          HF
```

```

BASIS          6-31G**
VARTHRESH     0
SMALL_PROD_XCMAT 10
SYMMETRY      FALSE
SYM_IGNORE    TRUE
GUI           GUI_SPARTAN
TERSE_OUTPUT  TRUE
SCF_GUESS     READ
$end

```

```

-----
Processing $rem in /Applications/Spartan 04/Spartan
04.app/Contents/MacOS/../../SharedSupport//qchem/aux/../../config/preferences.

```

(Site specific preferences.)

```

... THRESH          9
... SCF_CONVERGENCE 7
... SMALL_PROD_XCMAT 9
... BASIS_LIN_DEP_THRESH 5
... ONEEXE_SPAR TRUE
... GUI            GUI_SPARTAN
... TERSE_OUTPUT  TRUE

```

Processing \$rem in system registry

```

... MEM_TOTAL 768 # MB

```

Processing \$rem in the input.

```

... EXCHANGE      HF
... BASIS         6-31G**
... VARTHRESH     0
... SMALL_PROD_XCMAT 10
... SYMMETRY      FALSE
... SYM_IGNORE    TRUE
... GUI           GUI_SPARTAN
... TERSE_OUTPUT  TRUE
... SCF_GUESS     READ

```

Total Memory Limit in MB = 768

Mega-Array Size in MB = 31

```

-----
Standard Nuclear Orientation (Angstroms)

```

| I  | Atom | X         | Y         | Z         |
|----|------|-----------|-----------|-----------|
| 1  | C    | -.247123  | .608781   | 1.566271  |
| 2  | C    | -.551454  | 2.060146  | 1.235448  |
| 3  | H    | -1.174648 | .173801   | 1.924967  |
| 4  | H    | .444344   | .593420   | 2.399783  |
| 5  | C    | -.403940  | .263116   | -1.790903 |
| 6  | C    | -.155040  | 2.846752  | .020302   |
| 7  | H    | -.658984  | 2.666413  | 2.122580  |
| 8  | N    | -1.487273 | 2.351729  | .195888   |
| 9  | H    | -.016749  | 3.897661  | .209288   |
| 10 | C    | -2.215515 | -1.844099 | -1.604048 |
| 11 | C    | -1.192164 | -.110266  | -2.893961 |
| 12 | C    | -.501102  | -.477536  | -.618106  |
| 13 | C    | -1.417461 | -1.523332 | -.527850  |
| 14 | C    | -2.096775 | -1.144527 | -2.801853 |
| 15 | O    | -1.000571 | .618670   | -4.014935 |
| 16 | H    | -1.482116 | -2.077623 | .386756   |
| 17 | H    | -2.719497 | -1.429207 | -3.624512 |
| 18 | C    | -3.210399 | -2.952294 | -1.551970 |

|    |   |           |           |           |
|----|---|-----------|-----------|-----------|
| 19 | N | .305761   | -.222212  | .524074   |
| 20 | O | -3.903264 | -3.266846 | -2.469493 |
| 21 | O | -3.252955 | -3.560205 | -.377152  |
| 22 | C | -4.179910 | -4.621930 | -.239813  |
| 23 | H | -3.961007 | -5.410275 | -.945416  |
| 24 | H | -5.187942 | -4.268131 | -.400992  |
| 25 | H | -4.066360 | -4.981314 | .771029   |
| 26 | C | -1.780541 | .365553   | -5.149610 |
| 27 | H | -2.835590 | .510332   | -4.944312 |
| 28 | H | -1.622625 | -.639728  | -5.525895 |
| 29 | H | -1.462783 | 1.077900  | -5.896366 |
| 30 | C | -2.579496 | 3.169584  | .392626   |
| 31 | O | -3.282096 | 3.133378  | 1.352989  |
| 32 | O | -2.768354 | 3.968649  | -.641340  |
| 33 | C | -3.914043 | 4.800369  | -.597801  |
| 34 | H | -3.896258 | 5.367794  | -1.514956 |
| 35 | H | -3.872034 | 5.462851  | .254679   |
| 36 | H | -4.812991 | 4.203712  | -.543241  |
| 37 | C | .539265   | 1.389926  | -1.956590 |
| 38 | C | .674164   | 2.439317  | -1.159195 |
| 39 | H | 1.160579  | 1.328841  | -2.828671 |
| 40 | O | 1.612968  | 3.402152  | -1.321877 |
| 41 | C | 2.537505  | 3.313906  | -2.368849 |
| 42 | H | 3.188418  | 4.169491  | -2.267095 |
| 43 | H | 2.043716  | 3.351173  | -3.333527 |
| 44 | H | 3.124164  | 2.404022  | -2.300764 |
| 45 | C | 1.754463  | -.257932  | .412121   |
| 46 | H | 2.190513  | .736510   | .365812   |
| 47 | H | 1.994845  | -.742314  | -.526480  |
| 48 | C | 2.410456  | -1.018594 | 1.550622  |
| 49 | C | 3.671028  | -2.450991 | 3.605237  |
| 50 | C | 2.034904  | -2.331059 | 1.850573  |
| 51 | C | 3.419502  | -.455063  | 2.302350  |
| 52 | C | 4.056123  | -1.154383 | 3.327596  |
| 53 | C | 2.650300  | -3.037912 | 2.854509  |
| 54 | H | 1.246873  | -2.795519 | 1.285684  |
| 55 | H | 3.732964  | .555146   | 2.100538  |
| 56 | H | 4.833564  | -.670291  | 3.886419  |
| 57 | H | 2.363244  | -4.047626 | 3.083232  |
| 58 | O | 4.209693  | -3.227202 | 4.569307  |
| 59 | C | 5.227266  | -2.714787 | 5.379807  |
| 60 | H | 6.101506  | -2.443607 | 4.796866  |
| 61 | H | 5.491683  | -3.503758 | 6.067905  |
| 62 | H | 4.889253  | -1.850530 | 5.942318  |

-----  
Nuclear Repulsion Energy = 3632.5208644261 hartrees

There are 124 alpha and 124 beta electrons

Requested basis set is 6-31G(d,p)

There are 220 shells and 650 basis functions

A restricted Hartree-Fock SCF calculation will be

performed using Pulay DIIS extrapolation

SCF converges when DIIS error is below 1.0E-07

| Cycle | Energy           | DIIS Error |
|-------|------------------|------------|
| 1     | -1595.9136785930 | 1.23E-04   |

|   |                         |          |                           |
|---|-------------------------|----------|---------------------------|
| 2 | -1595.9145616149        | 7.53E-05 |                           |
| 3 | -1595.9148511866        | 2.43E-05 |                           |
| 4 | -1595.9149212034        | 5.71E-06 |                           |
| 5 | -1595.9149242595        | 2.28E-06 |                           |
| 6 | -1595.9149248226        | 1.00E-06 |                           |
| 7 | -1595.9149246506        | 4.13E-07 |                           |
| 8 | -1595.9149245694        | 2.12E-07 |                           |
| 9 | <b>-1595.9149245540</b> | 7.20E-08 | Convergence criterion met |

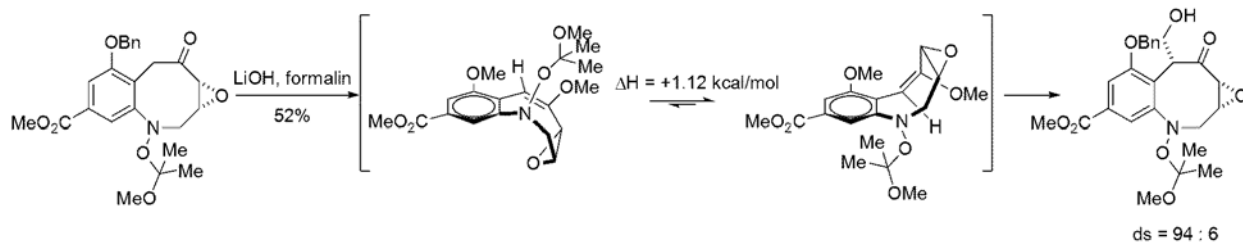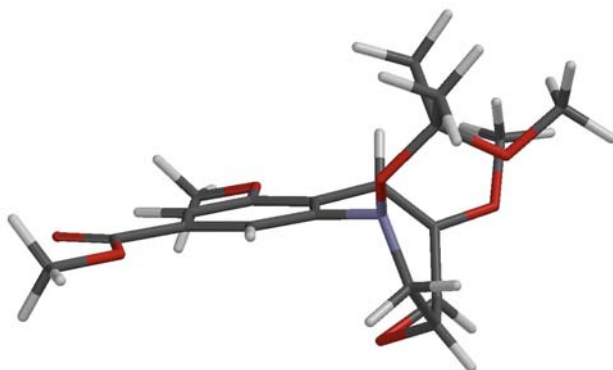

Spartan '04 Quantum Mechanics Module 124

Macintosh (OS-X ppc)

-----  
User input:

-----  
\$molecule  
READ  
\$end  
\$rem  
EXCHANGE HF  
BASIS 6-31G\*\*  
SYMMETRY FALSE  
SYM\_IGNORE TRUE  
MEM\_STATIC 57  
GUI GUI\_SPARTAN  
TERSE\_OUTPUT TRUE  
SCF\_GUESS READ  
\$end

-----  
 Processing \$rem in /Applications/Spartan 04/Spartan  
 04.app/Contents/MacOS/./SharedSupport//qchem/aux/./config/preferences.  
 (Site specific preferences.)

```
... THRESH          9
... SCF_CONVERGENCE 7
... SMALL_PROD_XCMAT 9
... BASIS_LIN_DEP_THRESH 5
... ONEEXE_SPAR TRUE
... GUI             GUI_SPARTAN
... TERSE_OUTPUT   TRUE
```

Processing \$rem in system registry

```
... MEM_TOTAL 1999 # MB
```

Processing \$rem in the input.

```
... JOBTYP          FREQ
... EXCHANGE        HF
... BASIS            6-31G**
... SYMMETRY        FALSE
... SYM_IGNORE       TRUE
... MEM_STATIC       57
... GUI             GUI_SPARTAN
... TERSE_OUTPUT    TRUE
... SCF_GUESS        READ
```

Total Memory Limit in MB = 1999

Mega-Array Size in MB = 57

-----

| Standard Nuclear Orientation (Angstroms) |      |           |           |           |
|------------------------------------------|------|-----------|-----------|-----------|
| I                                        | Atom | X         | Y         | Z         |
| 1                                        | C    | .203962   | 1.765994  | 1.693453  |
| 2                                        | C    | 1.174190  | -1.666087 | .974915   |
| 3                                        | C    | .520401   | .999696   | 2.951037  |
| 4                                        | H    | .892498   | 2.594907  | 1.637083  |
| 5                                        | H    | -.802134  | 2.173089  | 1.790582  |
| 6                                        | C    | -.186435  | -1.328731 | .509699   |
| 7                                        | C    | 1.222598  | -.272440  | 3.093825  |
| 8                                        | O    | -.168397  | -.185962  | 3.239599  |
| 9                                        | C    | -2.740329 | -.802137  | -.468613  |
| 10                                       | C    | -1.091222 | -2.376829 | .255540   |
| 11                                       | C    | -.588373  | -.030530  | .239659   |
| 12                                       | C    | -1.868772 | .237933   | -.241107  |
| 13                                       | C    | -2.353763 | -2.119734 | -.224731  |
| 14                                       | O    | -.619393  | -3.617490 | .503035   |
| 15                                       | H    | -2.156699 | 1.246563  | -.451511  |
| 16                                       | H    | -3.057664 | -2.902280 | -.418639  |
| 17                                       | C    | -4.120096 | -.578457  | -.984862  |
| 18                                       | N    | .348916   | 1.032847  | .444183   |
| 19                                       | O    | -4.897434 | -1.454864 | -1.205477 |
| 20                                       | O    | -4.404918 | .699822   | -1.177830 |
| 21                                       | C    | -5.700206 | .999614   | -1.664159 |
| 22                                       | H    | -5.738763 | 2.074143  | -1.752977 |
| 23                                       | H    | -6.454537 | .652955   | -.972759  |
| 24                                       | H    | -5.860237 | .537431   | -2.627581 |
| 25                                       | C    | -1.453976 | -4.725863 | .317208   |
| 26                                       | H    | -1.763564 | -4.822075 | -.718232  |
| 27                                       | H    | -2.332376 | -4.669465 | .950723   |

|    |   |          |           |           |
|----|---|----------|-----------|-----------|
| 28 | H | -.870084 | -5.590641 | .595236   |
| 29 | C | 1.794494 | -1.147679 | 2.023987  |
| 30 | O | 3.069800 | -1.421191 | 2.379384  |
| 31 | H | 1.678384 | -2.408735 | .387286   |
| 32 | C | 3.861451 | -2.237511 | 1.564800  |
| 33 | H | 3.938995 | -1.833270 | .561226   |
| 34 | H | 3.465717 | -3.246018 | 1.515358  |
| 35 | H | 4.840021 | -2.260294 | 2.020950  |
| 36 | O | .164582  | 1.980313  | -.568995  |
| 37 | H | .586626  | 1.664718  | 3.799670  |
| 38 | H | 1.747517 | -.427567  | 4.021441  |
| 39 | C | 1.315231 | 2.221216  | -1.328897 |
| 40 | O | 2.233486 | 2.816206  | -.452578  |
| 41 | C | .854324  | 3.226928  | -2.377488 |
| 42 | C | 1.844433 | .936213   | -1.957163 |
| 43 | C | 3.566260 | 2.956521  | -.842884  |
| 44 | H | 4.047133 | 3.555523  | -.082004  |
| 45 | H | 3.667299 | 3.468909  | -1.795417 |
| 46 | H | 4.076710 | 2.001211  | -.903128  |
| 47 | H | 1.678449 | 3.528566  | -3.013675 |
| 48 | H | .456866  | 4.103681  | -1.881807 |
| 49 | H | .081863  | 2.794714  | -3.002068 |
| 50 | H | 2.633399 | 1.147322  | -2.670114 |
| 51 | H | 1.039620 | .441751   | -2.487243 |
| 52 | H | 2.224146 | .267062   | -1.197939 |

-----  
Nuclear Repulsion Energy = 2733.4455745264 hartrees  
There are 101 alpha and 101 beta electrons  
Requested basis set is 6-31G(d,p)  
There are 183 shells and 530 basis functions

A restricted Hartree-Fock SCF calculation will be  
performed using Pulay DIIS extrapolation  
SCF converges when DIIS error is below 1.0E-07

| Cycle | Energy                  | DIIS Error                         |
|-------|-------------------------|------------------------------------|
| 1     | -1312.4288651131        | 5.05E-09                           |
| 2     | <b>-1312.4288652094</b> | 2.33E-08 Convergence criterion met |

-----

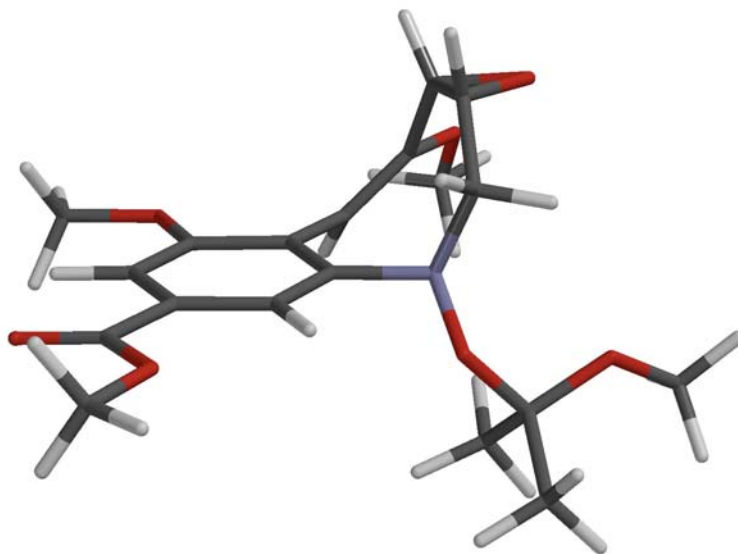

Spartan '04 Quantum Mechanics Module 124

Macintosh (OS-X ppc)

-----  
 User input:  
 -----

```
$molecule
READ
$end
$rem
EXCHANGE          HF
BASIS              6-31G**
VARTHRESH         0
SMALL_PROD_XCMAT  10
SYMMETRY          FALSE
SYM_IGNORE        TRUE
GUI               GUI_SPARTAN
TERSE_OUTPUT      TRUE
SCF_GUESS         READ
$end
```

-----  
 Processing \$rem in /Applications/Spartan 04/Spartan  
 04.app/Contents/MacOS/../../SharedSupport//qchem/aux/../../config/preferences.  
 (Site specific preferences.)

```
... THRESH          9
... SCF_CONVERGENCE 7
... SMALL_PROD_XCMAT 9
... BASIS_LIN_DEP_THRESH 5
... ONEEXE_SPAR TRUE
... GUI             GUI_SPARTAN
... TERSE_OUTPUT    TRUE
```

Processing \$rem in system registry

```
... MEM_TOTAL 768 # MB
```

Processing \$rem in the input.

```
... EXCHANGE        HF
... BASIS           6-31G**
... VARTHRESH       0
```



```

... SMALL_PROD_XCMAT  10
... SYMMETRY           FALSE
... SYM_IGNORE         TRUE
... GUI                GUI_SPARTAN
... TERSE_OUTPUT       TRUE
... SCF_GUESS          READ

```

Total Memory Limit in MB = 768

Mega-Array Size in MB = 31

| -----                                    |      |           |           |           |
|------------------------------------------|------|-----------|-----------|-----------|
| Standard Nuclear Orientation (Angstroms) |      |           |           |           |
| I                                        | Atom | X         | Y         | Z         |
| -----                                    |      |           |           |           |
| 1                                        | C    | .380969   | -2.172458 | -.949486  |
| 2                                        | C    | 1.209885  | -1.837348 | -2.169713 |
| 3                                        | H    | 1.029481  | -2.640133 | -.210933  |
| 4                                        | H    | -.366159  | -2.891086 | -1.244786 |
| 5                                        | C    | .897972   | 1.047391  | -.405931  |
| 6                                        | C    | 1.218236  | -.621859  | -2.977087 |
| 7                                        | O    | .546664   | -1.771324 | -3.406083 |
| 8                                        | C    | 1.866202  | .566693   | 2.163069  |
| 9                                        | C    | 1.743234  | 1.977309  | .234795   |
| 10                                       | C    | .548989   | -.105274  | .278580   |
| 11                                       | C    | 1.037228  | -.351530  | 1.563368  |
| 12                                       | C    | 2.225513  | 1.740766  | 1.499813  |
| 13                                       | O    | 2.018116  | 3.089855  | -.478143  |
| 14                                       | H    | .742574   | -1.240289 | 2.080752  |
| 15                                       | H    | 2.870476  | 2.432674  | 2.000454  |
| 16                                       | C    | 2.414622  | .360401   | 3.534108  |
| 17                                       | N    | -.324782  | -1.044603 | -.356251  |
| 18                                       | O    | 3.136105  | 1.134476  | 4.082539  |
| 19                                       | O    | 2.021192  | -.774668  | 4.088015  |
| 20                                       | C    | 2.495709  | -1.048284 | 5.394237  |
| 21                                       | H    | 2.172649  | -.281194  | 6.083083  |
| 22                                       | H    | 3.574850  | -1.103690 | 5.401569  |
| 23                                       | H    | 2.070013  | -2.001212 | 5.666975  |
| 24                                       | C    | 2.838091  | 4.082416  | .073416   |
| 25                                       | H    | 3.831660  | 3.702147  | .284815   |
| 26                                       | H    | 2.409582  | 4.492075  | .981826   |
| 27                                       | H    | 2.906821  | 4.861552  | -.670944  |
| 28                                       | C    | .355258   | 1.392043  | -1.736491 |
| 29                                       | C    | .417201   | .629156   | -2.816429 |
| 30                                       | H    | -.097573  | 2.362735  | -1.800368 |
| 31                                       | O    | -.092224  | .946506   | -4.021317 |
| 32                                       | C    | -.838400  | 2.119801  | -4.175015 |
| 33                                       | H    | -1.181188 | 2.126488  | -5.198754 |
| 34                                       | H    | -.231014  | 3.000332  | -3.993825 |
| 35                                       | H    | -1.693609 | 2.130895  | -3.507928 |
| 36                                       | O    | -1.167238 | -1.582771 | .621857   |
| 37                                       | H    | 2.117660  | -2.418835 | -2.219315 |
| 38                                       | H    | 2.122207  | -.426630  | -3.535095 |
| 39                                       | C    | -2.529077 | -1.462429 | .312767   |
| 40                                       | C    | -3.233506 | -2.052176 | 1.528854  |
| 41                                       | O    | -2.736585 | -2.274952 | -.807029  |
| 42                                       | C    | -2.913937 | -.005727  | .075893   |
| 43                                       | H    | -4.307926 | -2.059106 | 1.383868  |
| 44                                       | H    | -3.011859 | -1.471792 | 2.416695  |

|    |   |           |           |           |
|----|---|-----------|-----------|-----------|
| 45 | H | -2.895920 | -3.069994 | 1.678928  |
| 46 | H | -3.989351 | .104495   | -.004442  |
| 47 | H | -2.451381 | .372025   | -.824729  |
| 48 | H | -2.579895 | .590567   | .916458   |
| 49 | C | -3.912526 | -2.148167 | -1.549033 |
| 50 | H | -4.802280 | -2.247845 | -.932988  |
| 51 | H | -3.904869 | -2.951875 | -2.271438 |
| 52 | H | -3.957897 | -1.205547 | -2.083180 |

-----  
Nuclear Repulsion Energy = 2720.6612089095 hartrees  
There are 101 alpha and 101 beta electrons  
Requested basis set is 6-31G(d,p)  
There are 183 shells and 530 basis functions

A restricted Hartree-Fock SCF calculation will be  
performed using Pulay DIIS extrapolation  
SCF converges when DIIS error is below 1.0E-07

| Cycle | Energy                  | DIIS Error                         |
|-------|-------------------------|------------------------------------|
| 1     | -1312.4261554157        | 1.27E-04                           |
| 2     | -1312.4268304166        | 7.43E-05                           |
| 3     | -1312.4270275329        | 2.59E-05                           |
| 4     | -1312.4270796194        | 6.04E-06                           |
| 5     | -1312.4270822622        | 2.51E-06                           |
| 6     | -1312.4270827999        | 1.06E-06                           |
| 7     | -1312.4270828245        | 4.83E-07                           |
| 8     | -1312.4270829969        | 2.17E-07                           |
| 9     | <b>-1312.4270831471</b> | 7.04E-08 Convergence criterion met |

-----

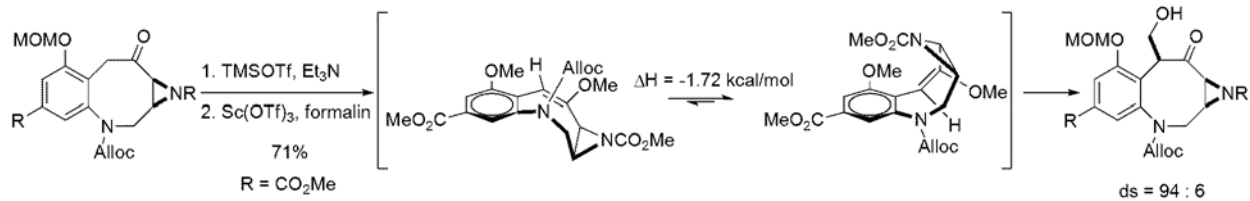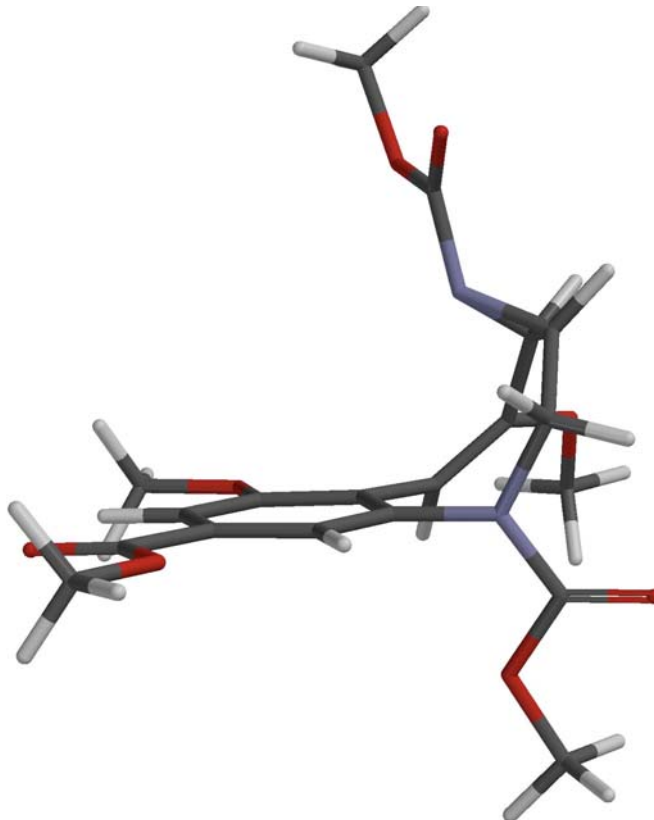

Spartan '04 Quantum Mechanics Module 124

Macintosh (OS-X ppc)

-----  
 User input:  
 -----

```

$molecule
READ
$end
$rem
EXCHANGE          HF
BASIS              6-31G**
VARTHRESH         0
SMALL_PROD_XCMAT  10
SYMMETRY          FALSE
SYM_IGNORE        TRUE
GUI               GUI_SPARTAN
TERSE_OUTPUT      TRUE
SCF_GUESS         READ
$end
  
```

-----

Processing \$rem in /Applications/Spartan 04/Spartan  
 04.app/Contents/MacOS/.../SharedSupport//qchem/aux/.../config/preferences.  
 (Site specific preferences.)

```
... THRESH          9
... SCF_CONVERGENCE 7
... SMALL_PROD_XCMAT 9
... BASIS_LIN_DEP_THRESH 5
... ONEEXE_SPAR TRUE
... GUI              GUI_SPARTAN
... TERSE_OUTPUT    TRUE
```

Processing \$rem in system registry

```
... MEM_TOTAL 768 # MB
```

Processing \$rem in the input.

```
... EXCHANGE        HF
... BASIS            6-31G**
... VARTHRESH       0
... SMALL_PROD_XCMAT 10
... SYMMETRY        FALSE
... SYM_IGNORE      TRUE
... GUI              GUI_SPARTAN
... TERSE_OUTPUT    TRUE
... SCF_GUESS       READ
```

Total Memory Limit in MB = 768

Mega-Array Size in MB = 31

| -----                                    |      |           |           |           |
|------------------------------------------|------|-----------|-----------|-----------|
| Standard Nuclear Orientation (Angstroms) |      |           |           |           |
| I                                        | Atom | X         | Y         | Z         |
| -----                                    |      |           |           |           |
| 1                                        | C    | .735446   | .289582   | 2.565496  |
| 2                                        | C    | .328410   | 1.705294  | 2.221225  |
| 3                                        | H    | -.130985  | -.205687  | 2.990919  |
| 4                                        | H    | 1.504090  | .325467   | 3.319545  |
| 5                                        | C    | .335904   | -.154720  | -.764485  |
| 6                                        | C    | .627348   | 2.470960  | .969929   |
| 7                                        | H    | .241717   | 2.322659  | 3.101887  |
| 8                                        | N    | -.673268  | 1.926799  | 1.227880  |
| 9                                        | H    | .733578   | 3.531589  | 1.119846  |
| 10                                       | C    | -1.327743 | -2.363938 | -.409298  |
| 11                                       | C    | -.525317  | -.575489  | -1.789678 |
| 12                                       | C    | .364849   | -.891168  | .410047   |
| 13                                       | C    | -.463294  | -1.987044 | .597408   |
| 14                                       | C    | -1.355714 | -1.661776 | -1.610330 |
| 15                                       | O    | -.474390  | .150891   | -2.925686 |
| 16                                       | H    | -.416892  | -2.535840 | 1.516784  |
| 17                                       | H    | -2.031573 | -1.987801 | -2.373679 |
| 18                                       | C    | -2.245974 | -3.529290 | -.271800  |
| 19                                       | N    | 1.245573  | -.511255  | 1.467354  |
| 20                                       | C    | 2.577238  | -.787594  | 1.431039  |
| 21                                       | O    | -2.989073 | -3.893344 | -1.129162 |
| 22                                       | O    | -2.155335 | -4.125886 | .905380   |
| 23                                       | C    | -2.998087 | -5.243667 | 1.122983  |
| 24                                       | H    | -2.790771 | -6.020520 | .401478   |
| 25                                       | H    | -4.036336 | -4.954412 | 1.048619  |
| 26                                       | H    | -2.775534 | -5.588751 | 2.120496  |
| 27                                       | C    | -1.326847 | -.164128  | -3.991108 |
| 28                                       | H    | -2.368761 | -.078662  | -3.702058 |

|    |   |           |           |           |
|----|---|-----------|-----------|-----------|
| 29 | H | -1.139336 | -1.163759 | -4.368742 |
| 30 | H | -1.113316 | .554980   | -4.767654 |
| 31 | C | -1.791006 | 2.698730  | 1.466895  |
| 32 | O | -2.444213 | 2.641618  | 2.460236  |
| 33 | O | -2.063498 | 3.475029  | .435464   |
| 34 | C | -3.242687 | 4.255665  | .524013   |
| 35 | H | -3.286404 | 4.821310  | -.393193  |
| 36 | H | -3.196056 | 4.920419  | 1.374142  |
| 37 | H | -4.110811 | 3.619190  | .614423   |
| 38 | O | 3.371320  | -.408345  | 2.242452  |
| 39 | O | 2.900967  | -1.546898 | .396965   |
| 40 | C | 4.267179  | -1.895074 | .275447   |
| 41 | H | 4.331852  | -2.506273 | -.611367  |
| 42 | H | 4.597070  | -2.452236 | 1.140001  |
| 43 | H | 4.877509  | -1.010152 | .167379   |
| 44 | C | 1.244748  | .985405   | -1.008214 |
| 45 | C | 1.410972  | 2.051226  | -.237205  |
| 46 | H | 1.816103  | .910593   | -1.912734 |
| 47 | O | 2.315310  | 3.026951  | -.471152  |
| 48 | C | 3.228307  | 2.901557  | -1.524662 |
| 49 | H | 3.877985  | 3.761603  | -1.462395 |
| 50 | H | 2.723551  | 2.901673  | -2.484467 |
| 51 | H | 3.816195  | 1.995522  | -1.426661 |

-----  
Nuclear Repulsion Energy = 3005.3913879132 hartrees  
There are 107 alpha and 107 beta electrons  
Requested basis set is 6-31G(d,p)  
There are 182 shells and 545 basis functions

A restricted Hartree-Fock SCF calculation will be  
performed using Pulay DIIS extrapolation  
SCF converges when DIIS error is below 1.0E-07

| Cycle | Energy                  | DIIS Error                         |
|-------|-------------------------|------------------------------------|
| 1     | -1440.1139369126        | 1.69E-04                           |
| 2     | -1440.1148716936        | 1.16E-04                           |
| 3     | -1440.1153210753        | 2.97E-05                           |
| 4     | -1440.1153986580        | 8.16E-06                           |
| 5     | -1440.1154025122        | 2.88E-06                           |
| 6     | -1440.1154031677        | 1.39E-06                           |
| 7     | -1440.1154030811        | 6.09E-07                           |
| 8     | -1440.1154030718        | 3.15E-07                           |
| 9     | <b>-1440.1154031169</b> | 9.70E-08 Convergence criterion met |

-----

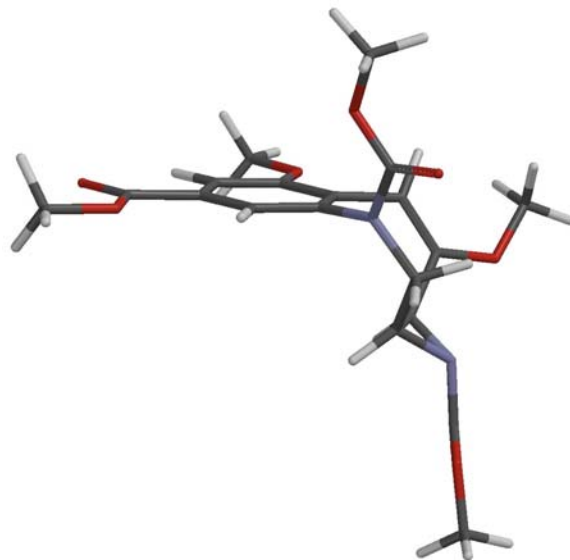

Spartan '04 Quantum Mechanics Module 124

Macintosh (OS-X ppc)

-----  
 User input:  
 -----

```
$molecule
READ
$end
$rem
EXCHANGE          HF
BASIS              6-31G**
SYMMETRY           FALSE
SYM_IGNORE         TRUE
GUI                GUI_SPARTAN
TERSE_OUTPUT       TRUE
SCF_GUESS          READ
$end
```

-----  
 Processing \$rem in /Applications/Spartan 04/Spartan  
 04.app/Contents/MacOS/../../SharedSupport//qchem/aux/../../config/preferences.

(Site specific preferences.)

```
... THRESH          9
... SCF_CONVERGENCE 7
... SMALL_PROD_XCMAT 9
... BASIS_LIN_DEP_THRESH 5
... ONEEXE_SPAR TRUE
... GUI             GUI_SPARTAN
... TERSE_OUTPUT    TRUE
```

Processing \$rem in system registry

```
... MEM_TOTAL 768 # MB
```

Processing \$rem in the input.

```
... EXCHANGE        HF
... BASIS            6-31G**
... SYMMETRY         FALSE
... SYM_IGNORE       TRUE
... GUI              GUI_SPARTAN
... TERSE_OUTPUT     TRUE
```

... SCF\_GUESS READ

Total Memory Limit in MB = 768

Mega-Array Size in MB = 31

-----

| Standard Nuclear Orientation (Angstroms) |      |           |           |           |
|------------------------------------------|------|-----------|-----------|-----------|
| I                                        | Atom | X         | Y         | Z         |
| 1                                        | C    | 1.011897  | 1.936923  | .501896   |
| 2                                        | C    | 1.702635  | -1.166221 | -.400079  |
| 3                                        | C    | .707009   | 1.061170  | 1.693187  |
| 4                                        | H    | 2.082999  | 1.987791  | .378551   |
| 5                                        | H    | .663441   | 2.943125  | .696052   |
| 6                                        | C    | .257928   | -.994027  | -.711900  |
| 7                                        | C    | 1.353681  | -.265062  | 1.858768  |
| 8                                        | H    | -.268861  | 1.173691  | 2.134432  |
| 9                                        | N    | 1.814912  | .868141   | 2.592155  |
| 10                                       | H    | .807789   | -1.001594 | 2.424721  |
| 11                                       | C    | -2.474475 | -.791092  | -1.239312 |
| 12                                       | C    | -.531365  | -2.145773 | -.888336  |
| 13                                       | C    | -.352907  | .246085   | -.838548  |
| 14                                       | C    | -1.718902 | .349007   | -1.081052 |
| 15                                       | C    | -1.880438 | -2.047115 | -1.150636 |
| 16                                       | O    | .126669   | -3.317681 | -.781430  |
| 17                                       | H    | -2.166110 | 1.318849  | -1.162805 |
| 18                                       | H    | -2.496375 | -2.912605 | -1.281841 |
| 19                                       | C    | -3.939185 | -.740297  | -1.513786 |
| 20                                       | N    | .403347   | 1.454028  | -.743852  |
| 21                                       | C    | .717640   | 2.180988  | -1.849239 |
| 22                                       | O    | -4.616307 | -1.707351 | -1.673616 |
| 23                                       | O    | -4.416653 | .492089   | -1.561312 |
| 24                                       | C    | -5.802411 | .632406   | -1.822807 |
| 25                                       | H    | -5.995711 | 1.693613  | -1.816250 |
| 26                                       | H    | -6.383920 | .139289   | -1.057660 |
| 27                                       | H    | -6.049559 | .211542   | -2.786584 |
| 28                                       | C    | -.566766  | -4.523835 | -.948352  |
| 29                                       | H    | -1.004197 | -4.596346 | -1.938417 |
| 30                                       | H    | -1.344975 | -4.639568 | -.201631  |
| 31                                       | H    | .164593   | -5.307936 | -.823673  |
| 32                                       | C    | 1.694741  | .929953   | 3.966572  |
| 33                                       | O    | 1.908971  | .026706   | 4.709311  |
| 34                                       | O    | 1.347857  | 2.146460  | 4.348008  |
| 35                                       | C    | 1.271080  | 2.373868  | 5.744639  |
| 36                                       | H    | 1.021173  | 3.417198  | 5.856082  |
| 37                                       | H    | 2.219391  | 2.161220  | 6.215544  |
| 38                                       | H    | .504323   | 1.754790  | 6.187957  |
| 39                                       | O    | 1.367721  | 3.185158  | -1.814307 |
| 40                                       | O    | .230258   | 1.664596  | -2.966691 |
| 41                                       | C    | .512932   | 2.371386  | -4.160895 |
| 42                                       | H    | .103476   | 3.370056  | -4.118571 |
| 43                                       | H    | .041846   | 1.805657  | -4.949670 |
| 44                                       | H    | 1.579101  | 2.429481  | -4.324958 |
| 45                                       | C    | 2.217175  | -.834934  | .776539   |
| 46                                       | O    | 3.482872  | -1.000953 | 1.174281  |
| 47                                       | H    | 2.294280  | -1.666409 | -1.142735 |
| 48                                       | C    | 4.410425  | -1.560346 | .285111   |
| 49                                       | H    | 4.502107  | -.957934  | -.612202  |

-----

|    |   |          |           |         |
|----|---|----------|-----------|---------|
| 50 | H | 4.129673 | -2.572239 | .013705 |
| 51 | H | 5.355174 | -1.575948 | .806640 |

-----  
Nuclear Repulsion Energy = 2939.5878152767 hartrees  
There are 107 alpha and 107 beta electrons  
Requested basis set is 6-31G(d,p)  
There are 182 shells and 545 basis functions

A restricted Hartree-Fock SCF calculation will be  
performed using Pulay DIIS extrapolation  
SCF converges when DIIS error is below 1.0E-07

| Cycle | Energy                  | DIIS Error                         |
|-------|-------------------------|------------------------------------|
| 1     | -1440.1112223065        | 1.65E-04                           |
| 2     | -1440.1121394800        | 1.13E-04                           |
| 3     | -1440.1125680347        | 2.98E-05                           |
| 4     | -1440.1126448367        | 8.08E-06                           |
| 5     | -1440.1126486964        | 2.84E-06                           |
| 6     | -1440.1126495991        | 1.38E-06                           |
| 7     | -1440.1126497183        | 6.20E-07                           |
| 8     | -1440.1126498120        | 3.15E-07                           |
| 9     | <b>-1440.1126497710</b> | 9.16E-08 Convergence criterion met |

-----

#### References:

1. Pangborn, A. B.; Giardello, M. H.; Grubbs, R. H.; Rosen, R. K.; Timmers, F. J. *Organometallics* **1996**, 15, 1518-1520.
2. Ducept, P.; Gubler, D. A.; Williams, R. M. *Heterocycles* **2006**, 67, 597-619.



7.773  
7.759  
7.748  
7.728  
7.709  
7.691  
7.671  
7.545  
7.521  
7.503  
7.485  
7.450  
7.430  
7.260  
6.959  
6.938

5.350  
5.333  
5.304  
5.290  
5.272  
4.649  
4.641  
4.610  
4.603  
4.202  
4.157  
3.913  
3.875  
3.800  
3.776  
3.765  
3.746  
3.700  
3.583  
3.543  
3.516  
3.489  
3.461  
3.334  
3.317  
3.189  
3.182  
3.172  
3.165  
3.150  
3.133  
2.036

Page S33

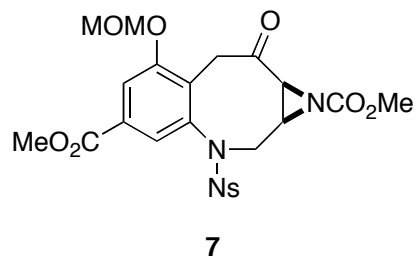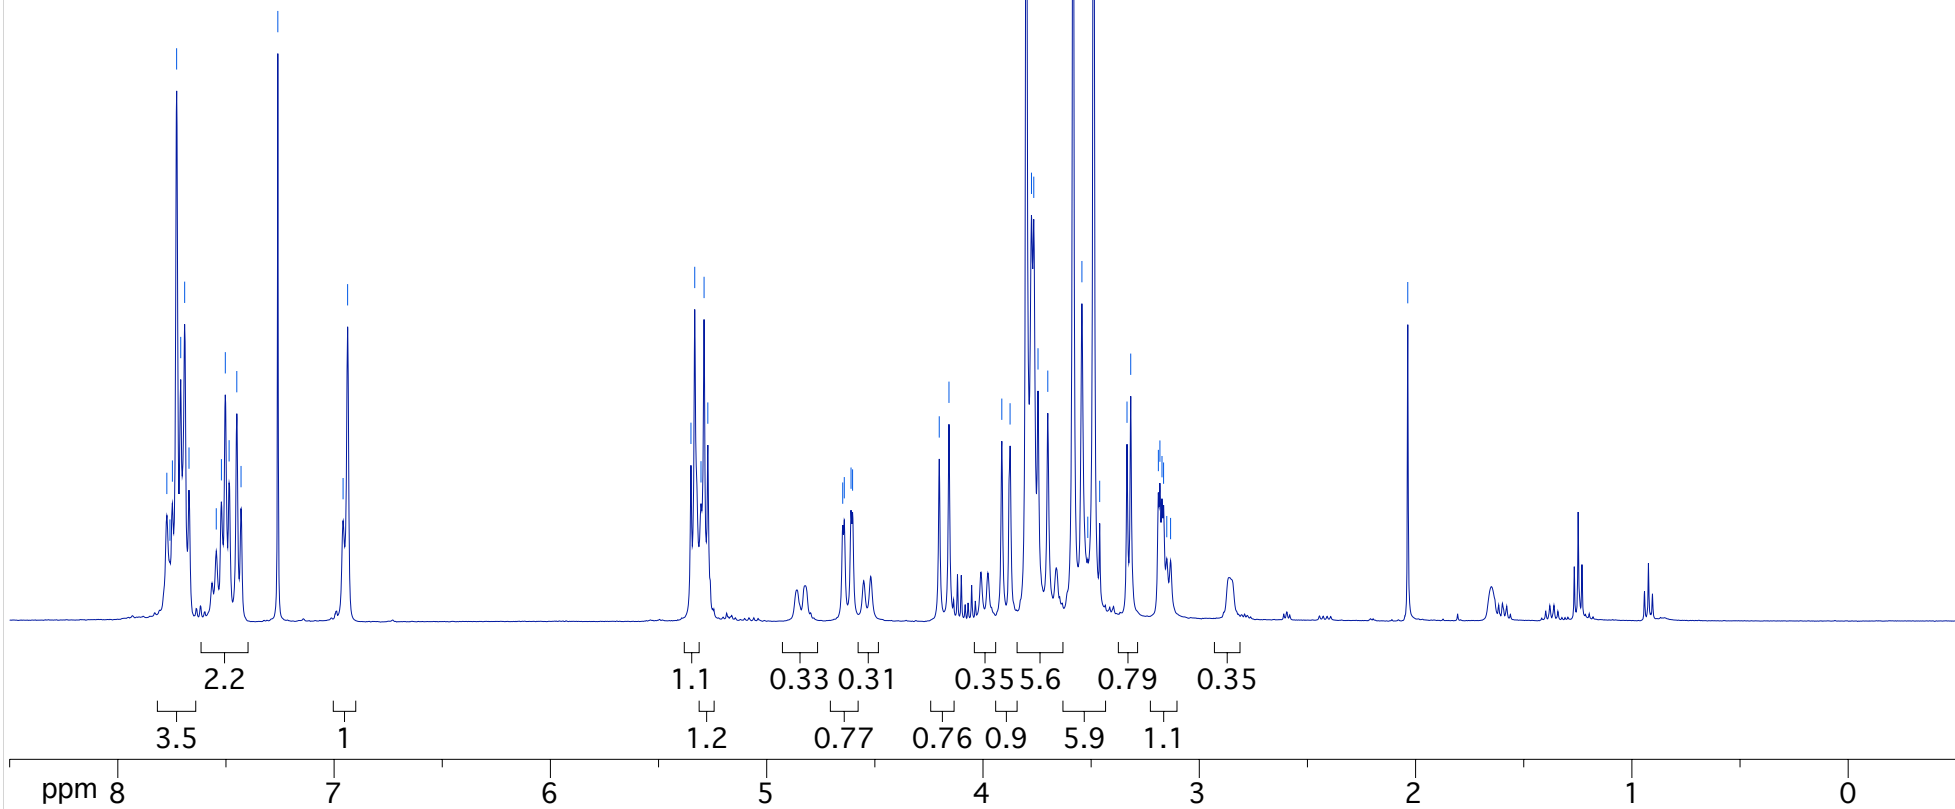

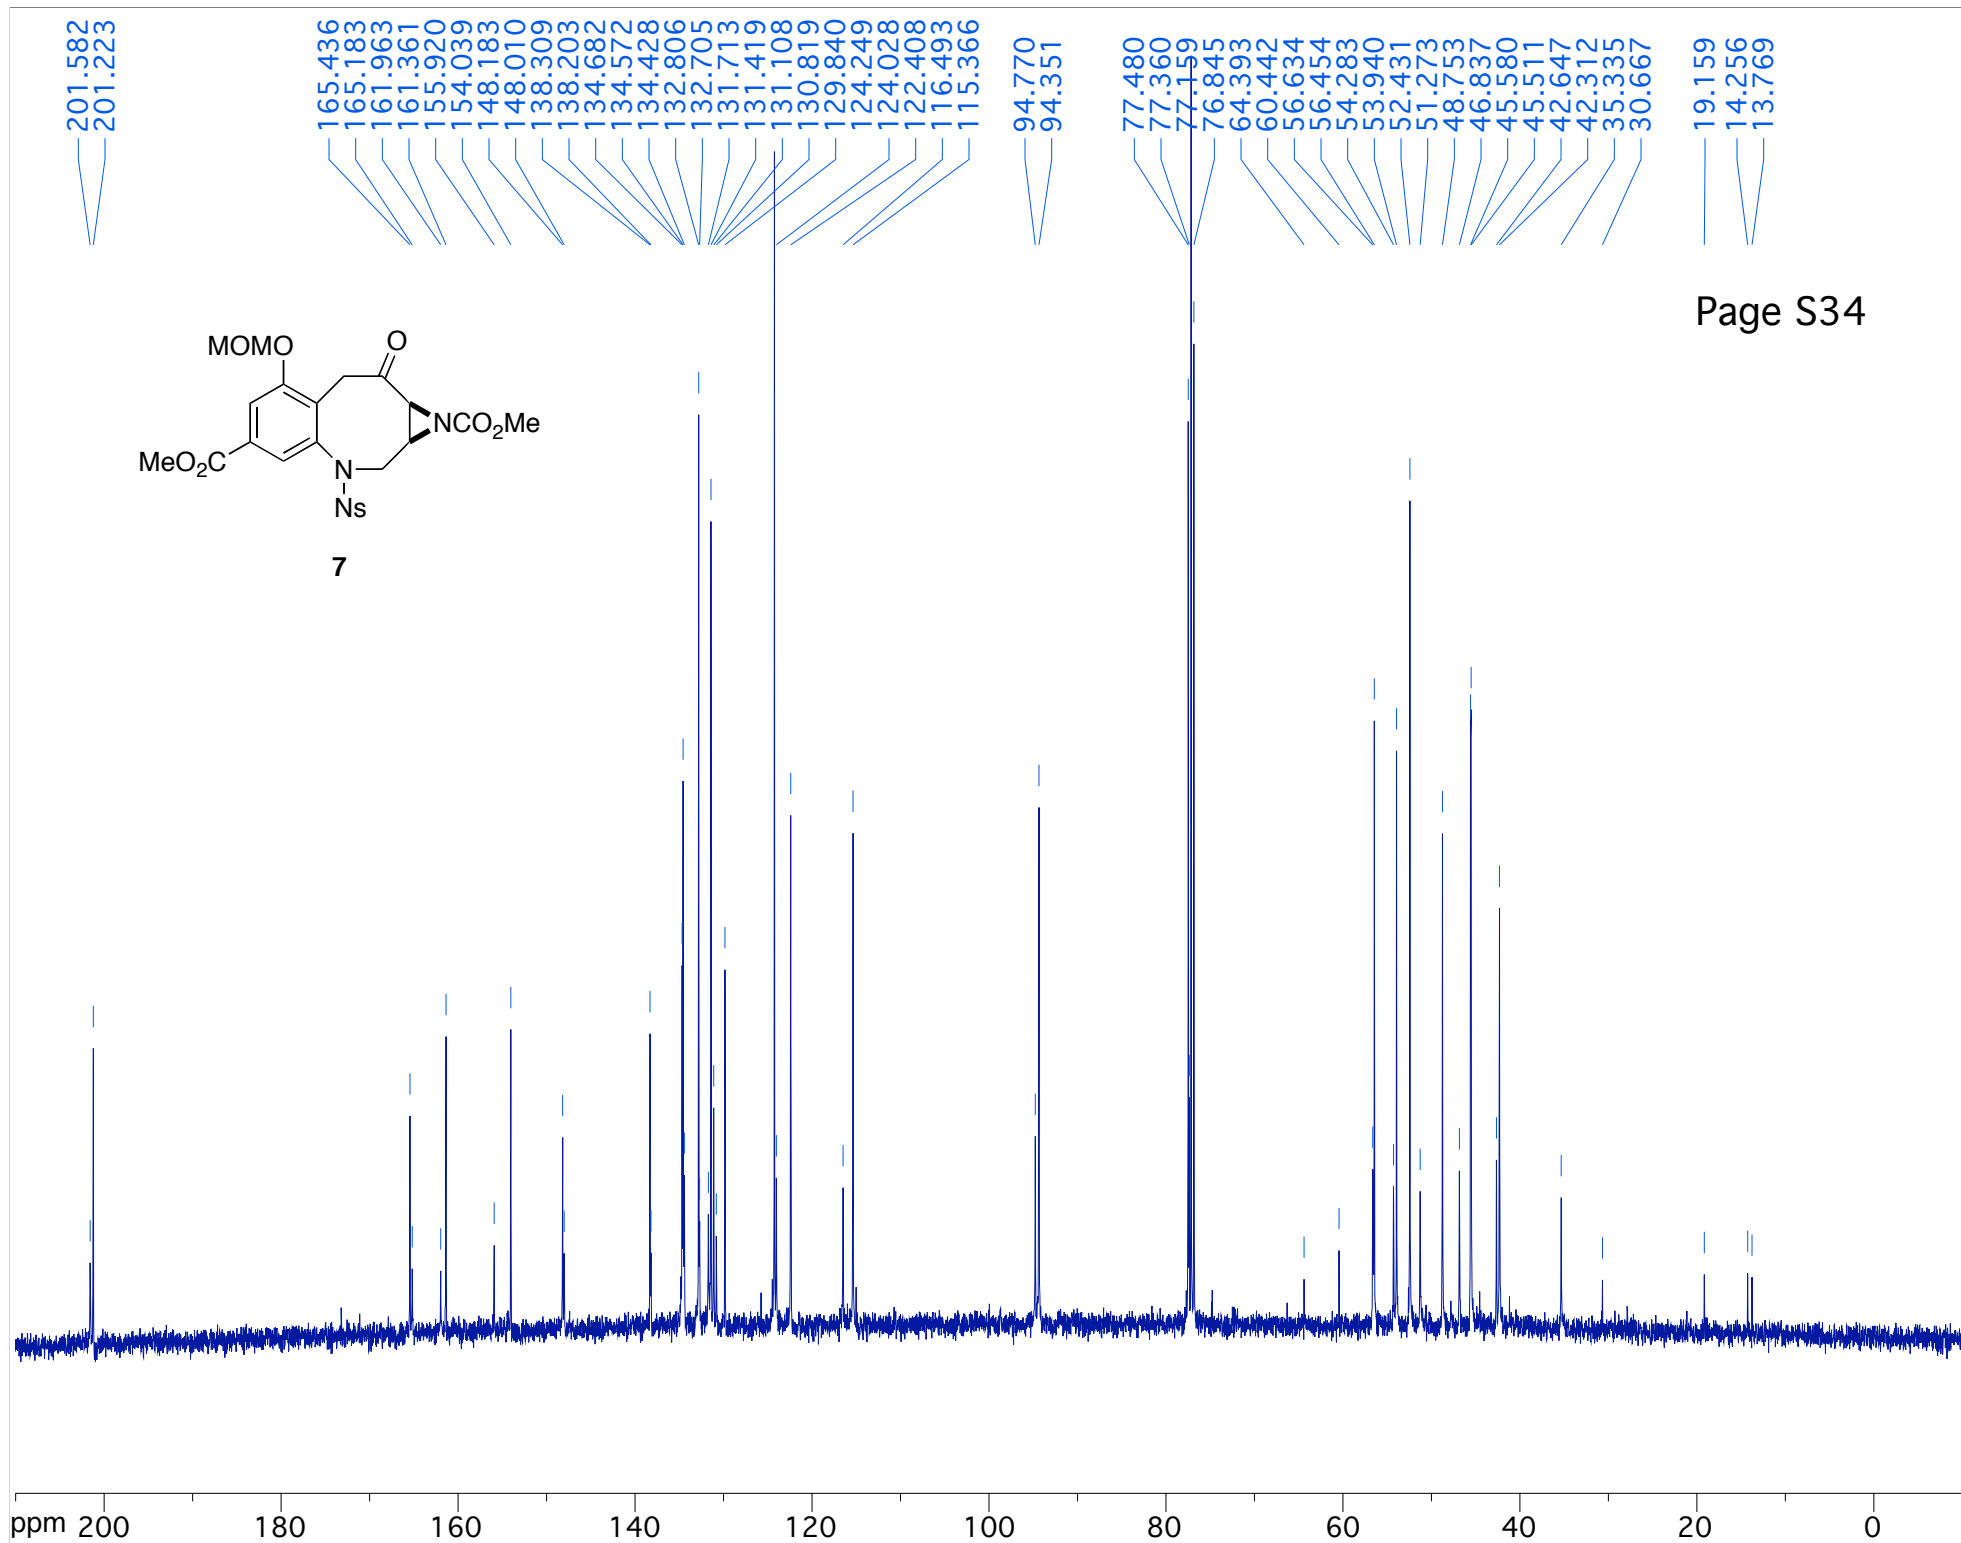

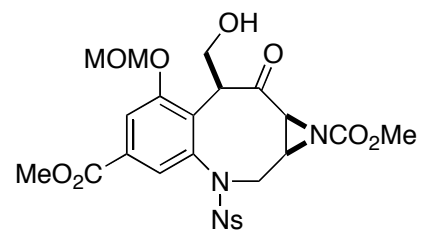

**8**,  $\alpha:\beta = 9:91$

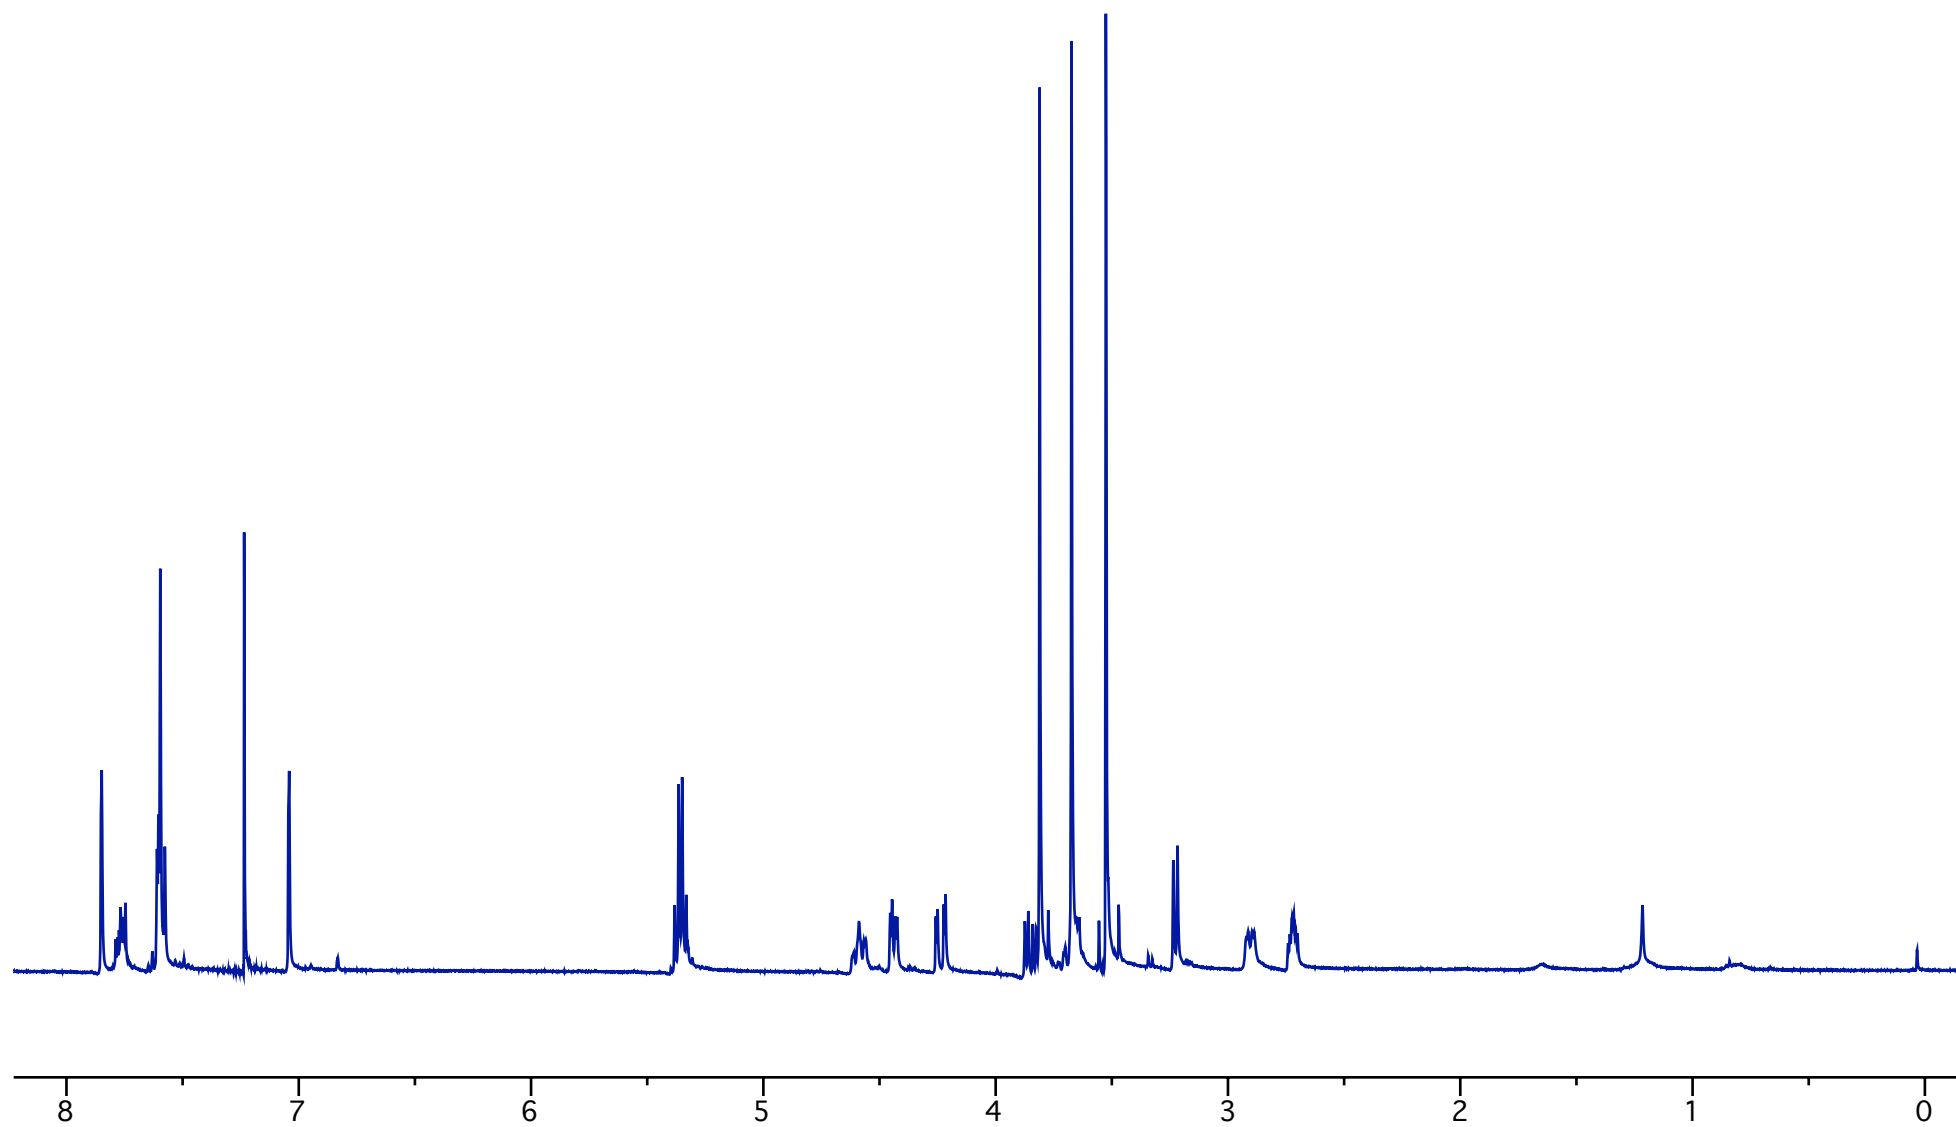

200.046

165.171

162.167

156.613

149.200

137.805

135.143

132.741

132.558

131.992

131.502

129.845

124.251

122.990

115.836

94.955

61.777

57.115

54.329

52.818

52.309

51.852

45.608

40.636

Page S36

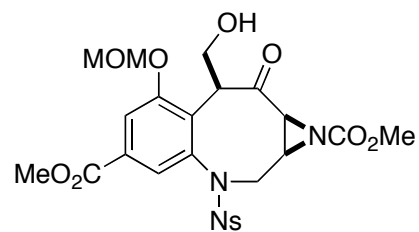

**8**,  $\alpha:\beta = 9:91$

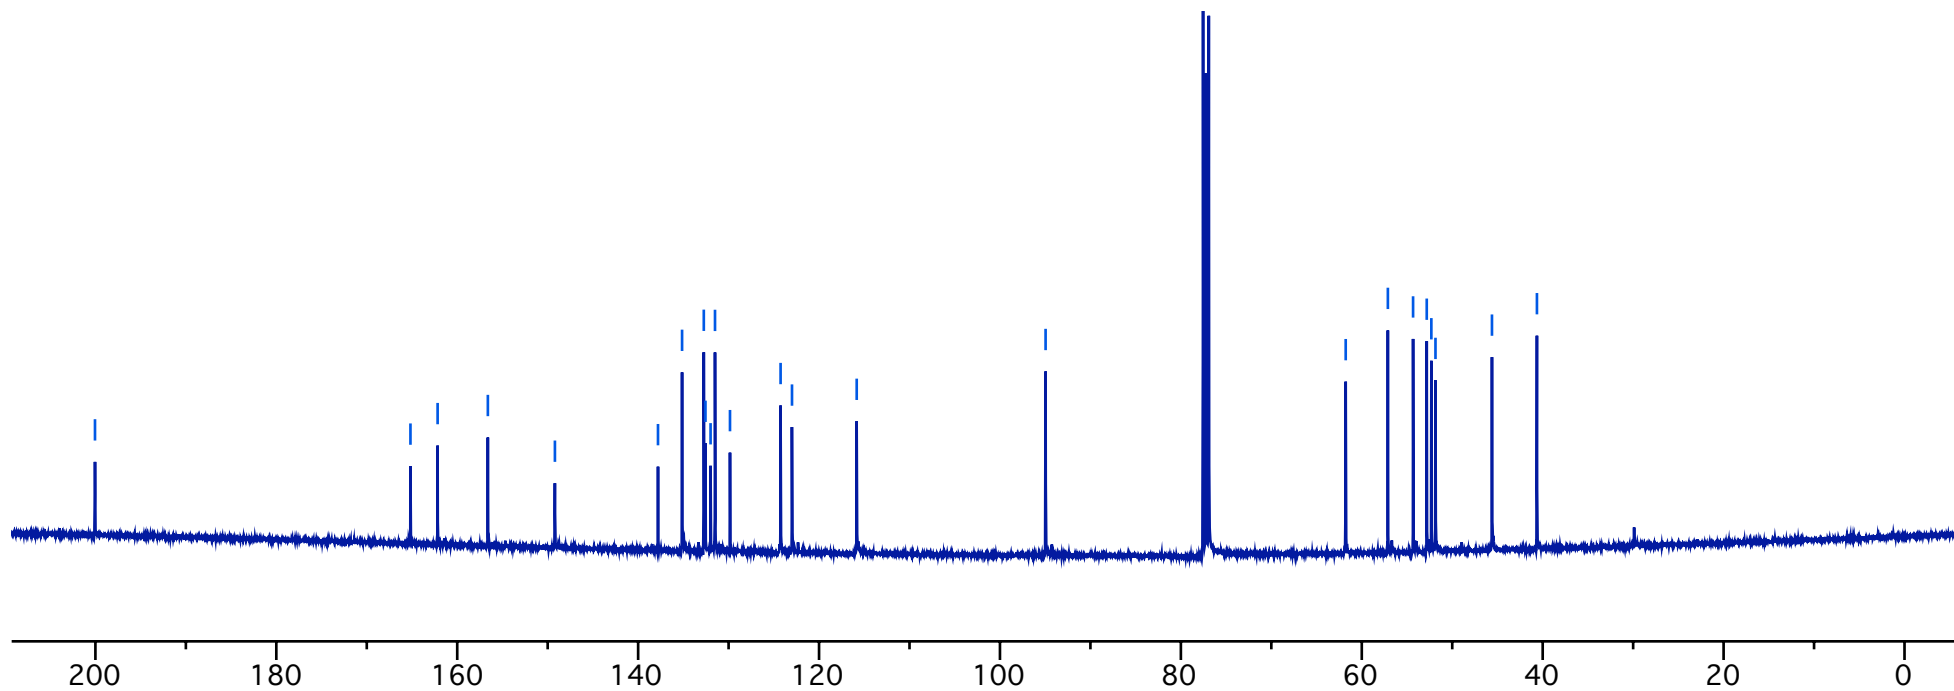

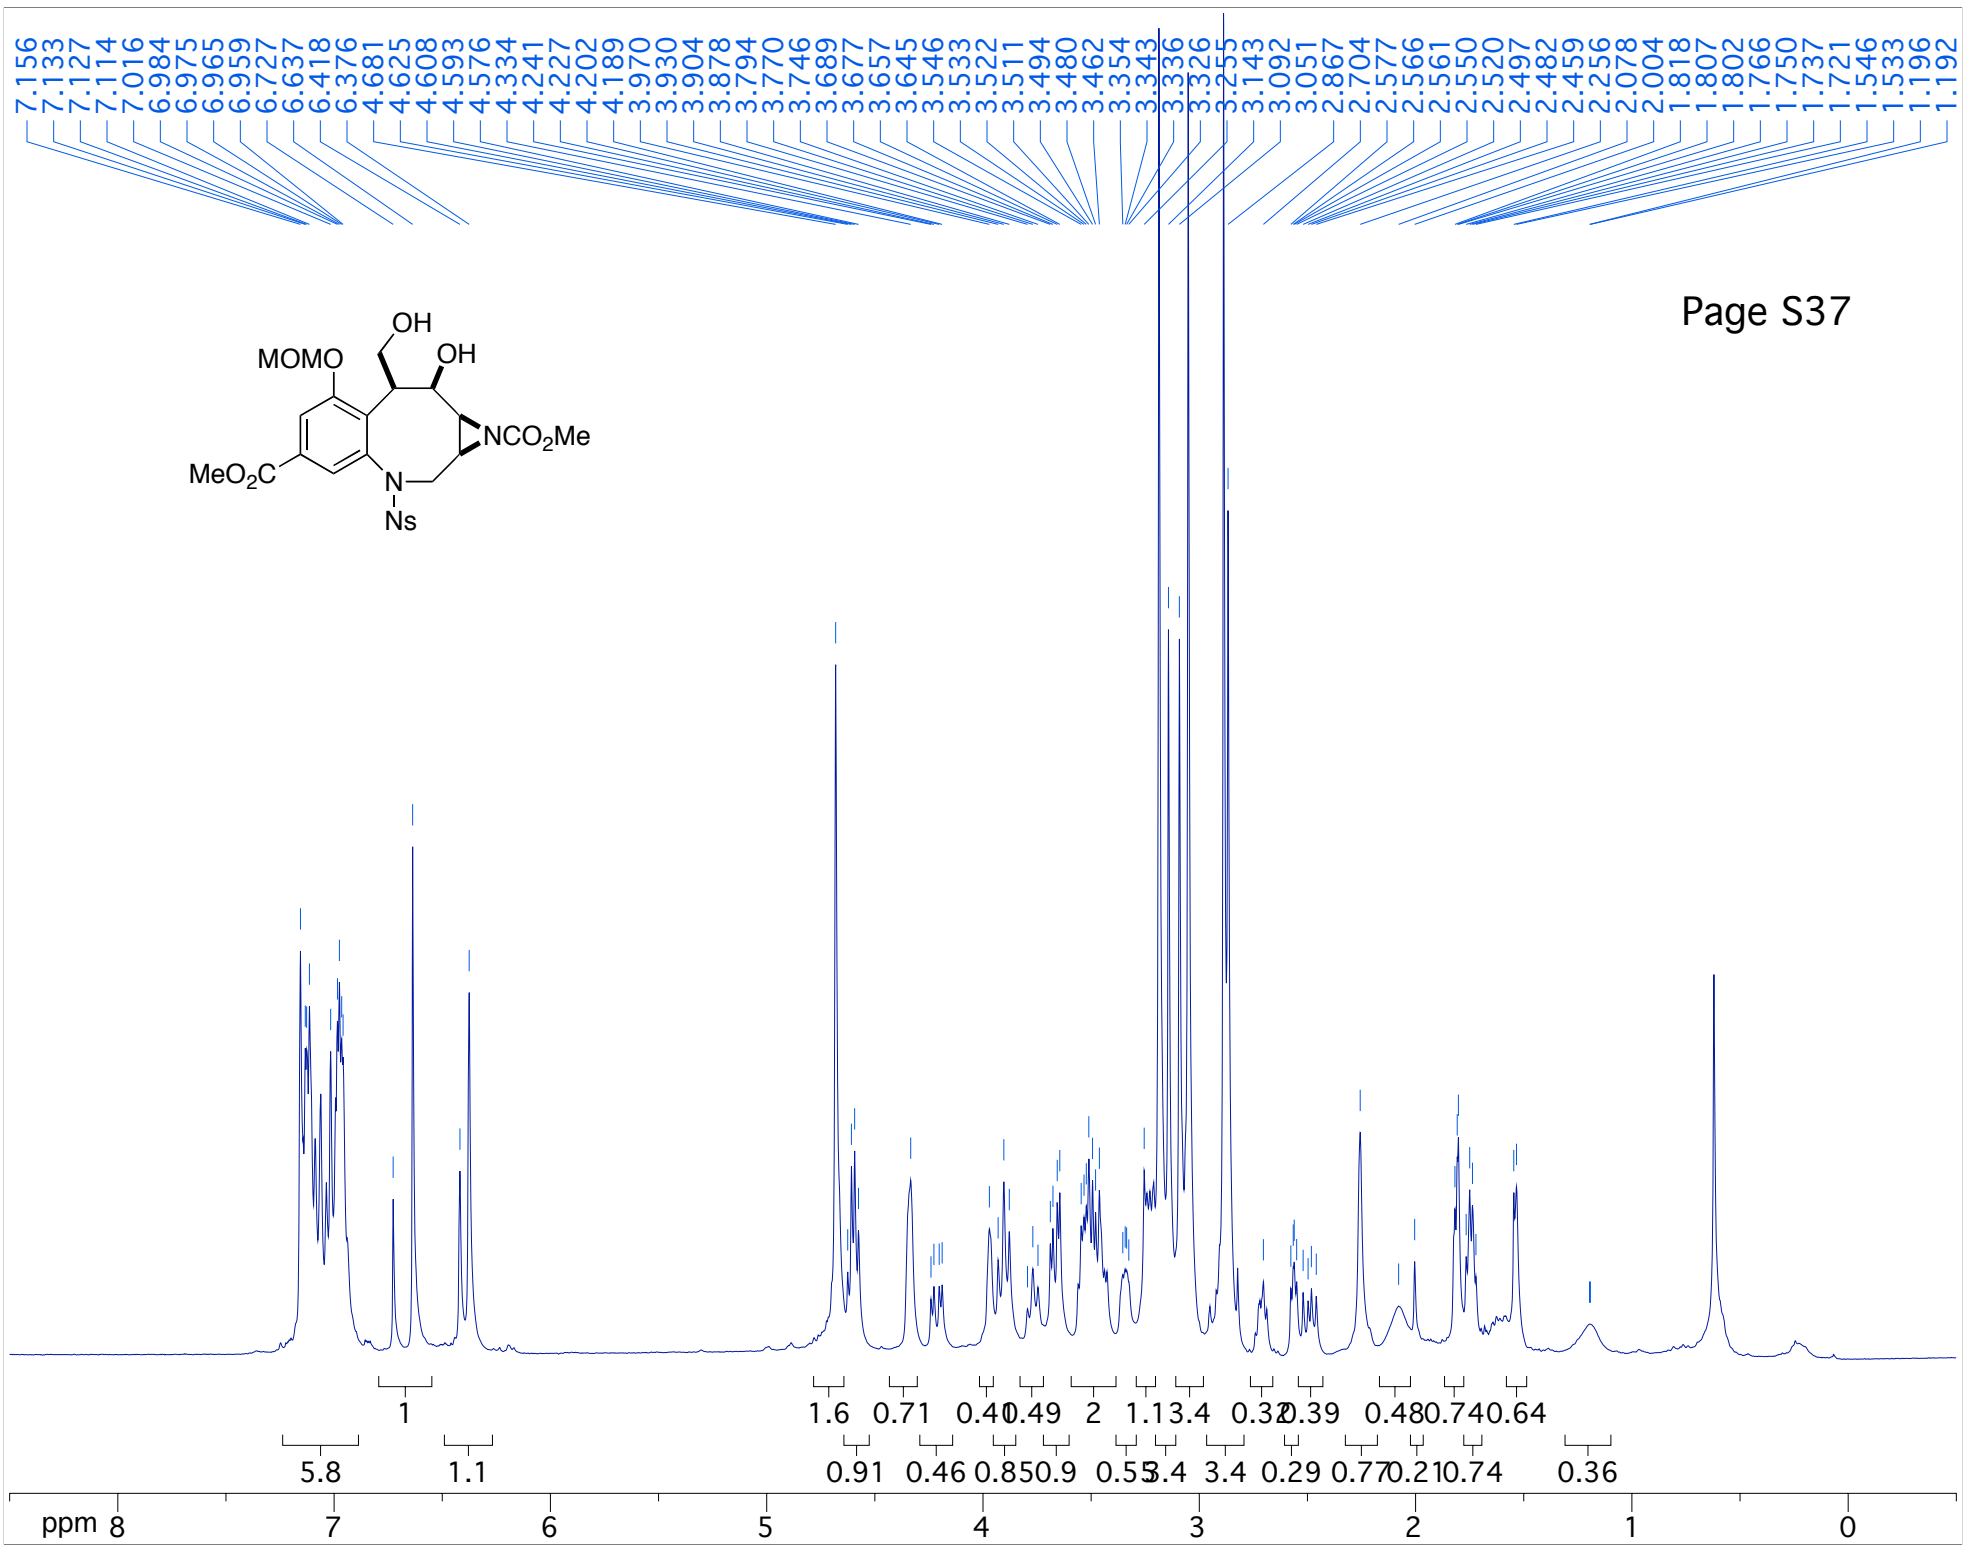

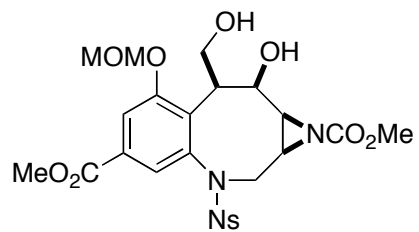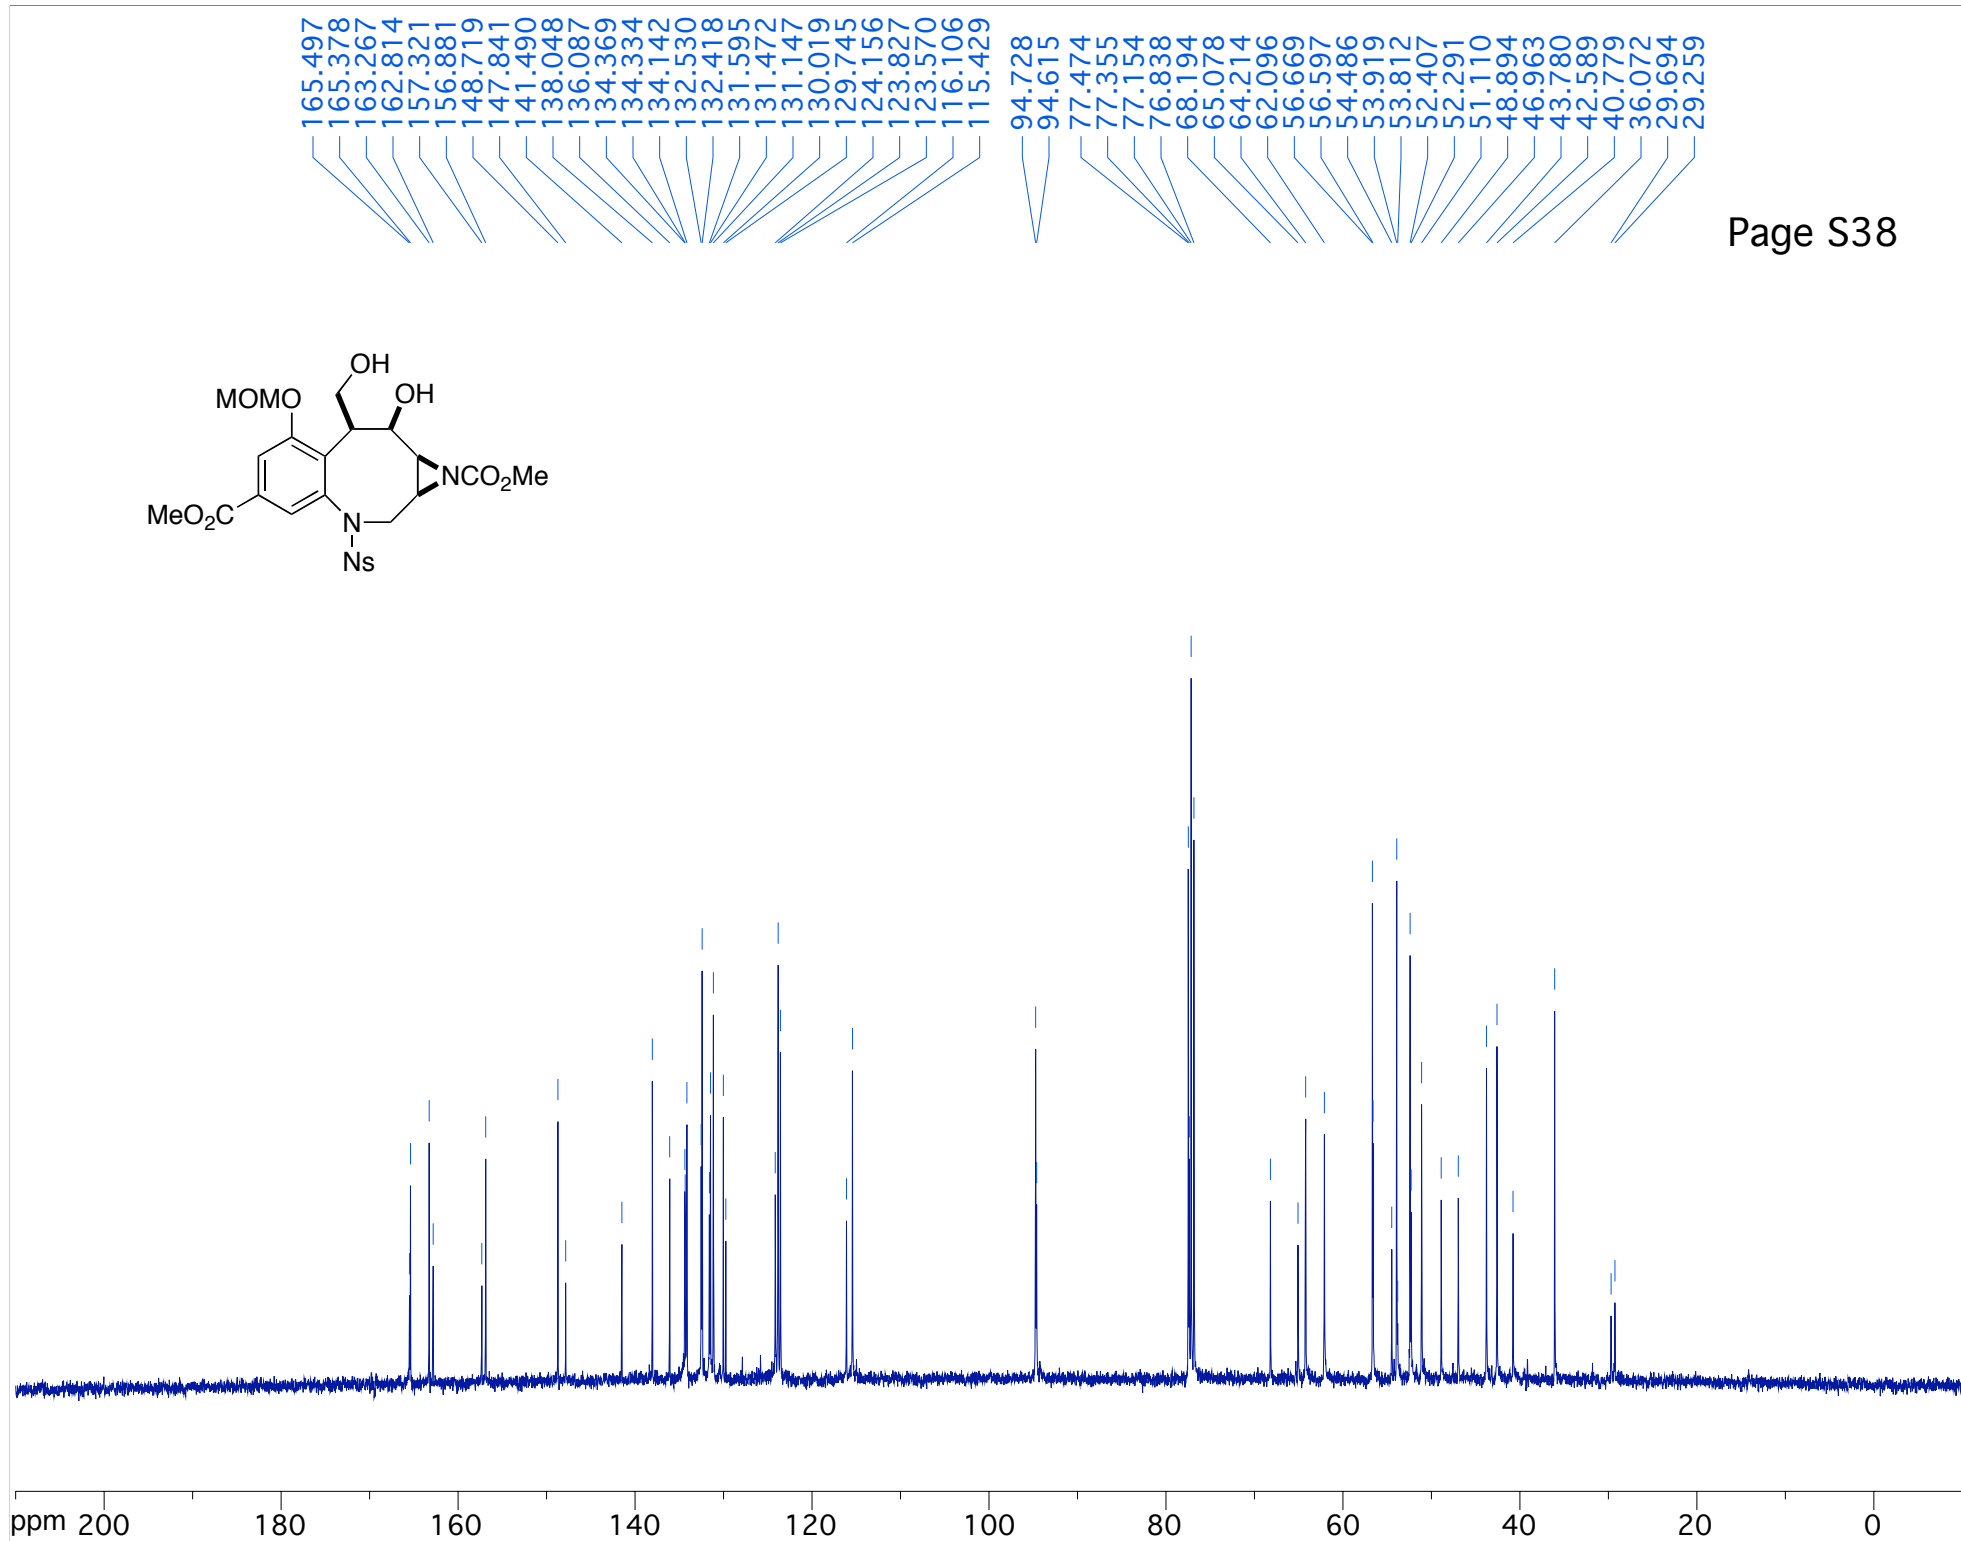

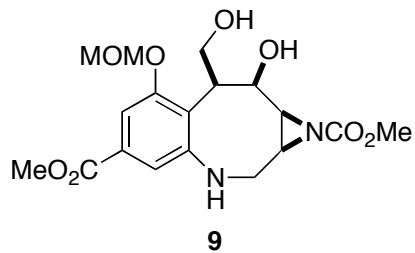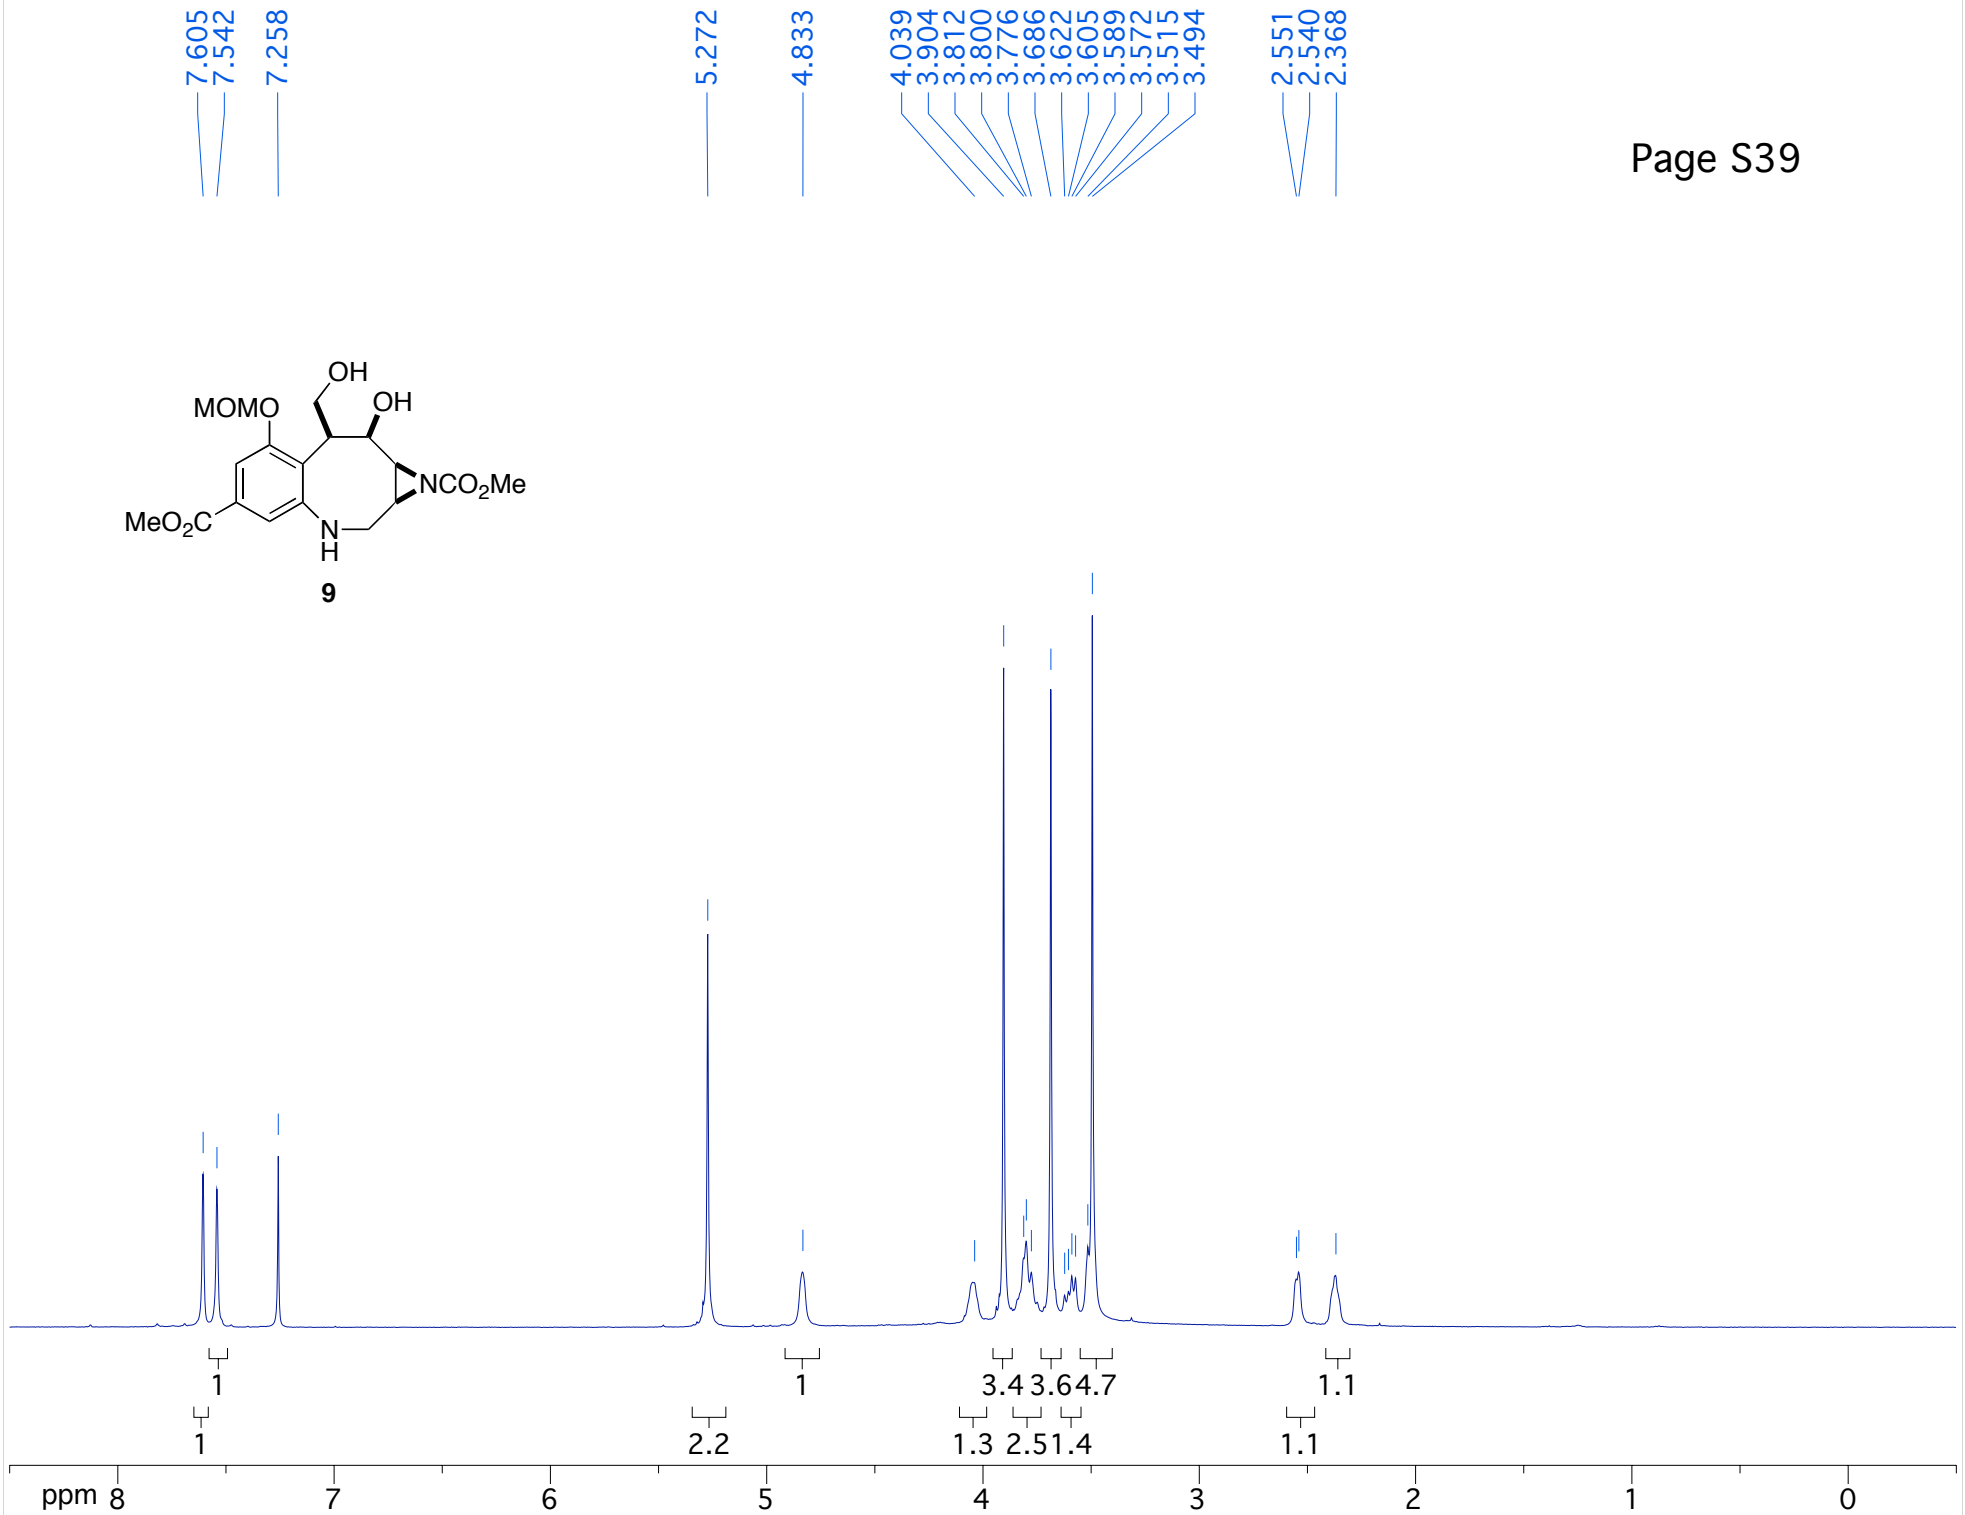

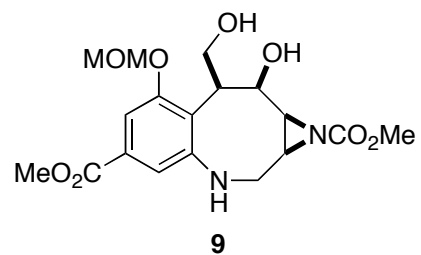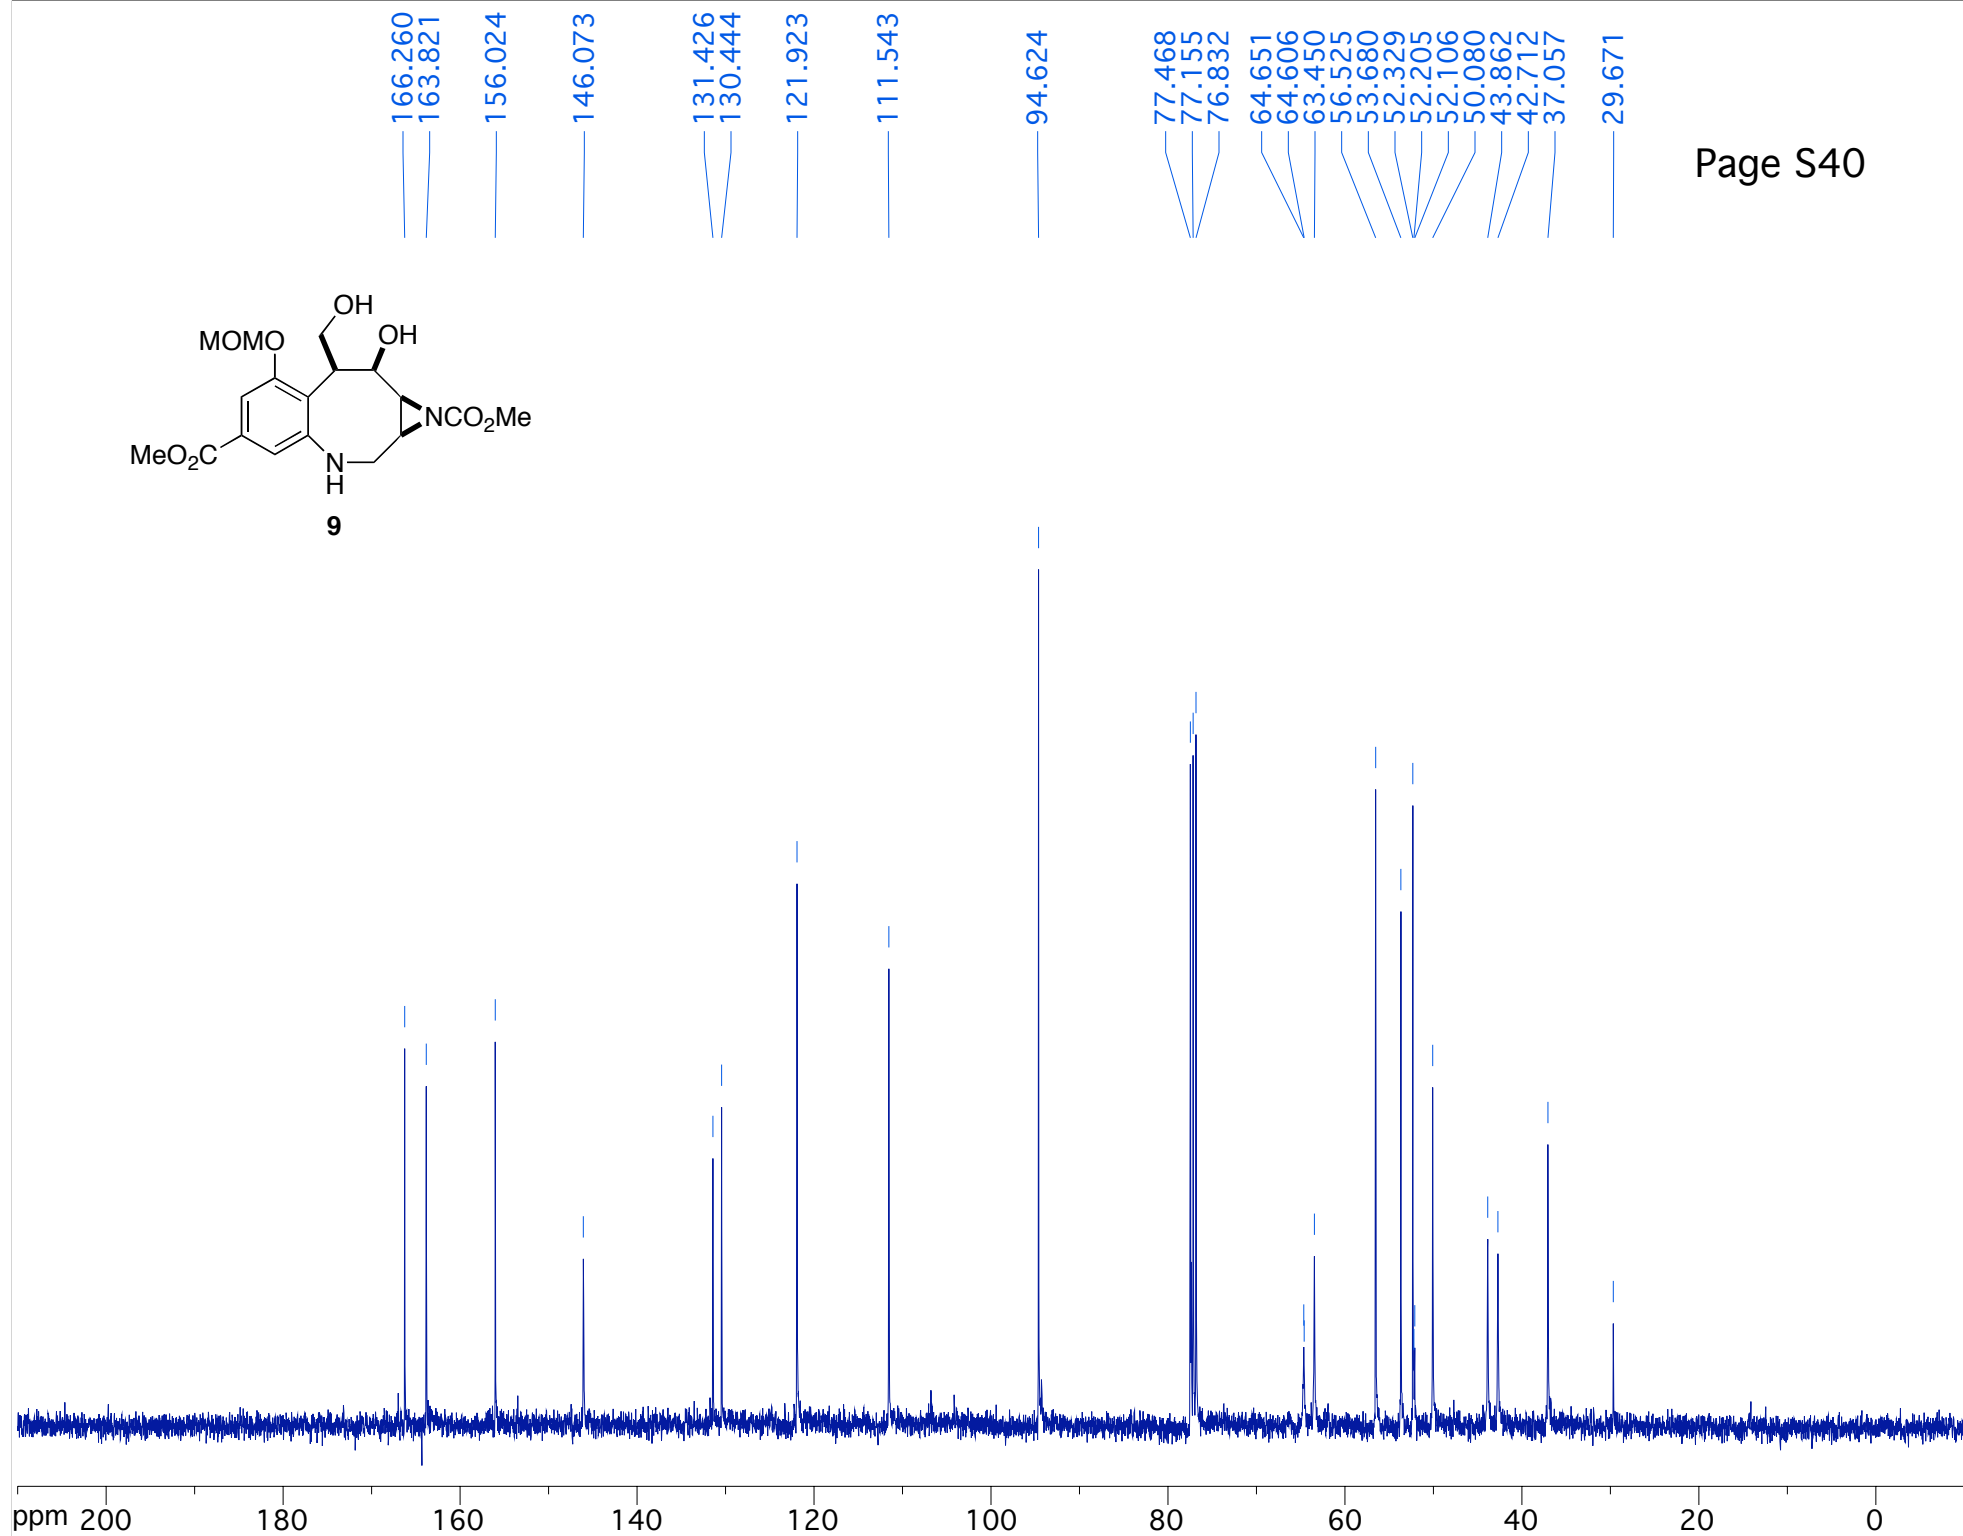



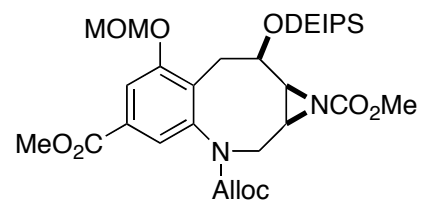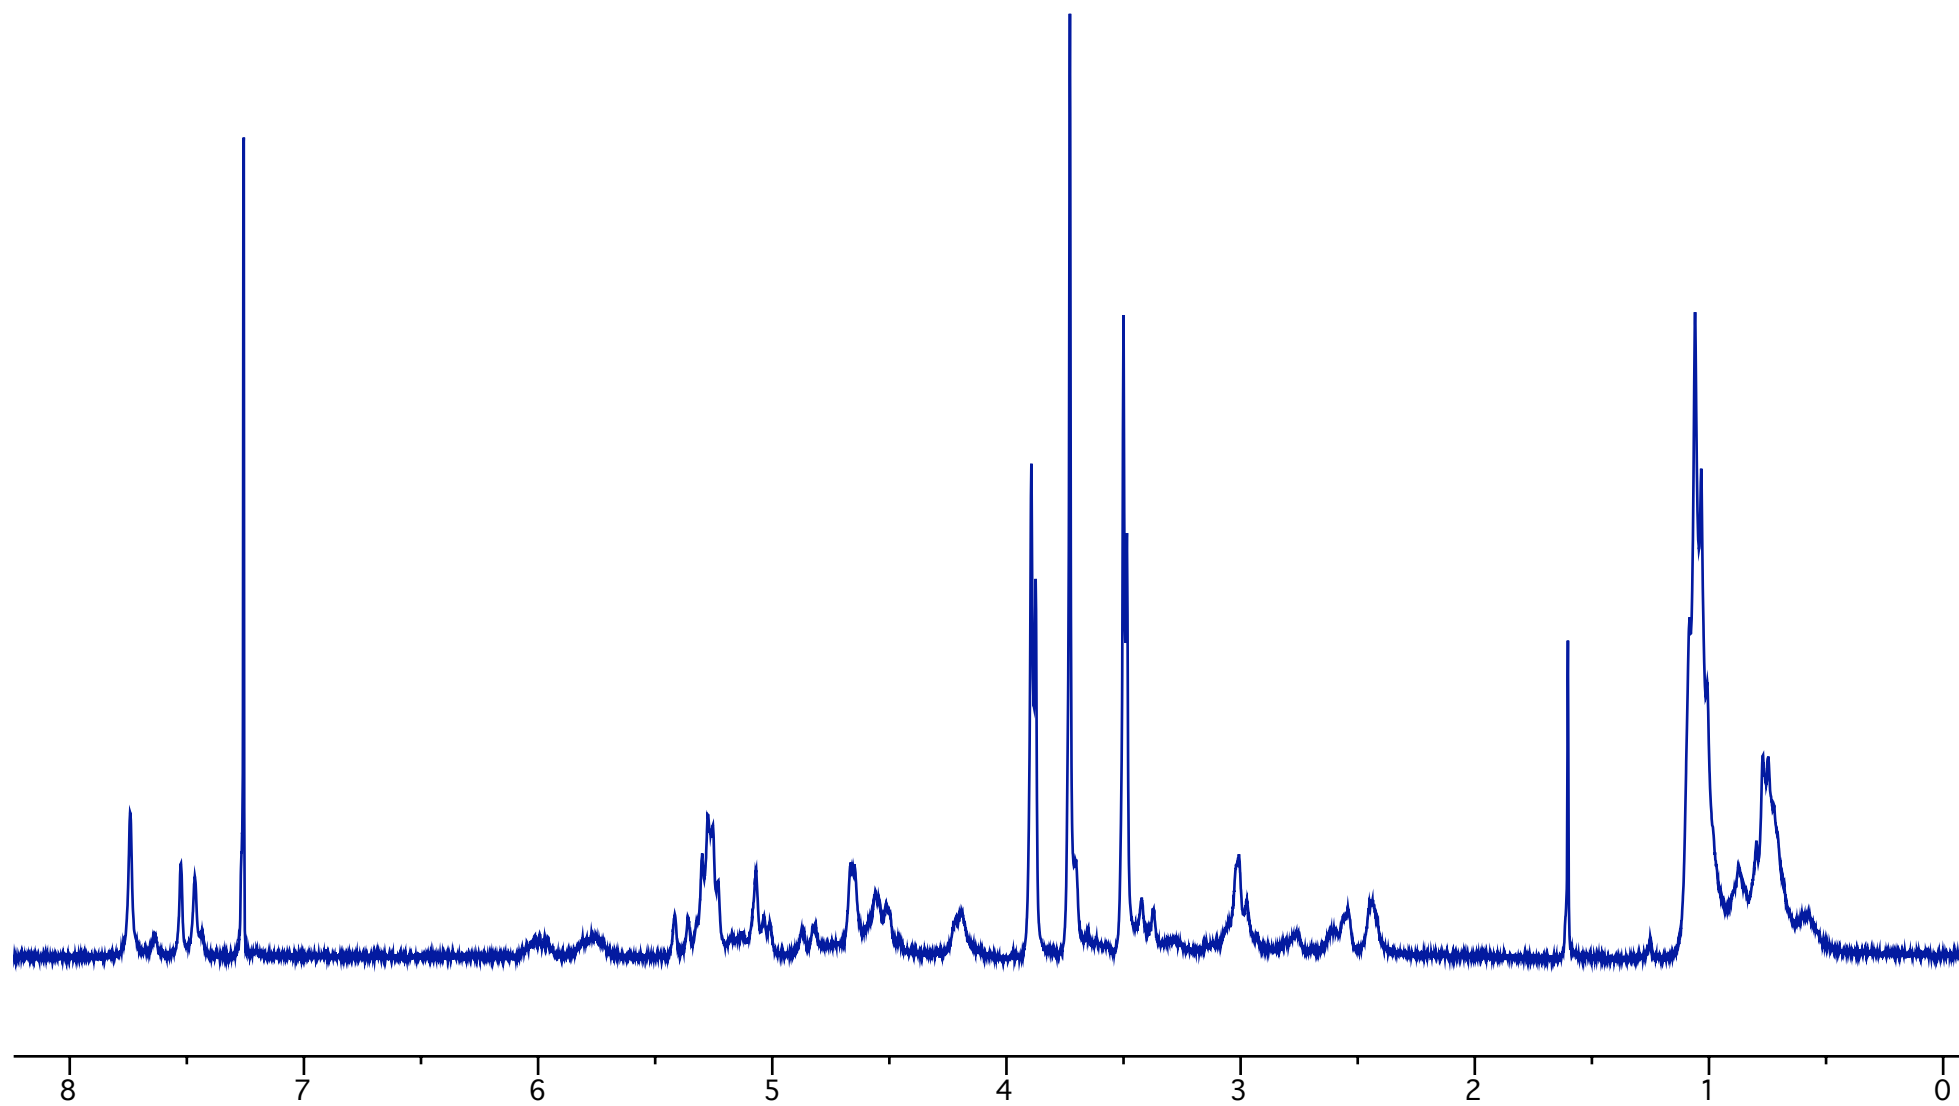

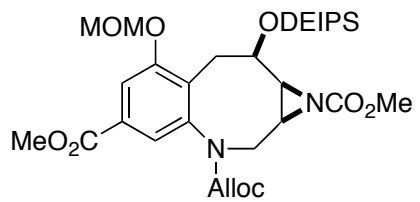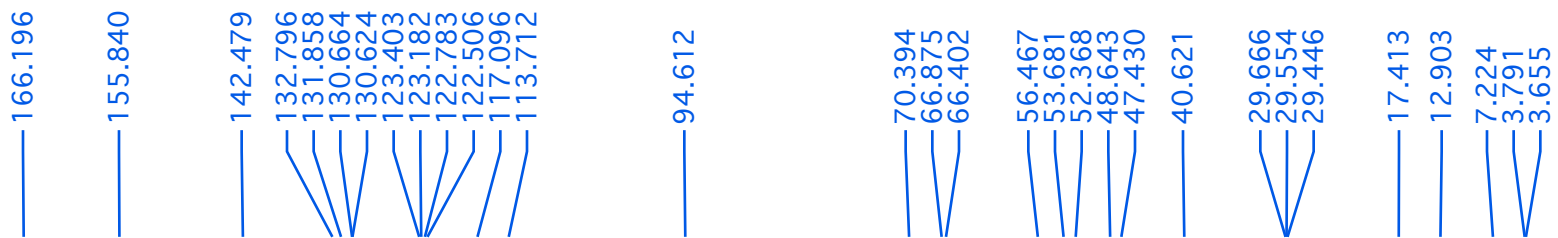

Page S42

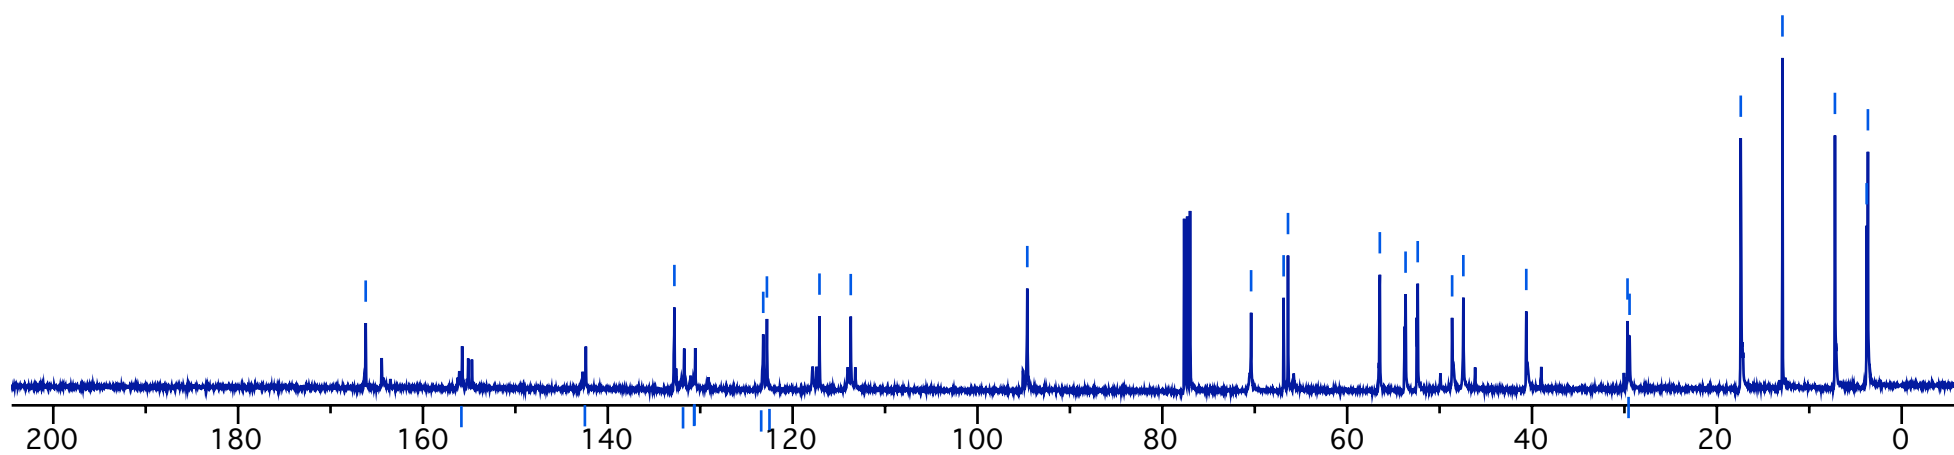

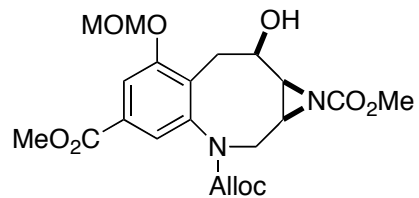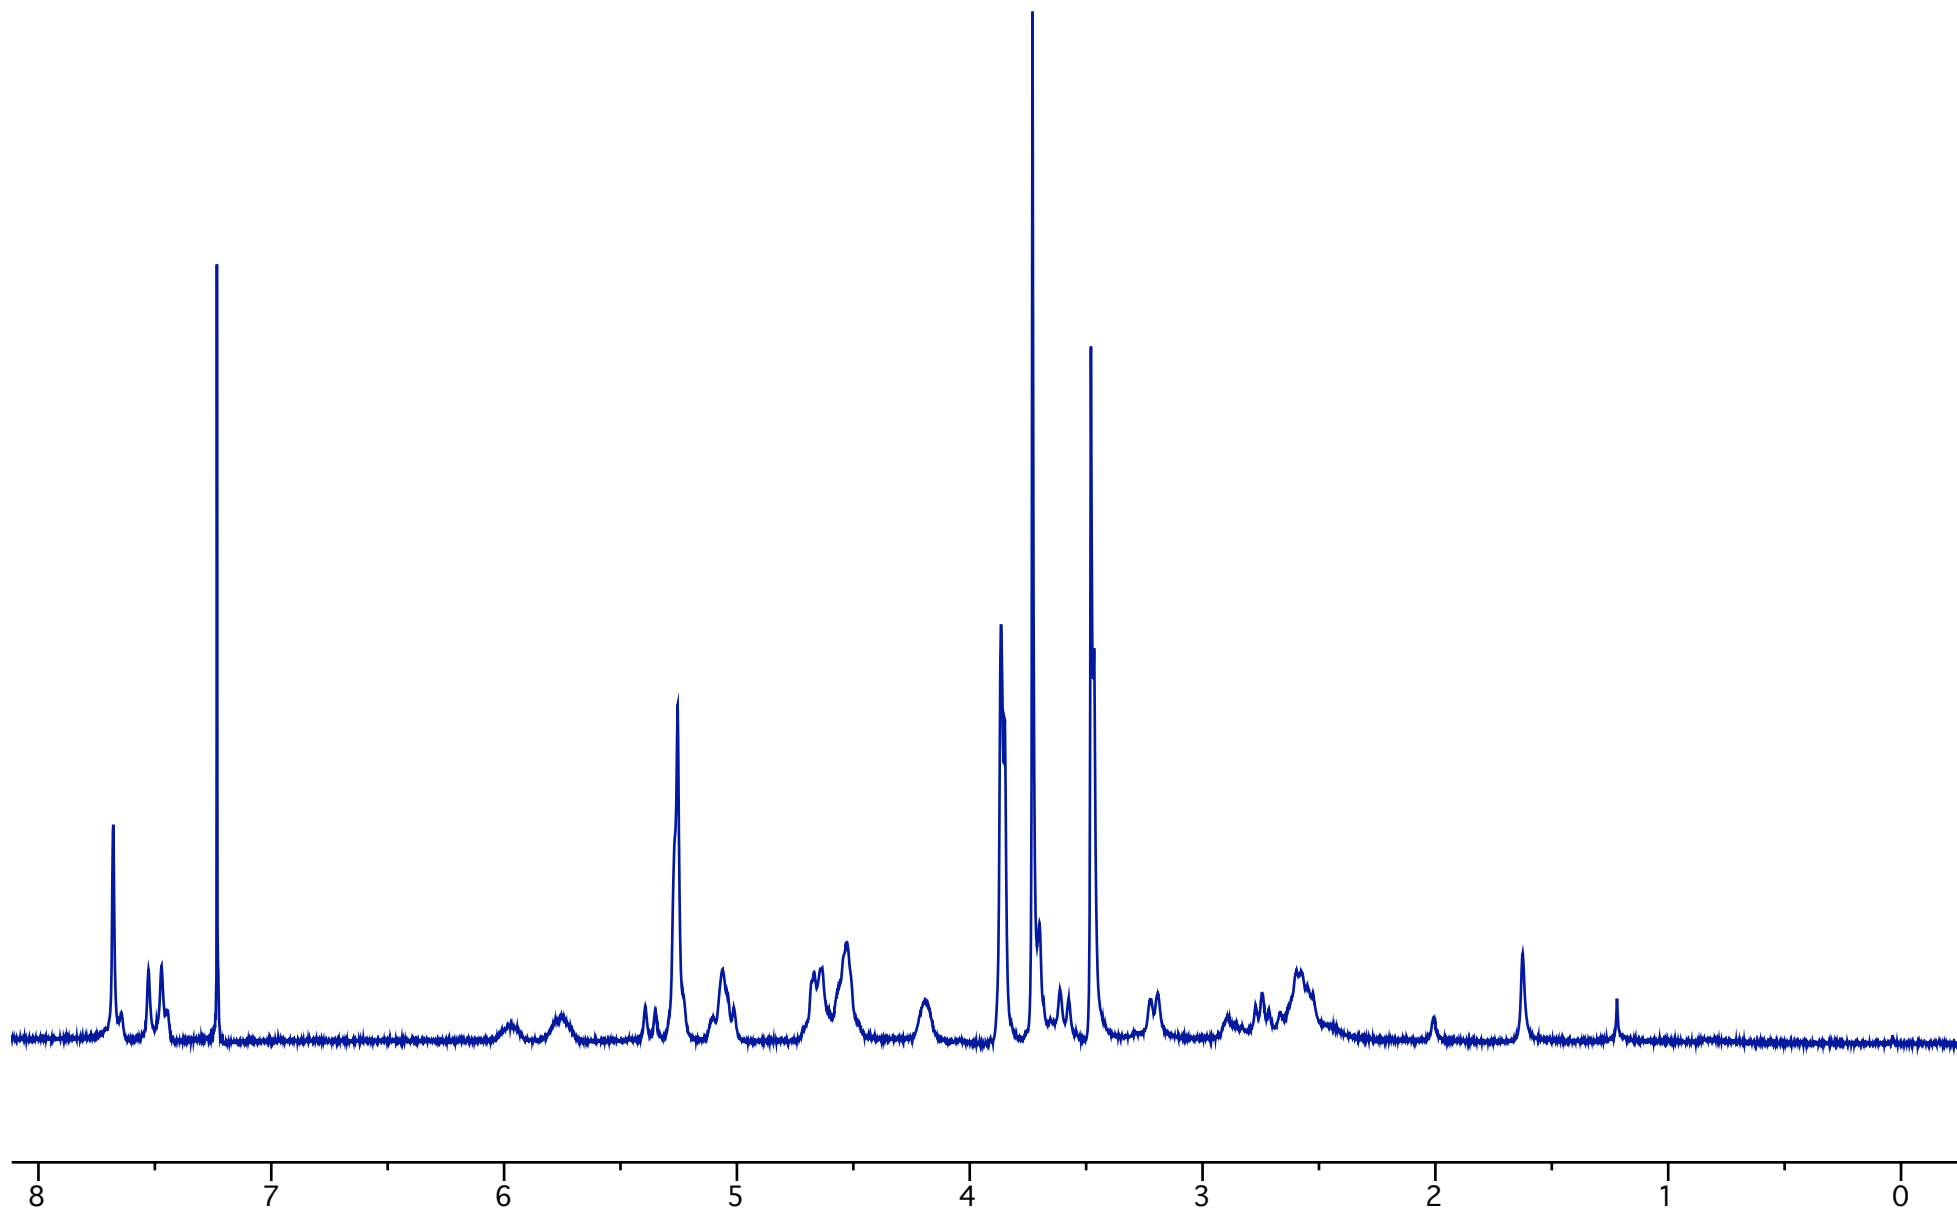

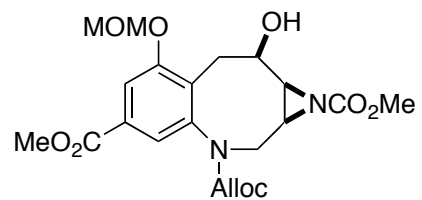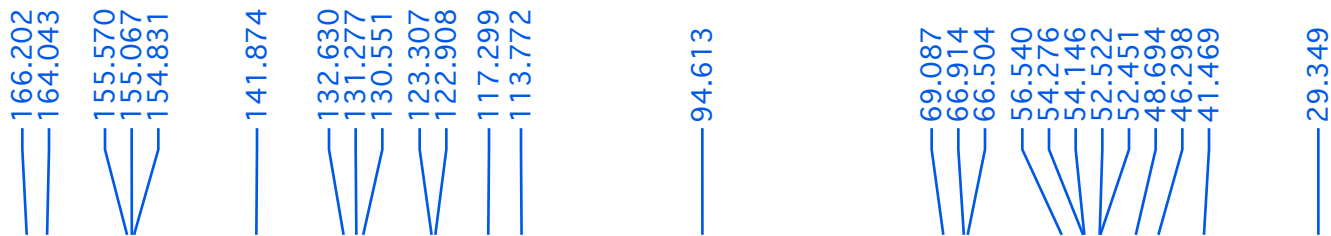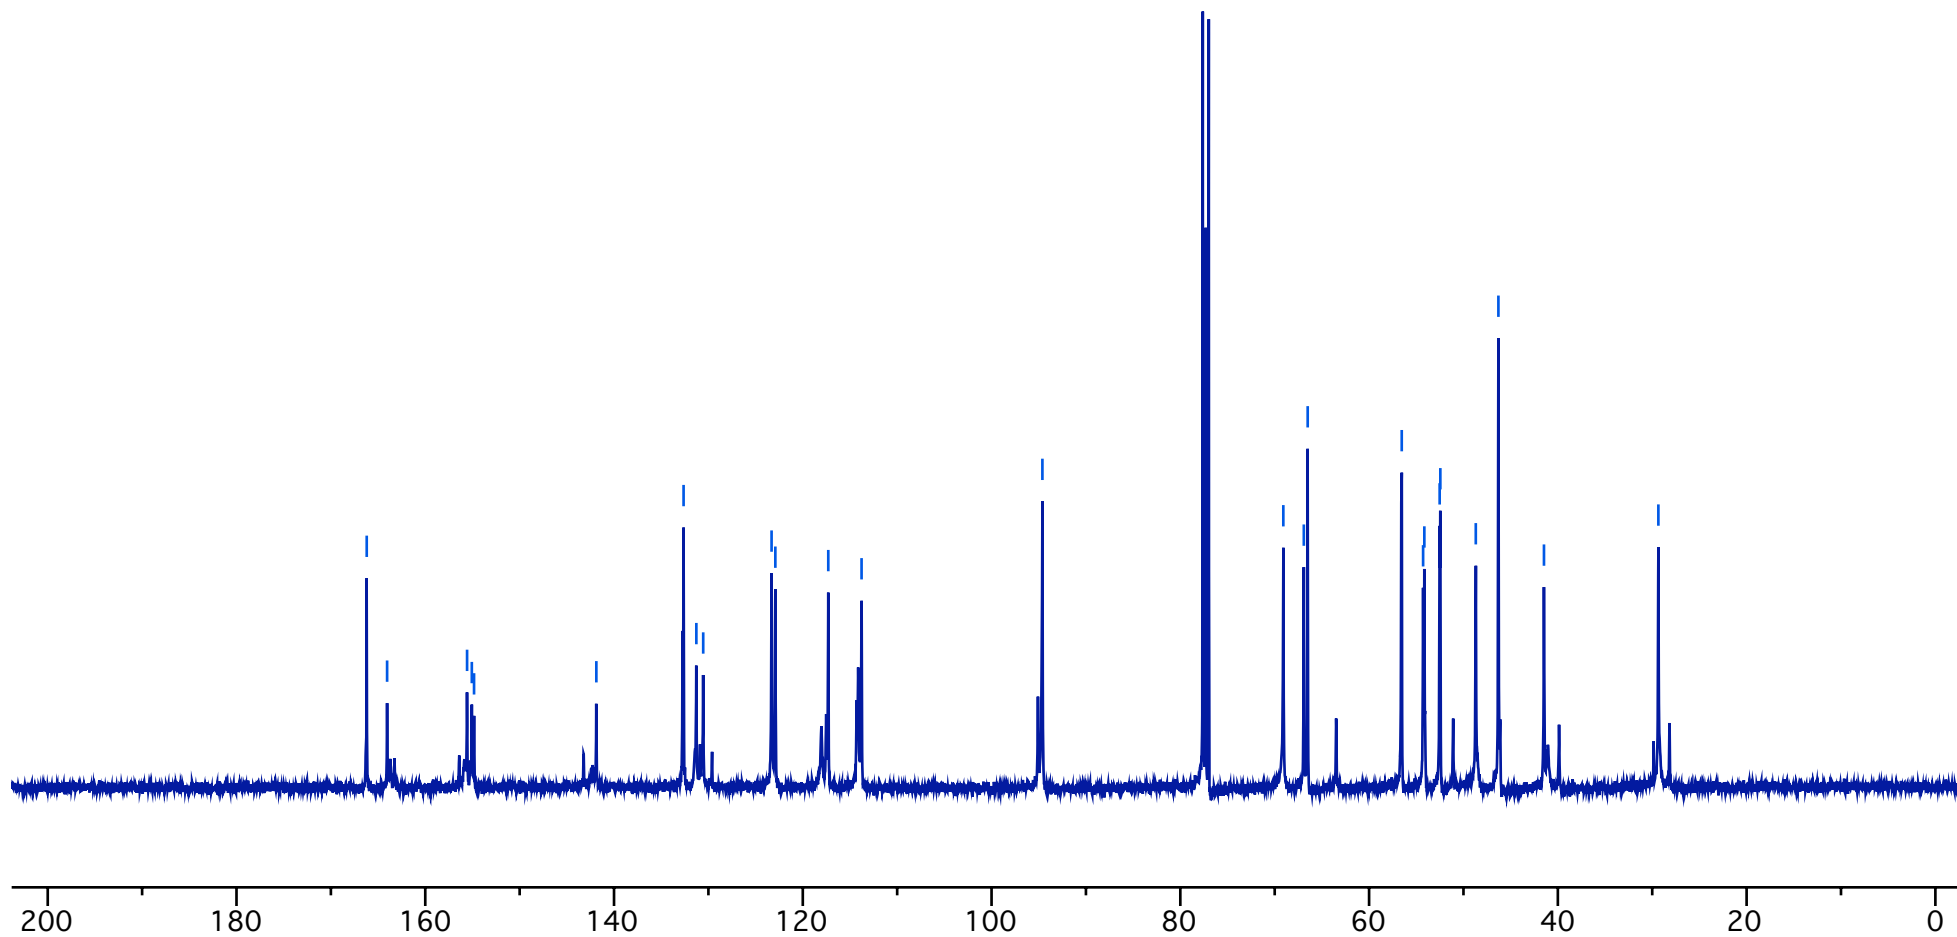

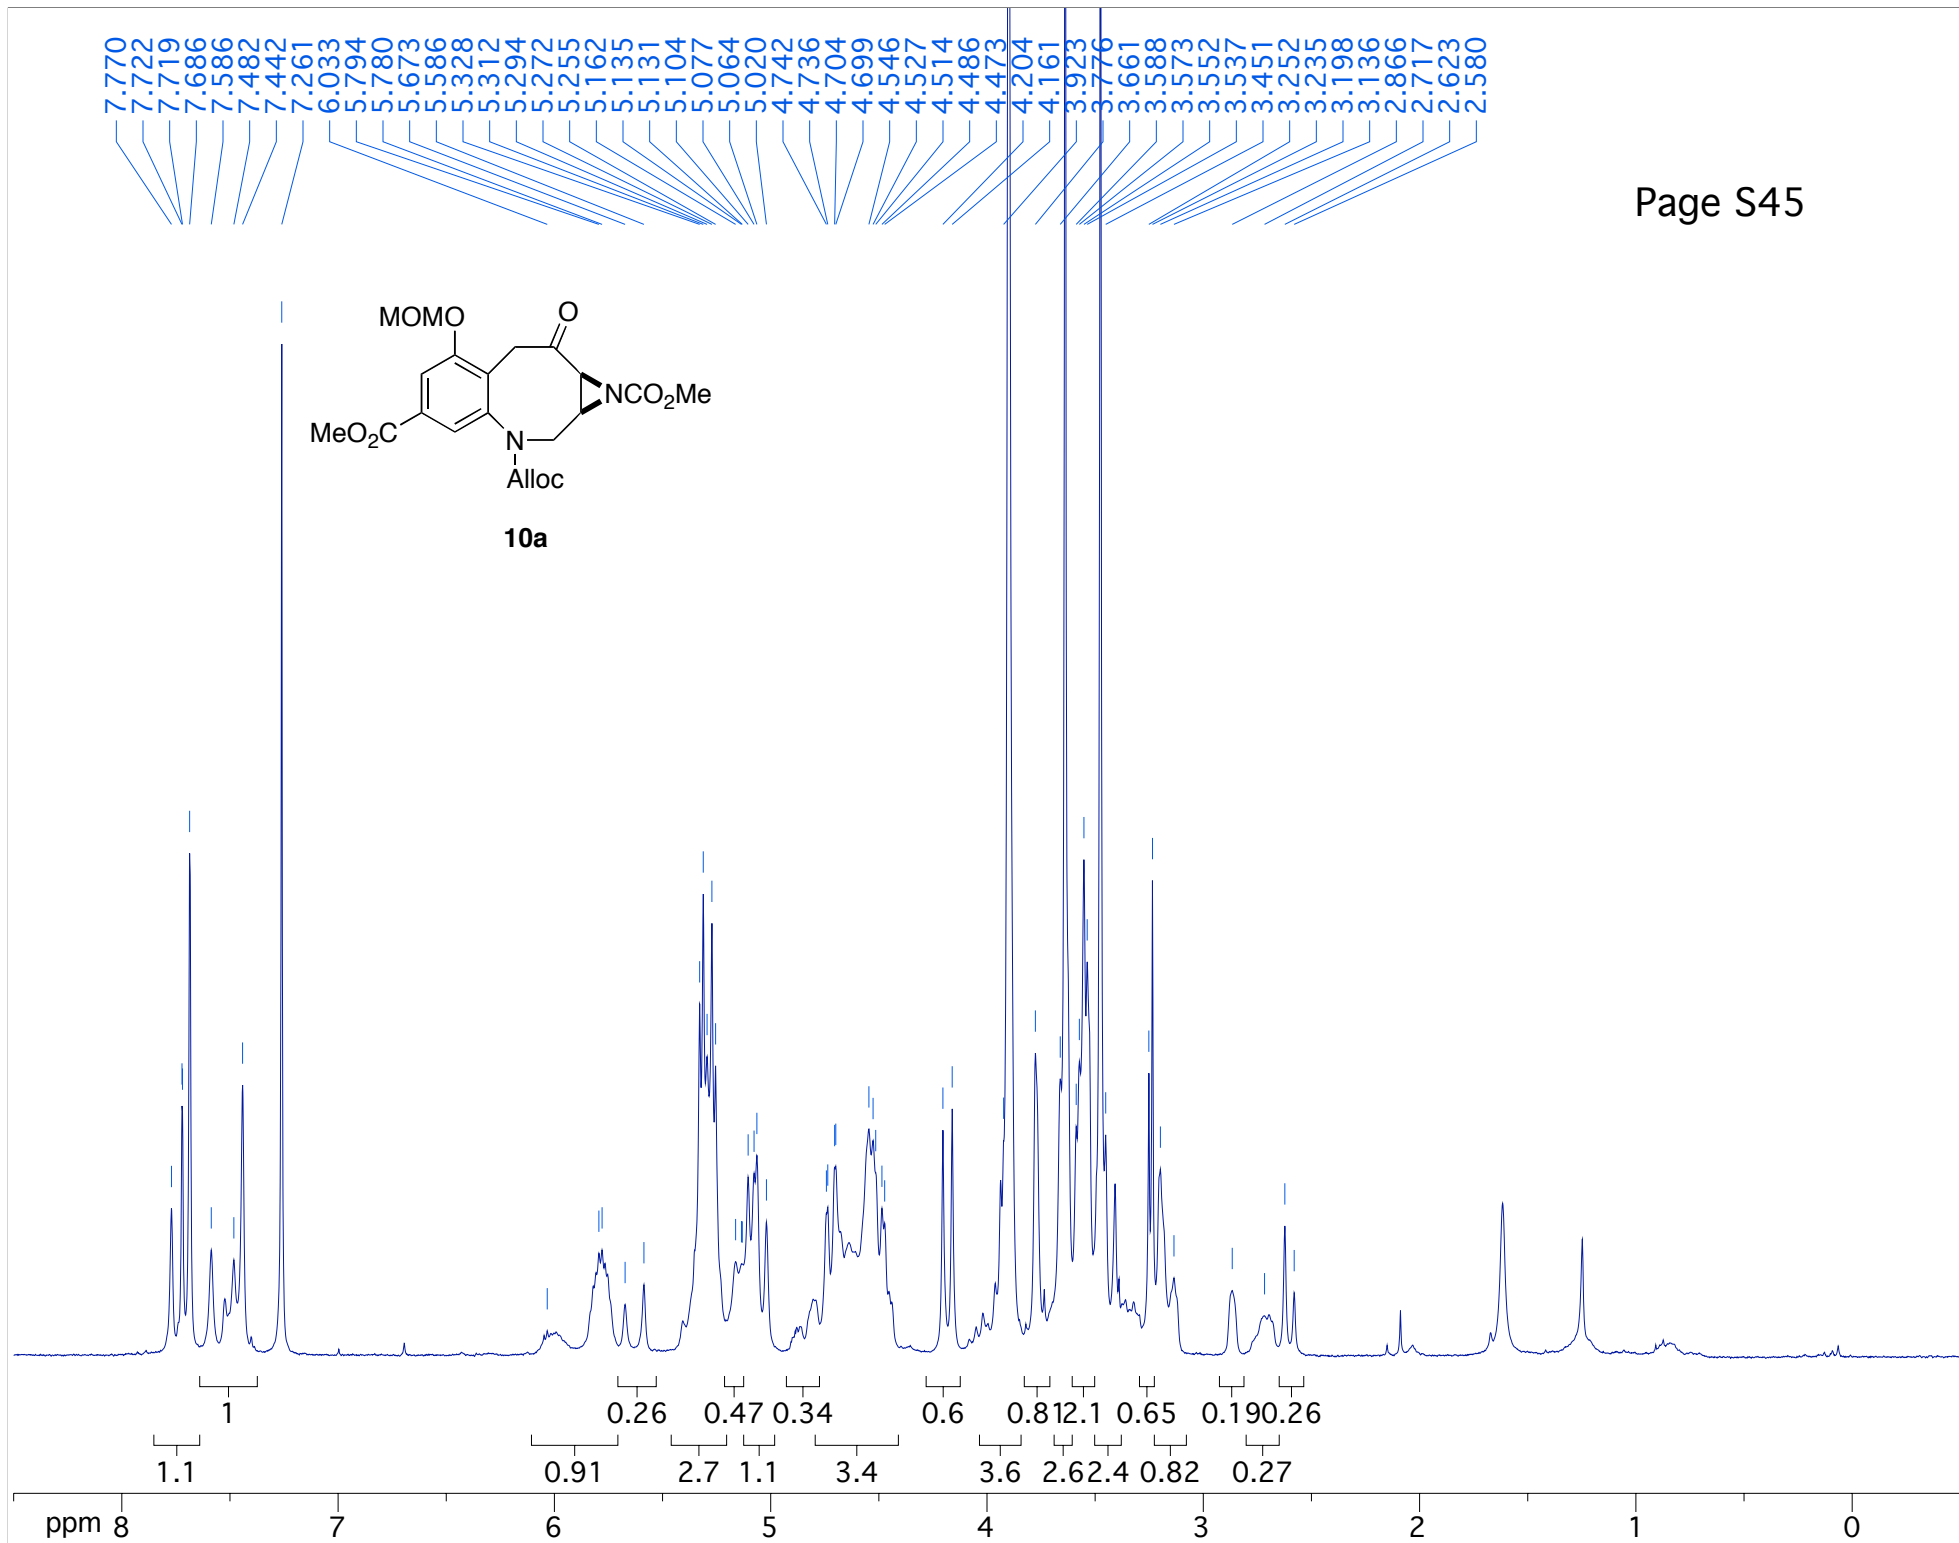

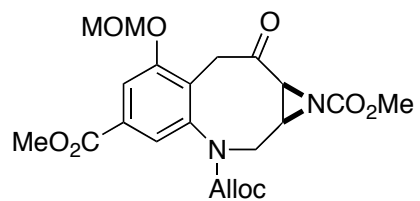**10a**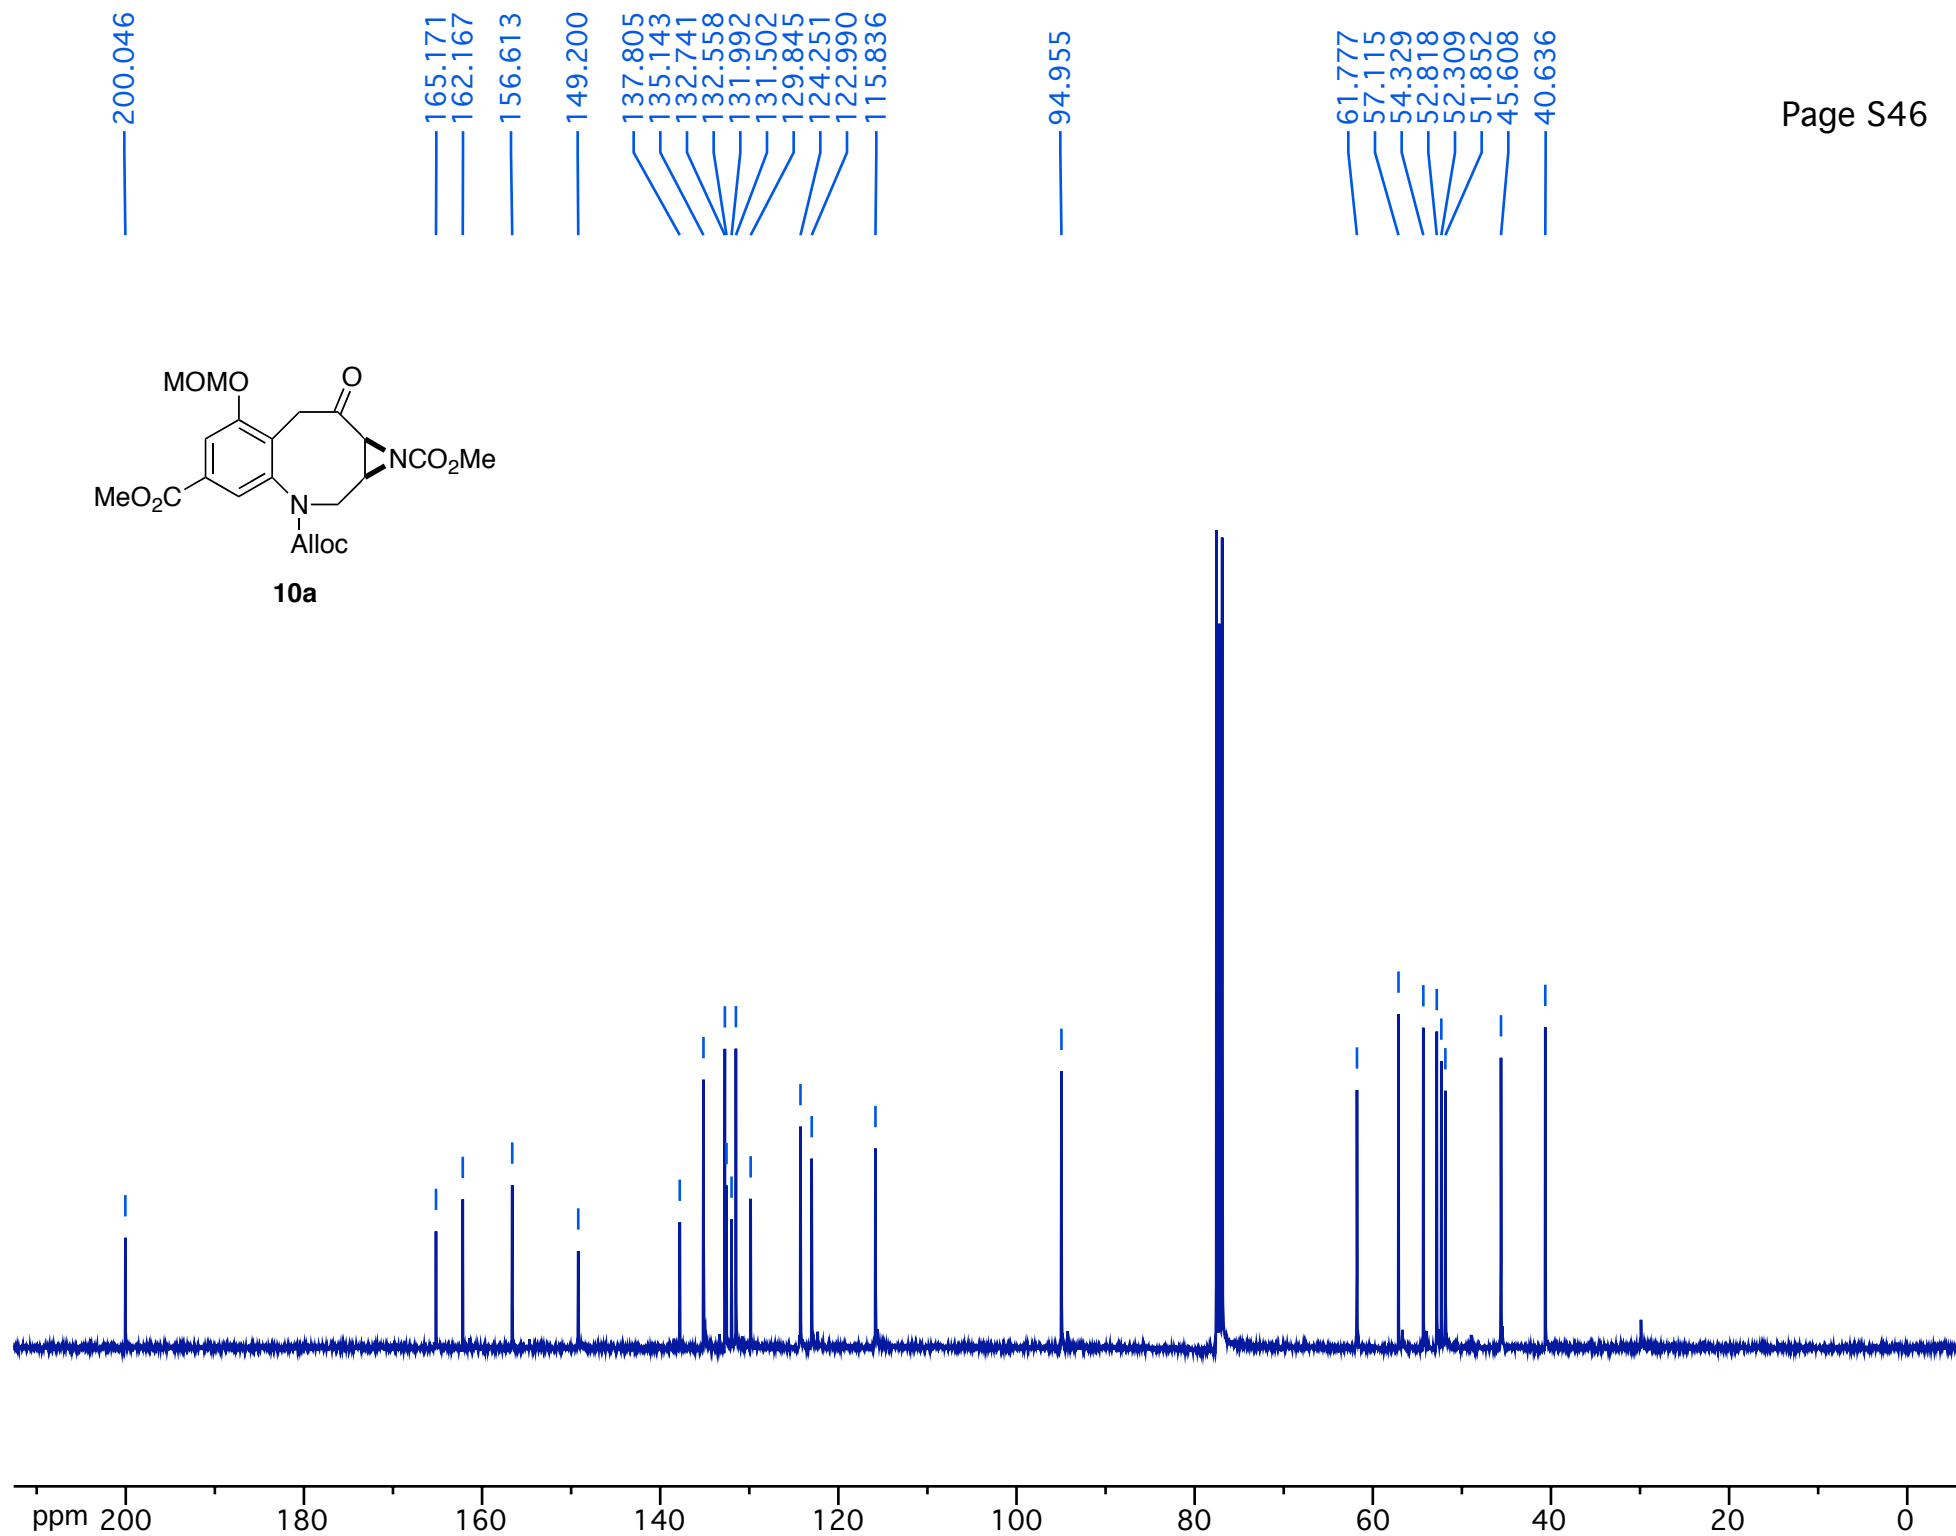

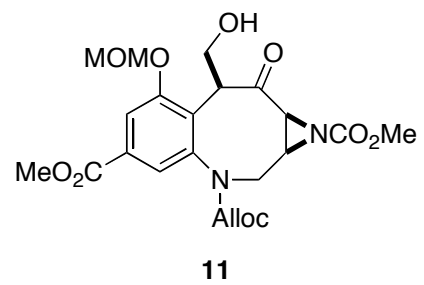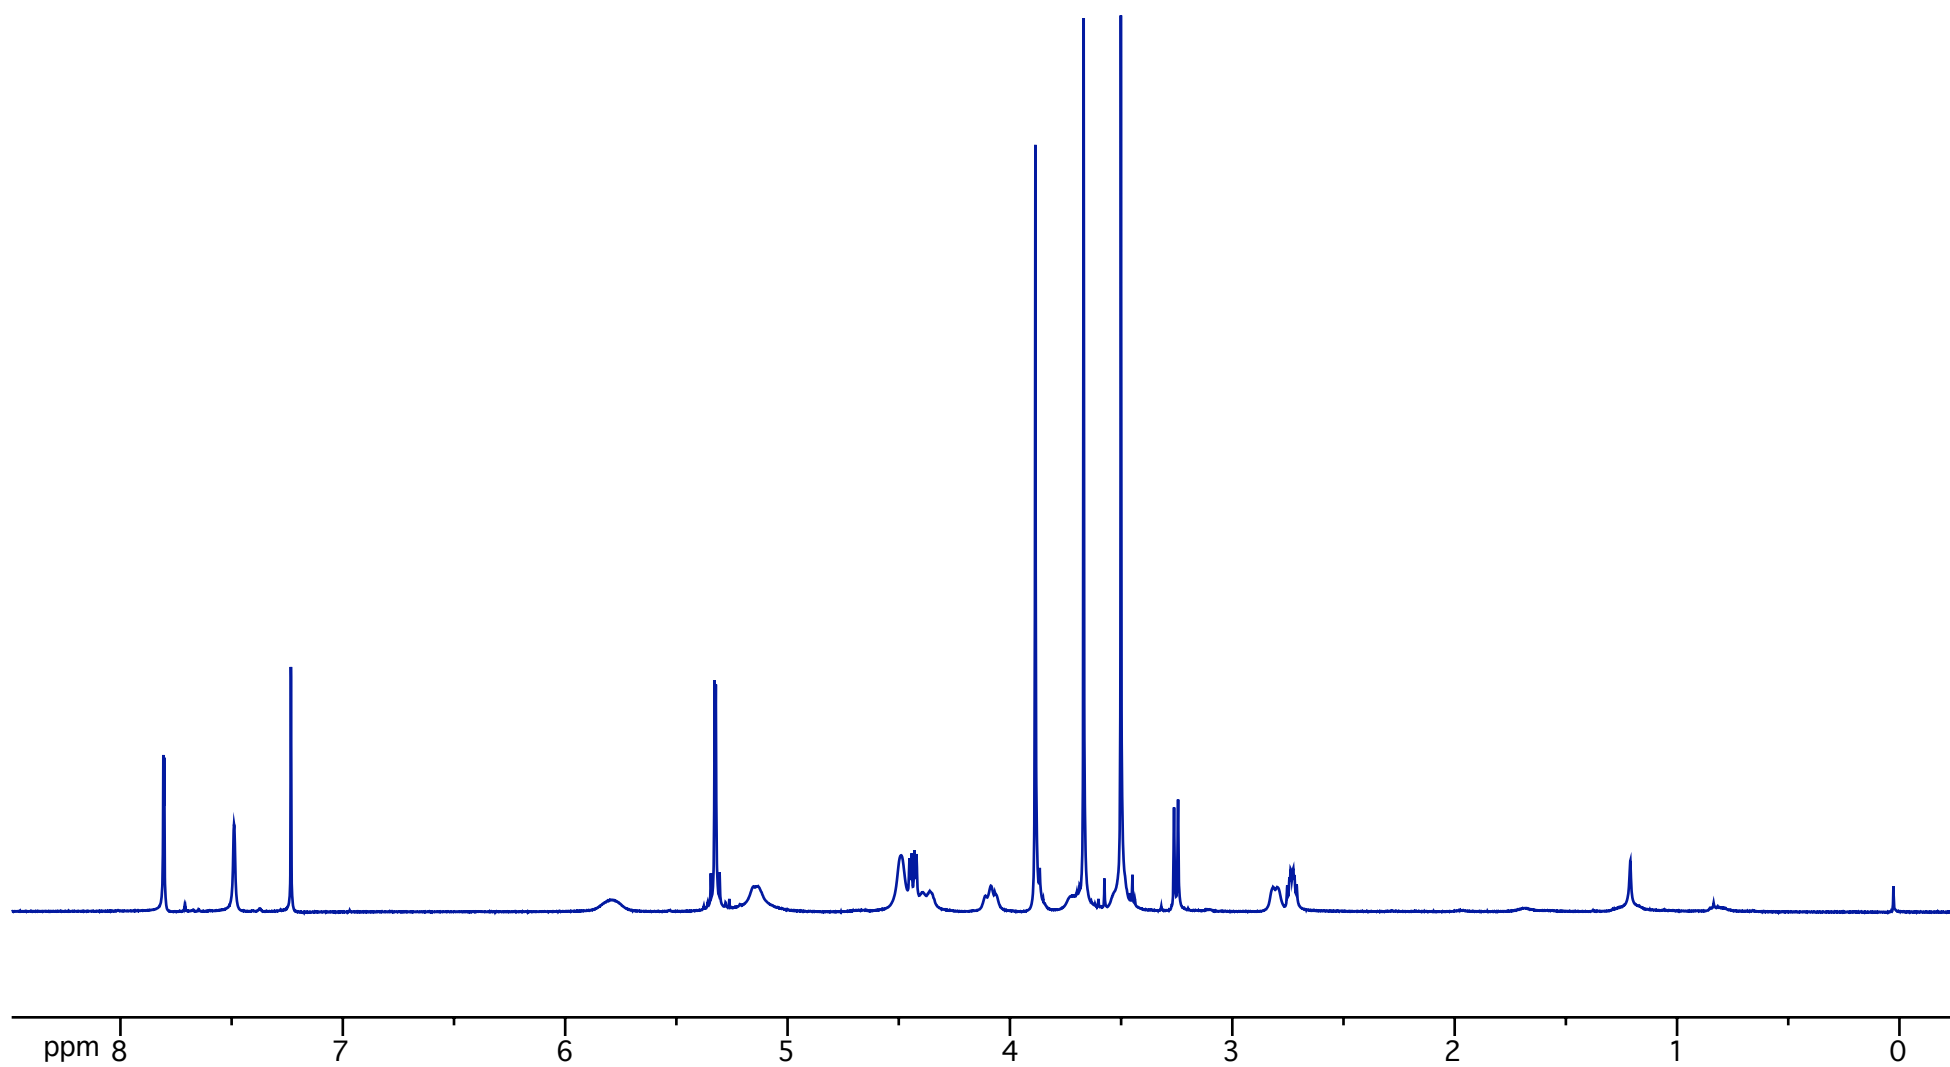

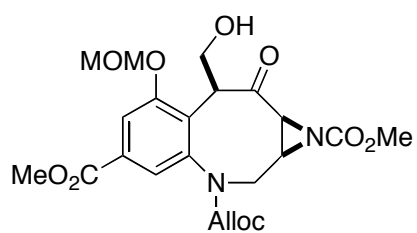

11

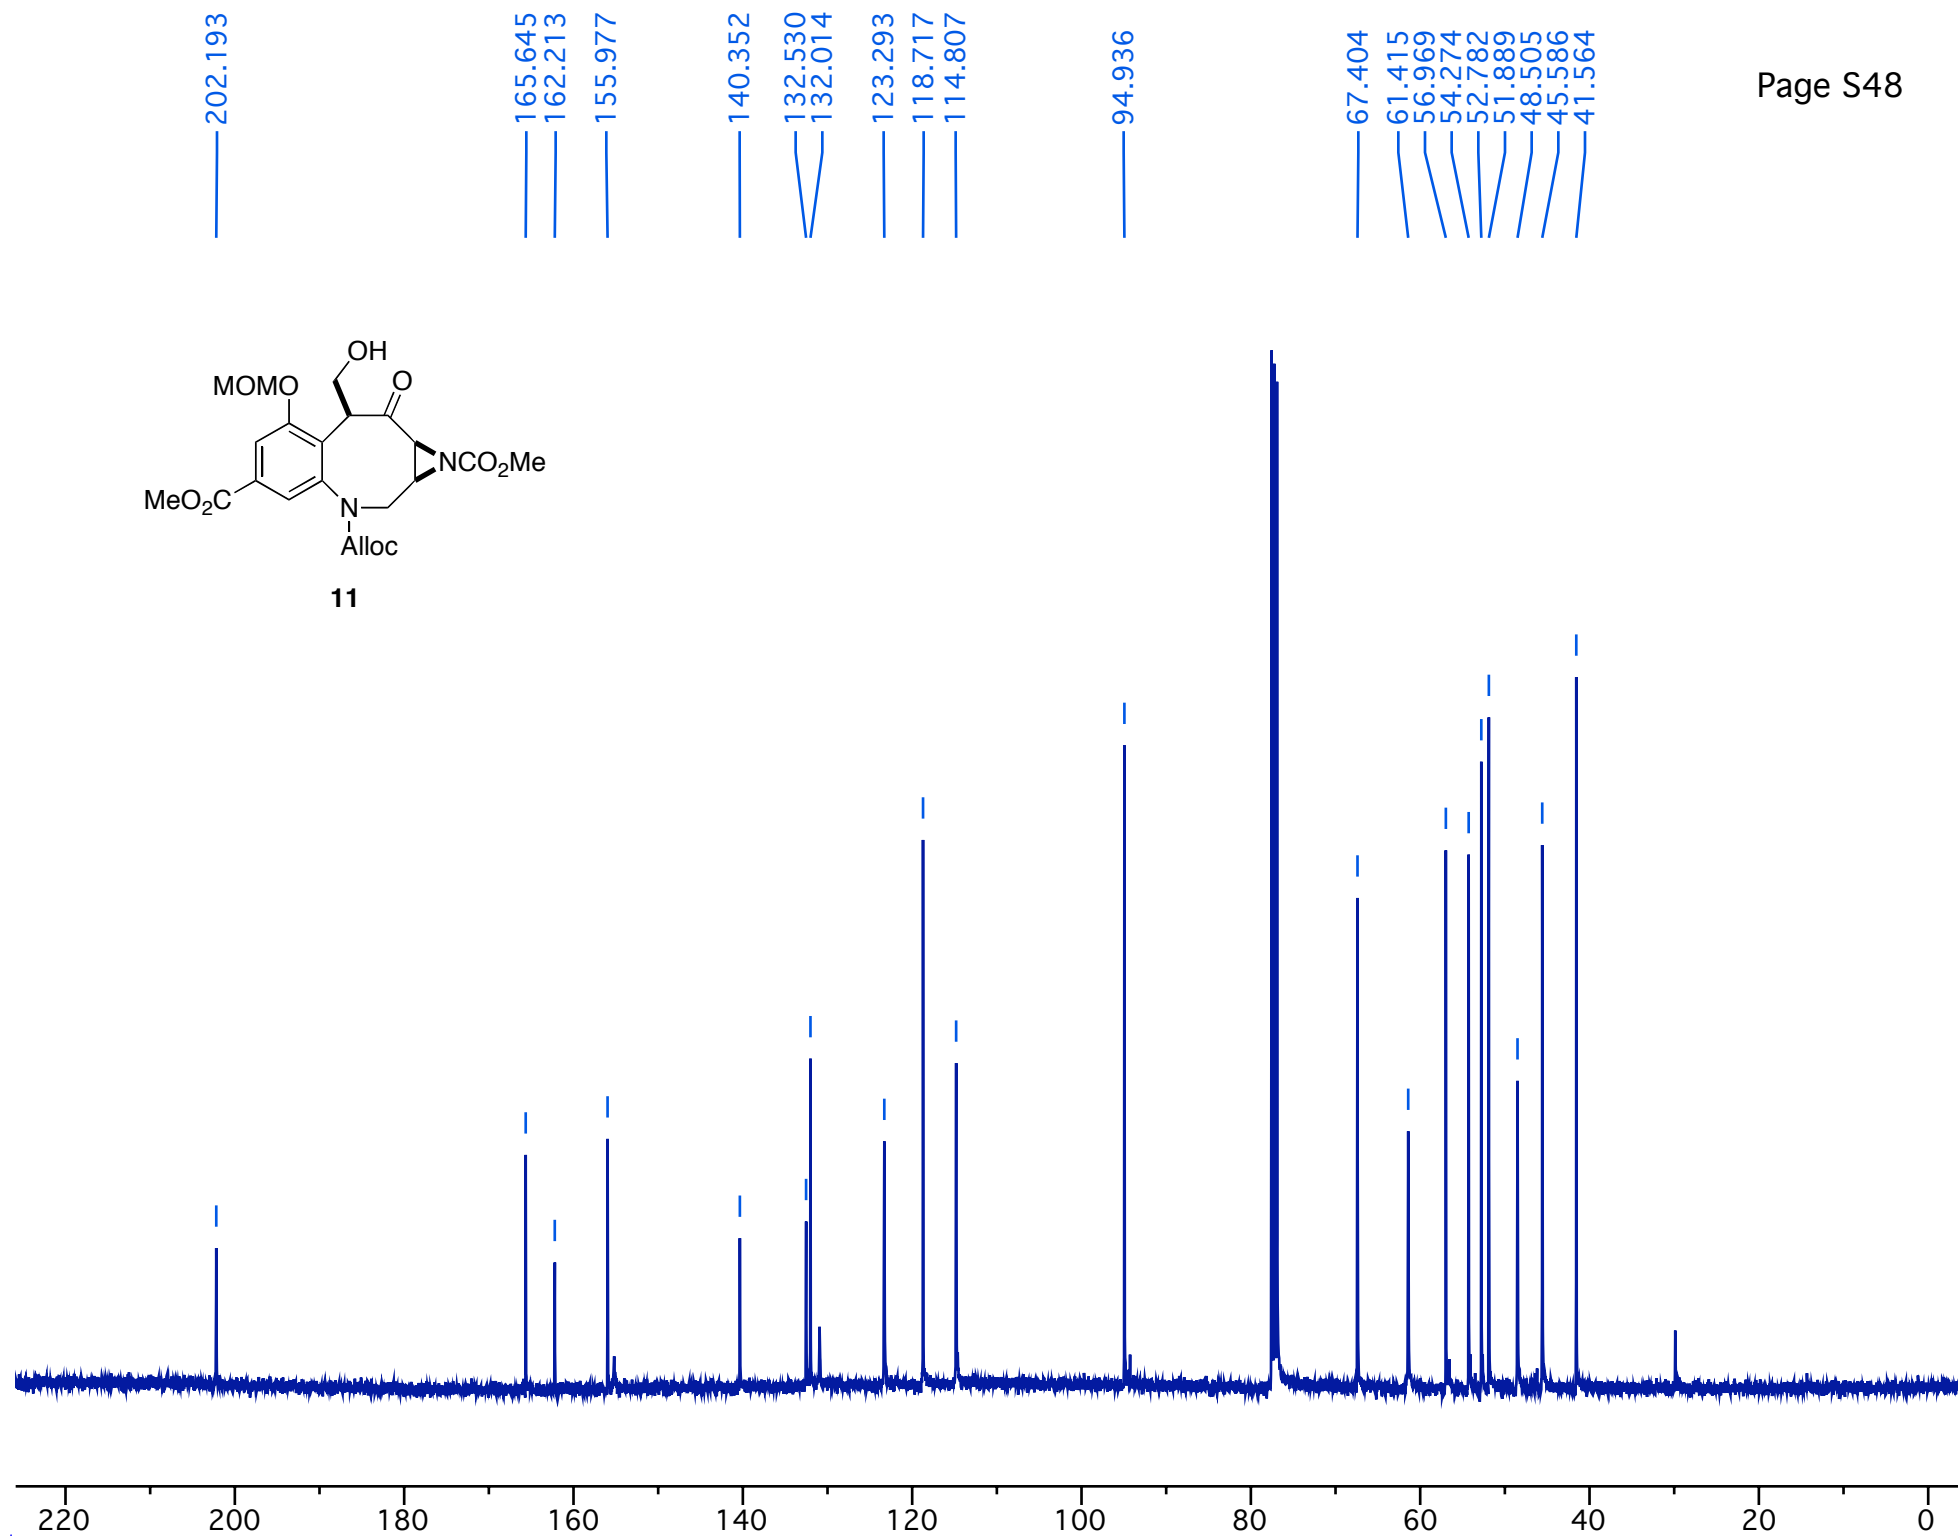



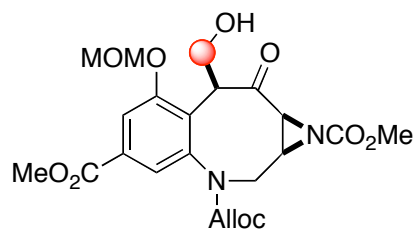

**11**

● = <sup>13</sup>C

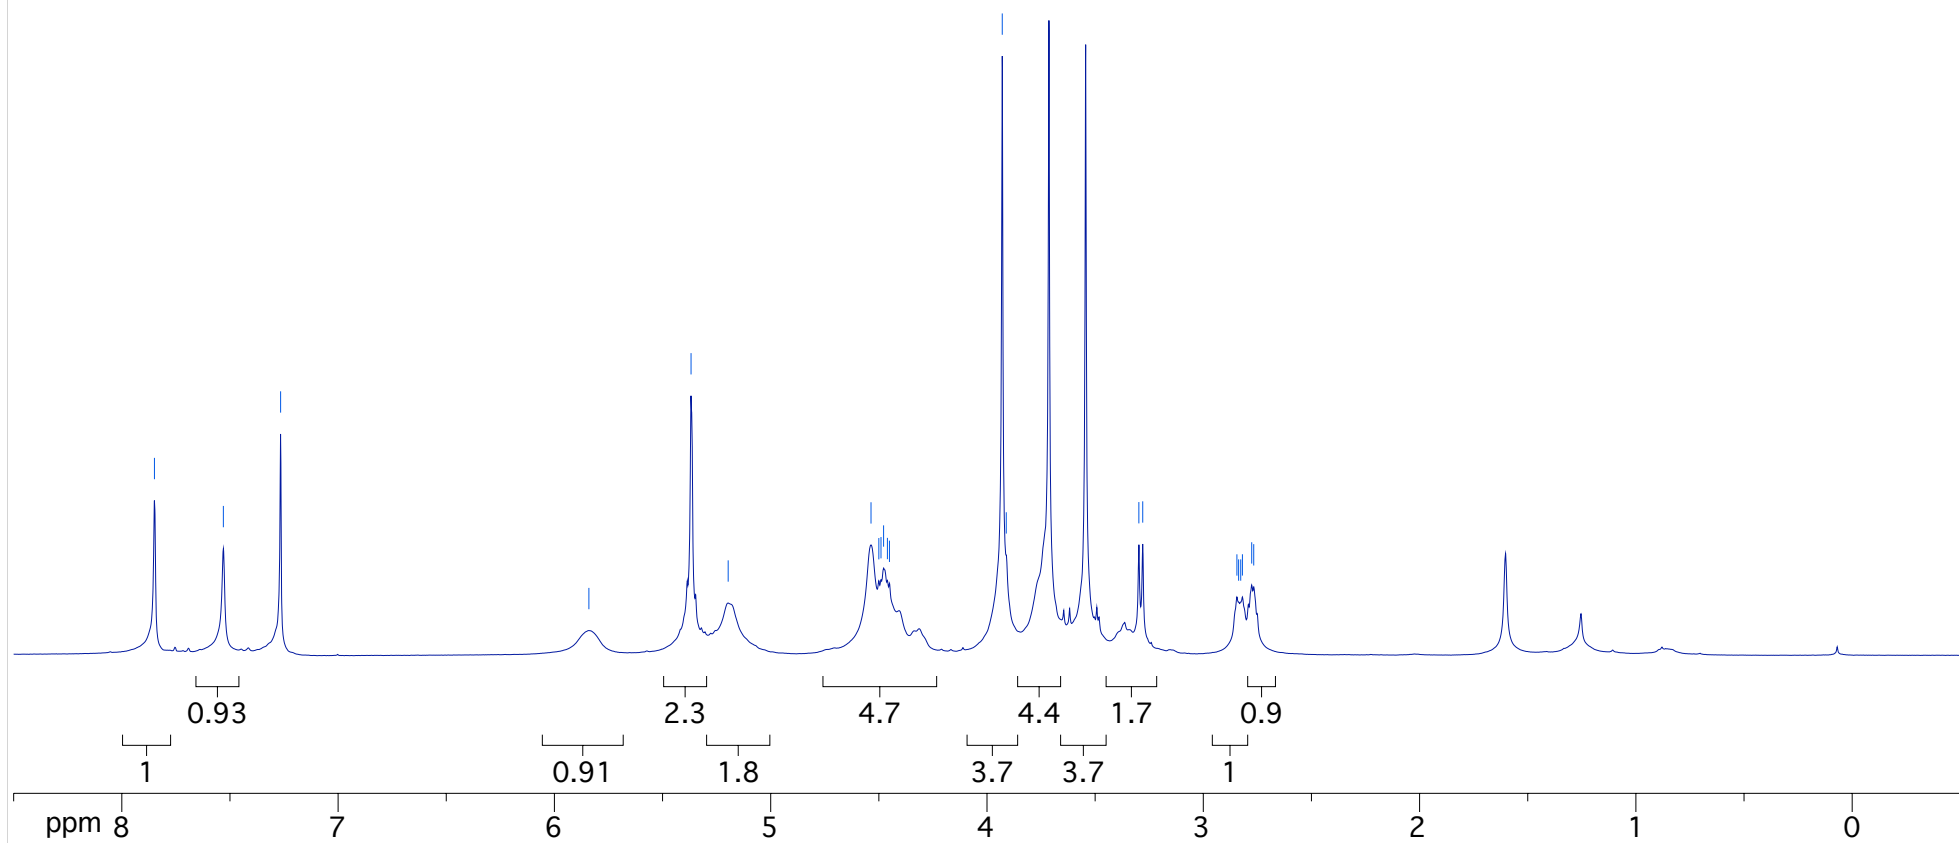

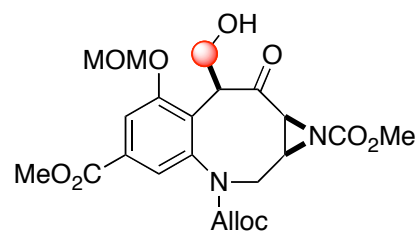

**11**  
● = <sup>13</sup>C

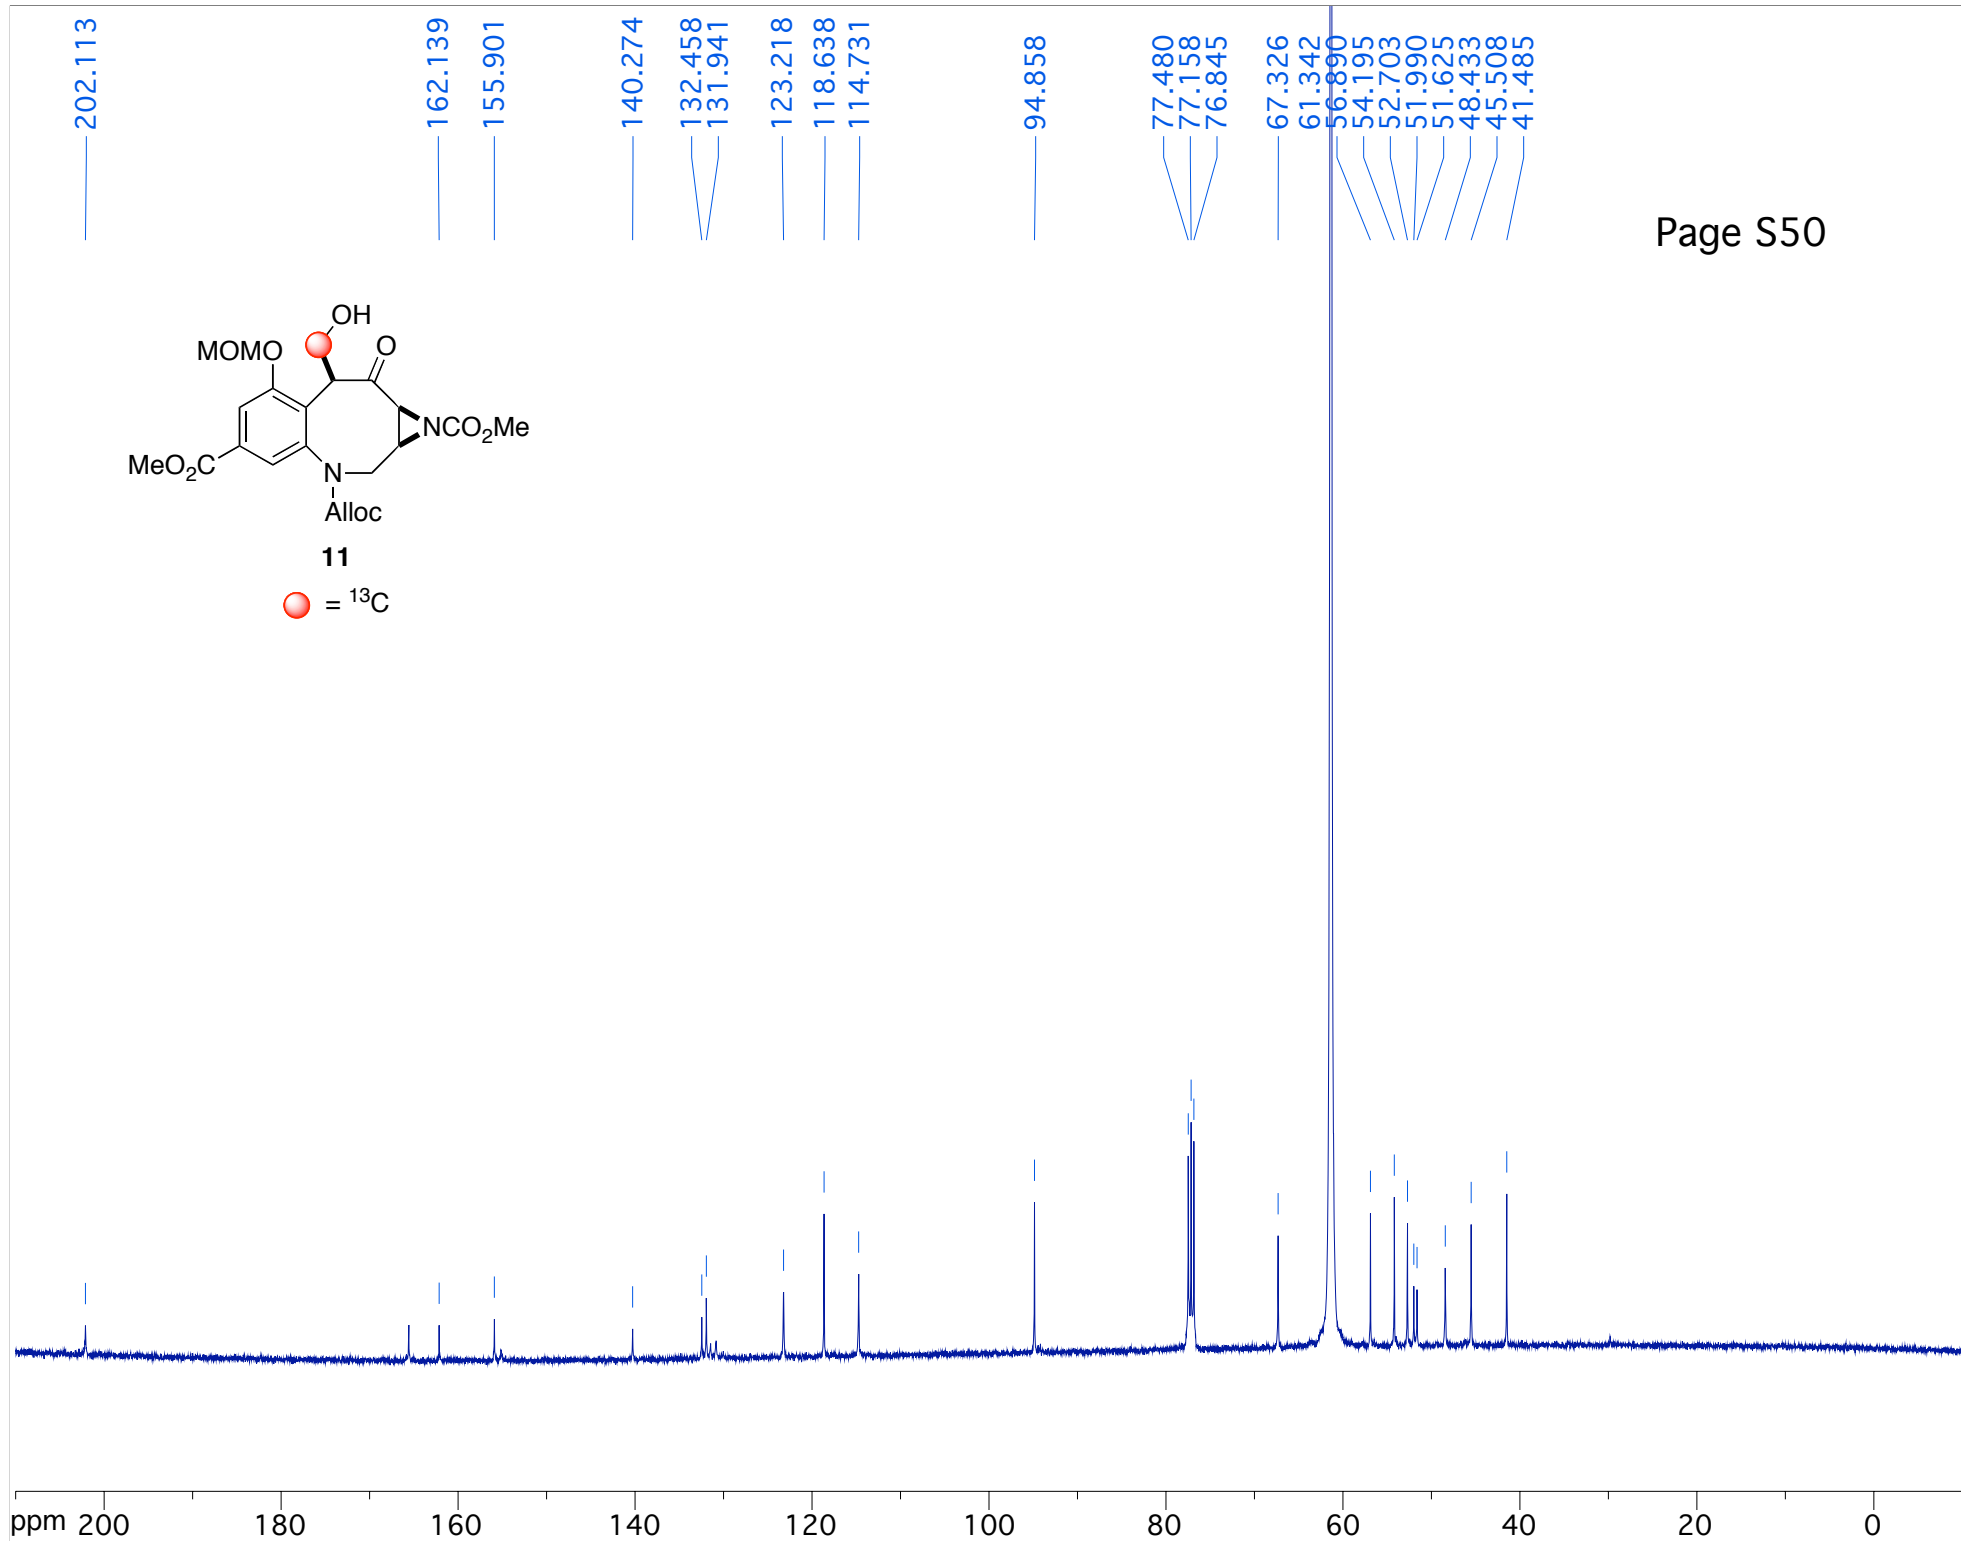

hn-1-408

Pulse Sequence: s2pul

Page S51

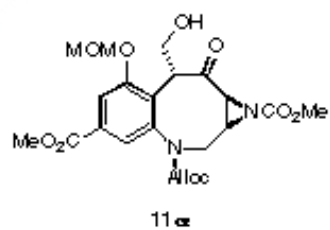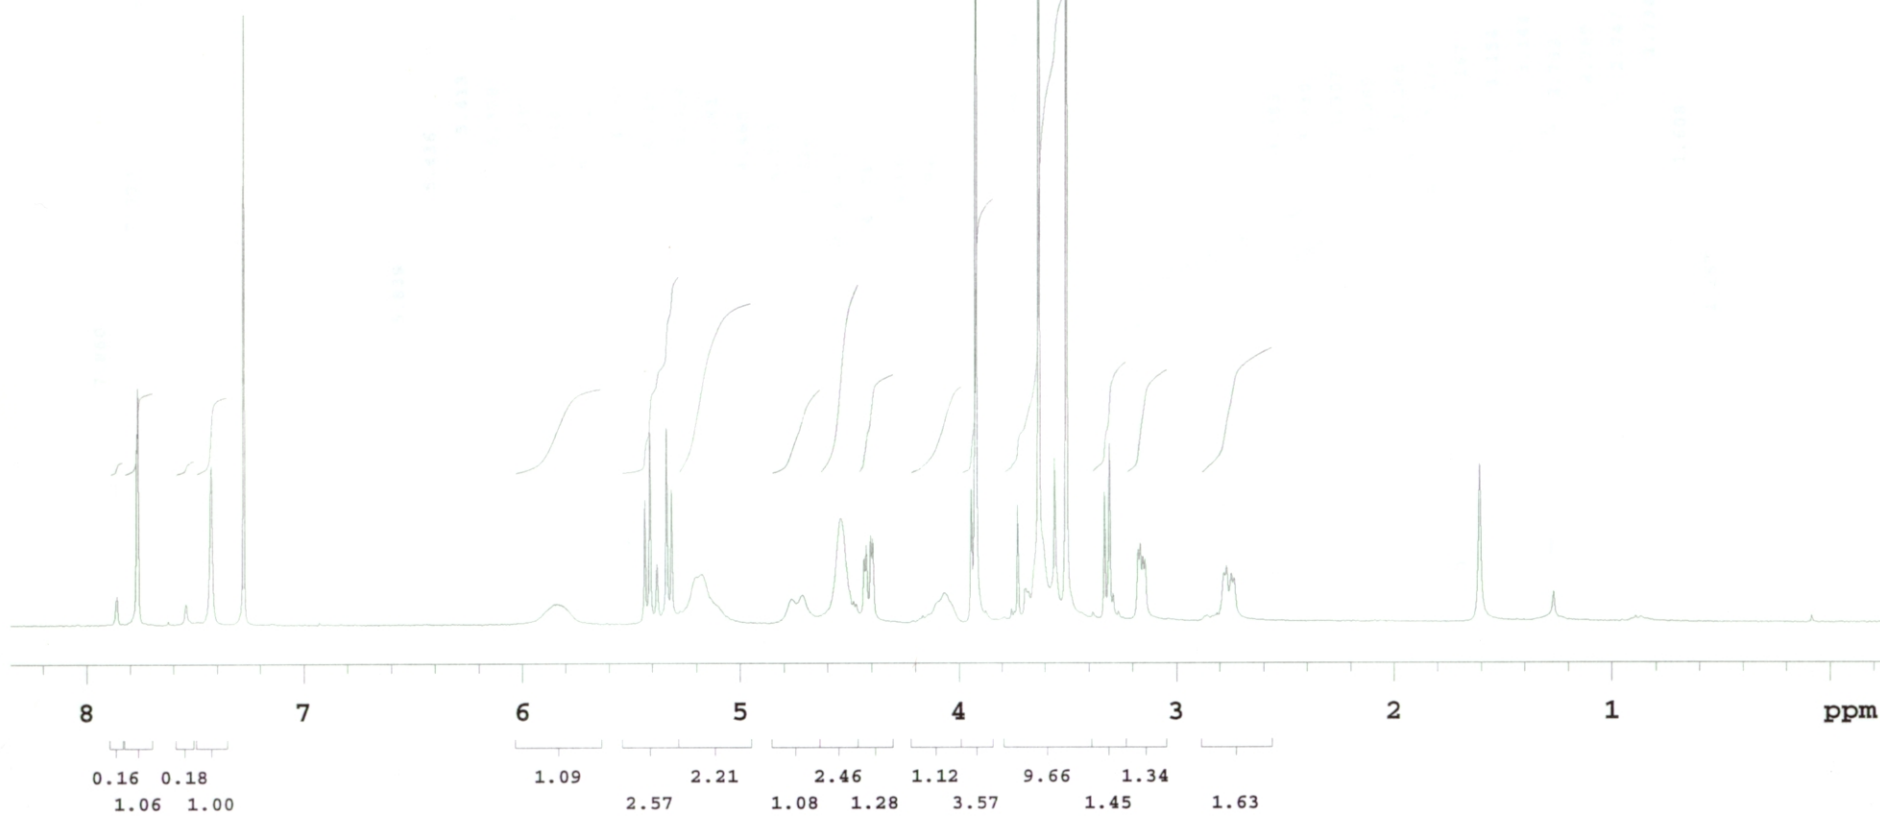

hn-1-408

Pulse Sequence: s2pul

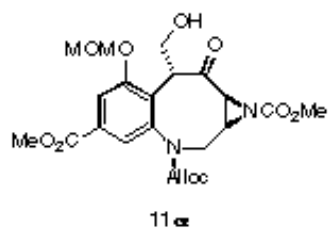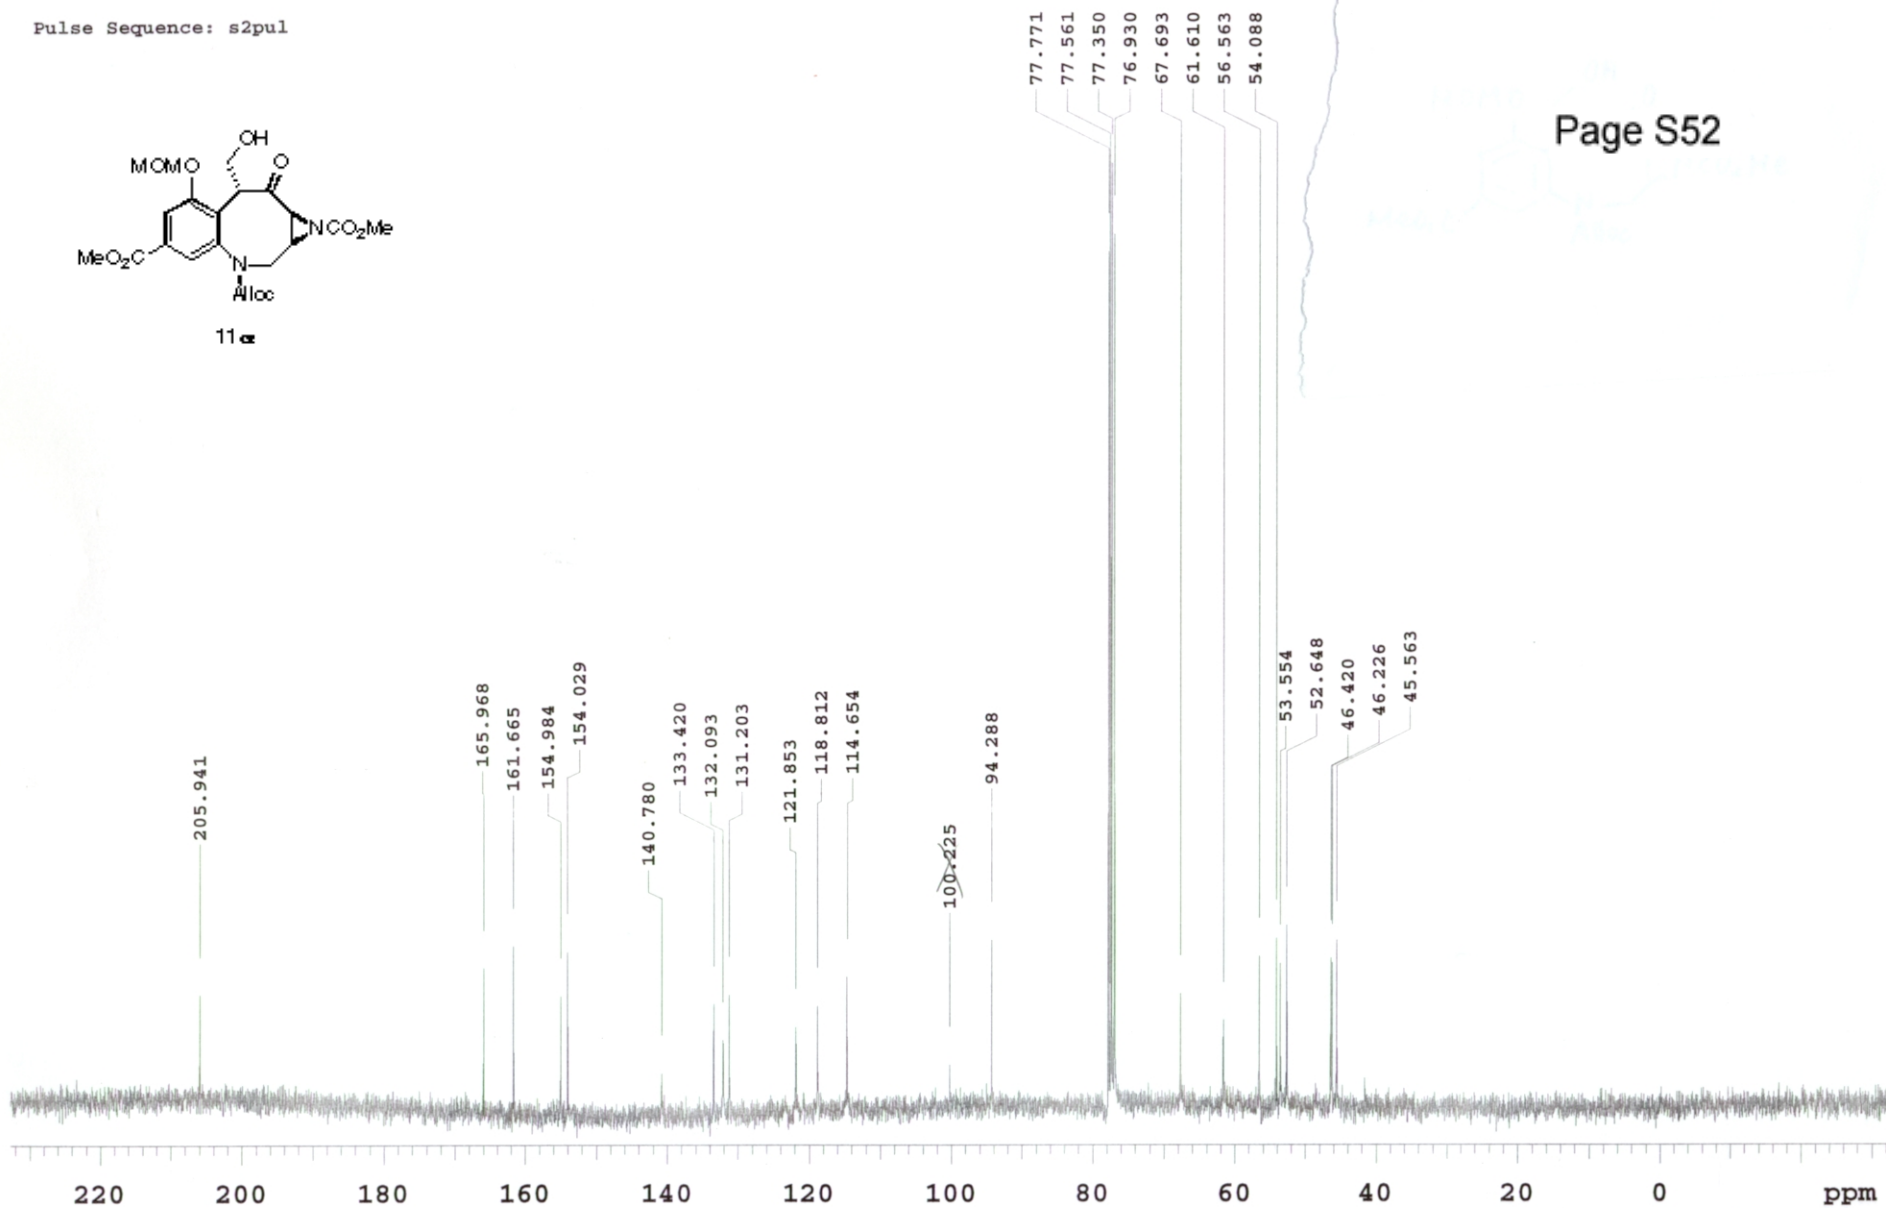

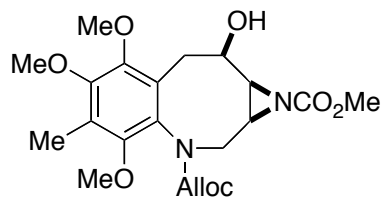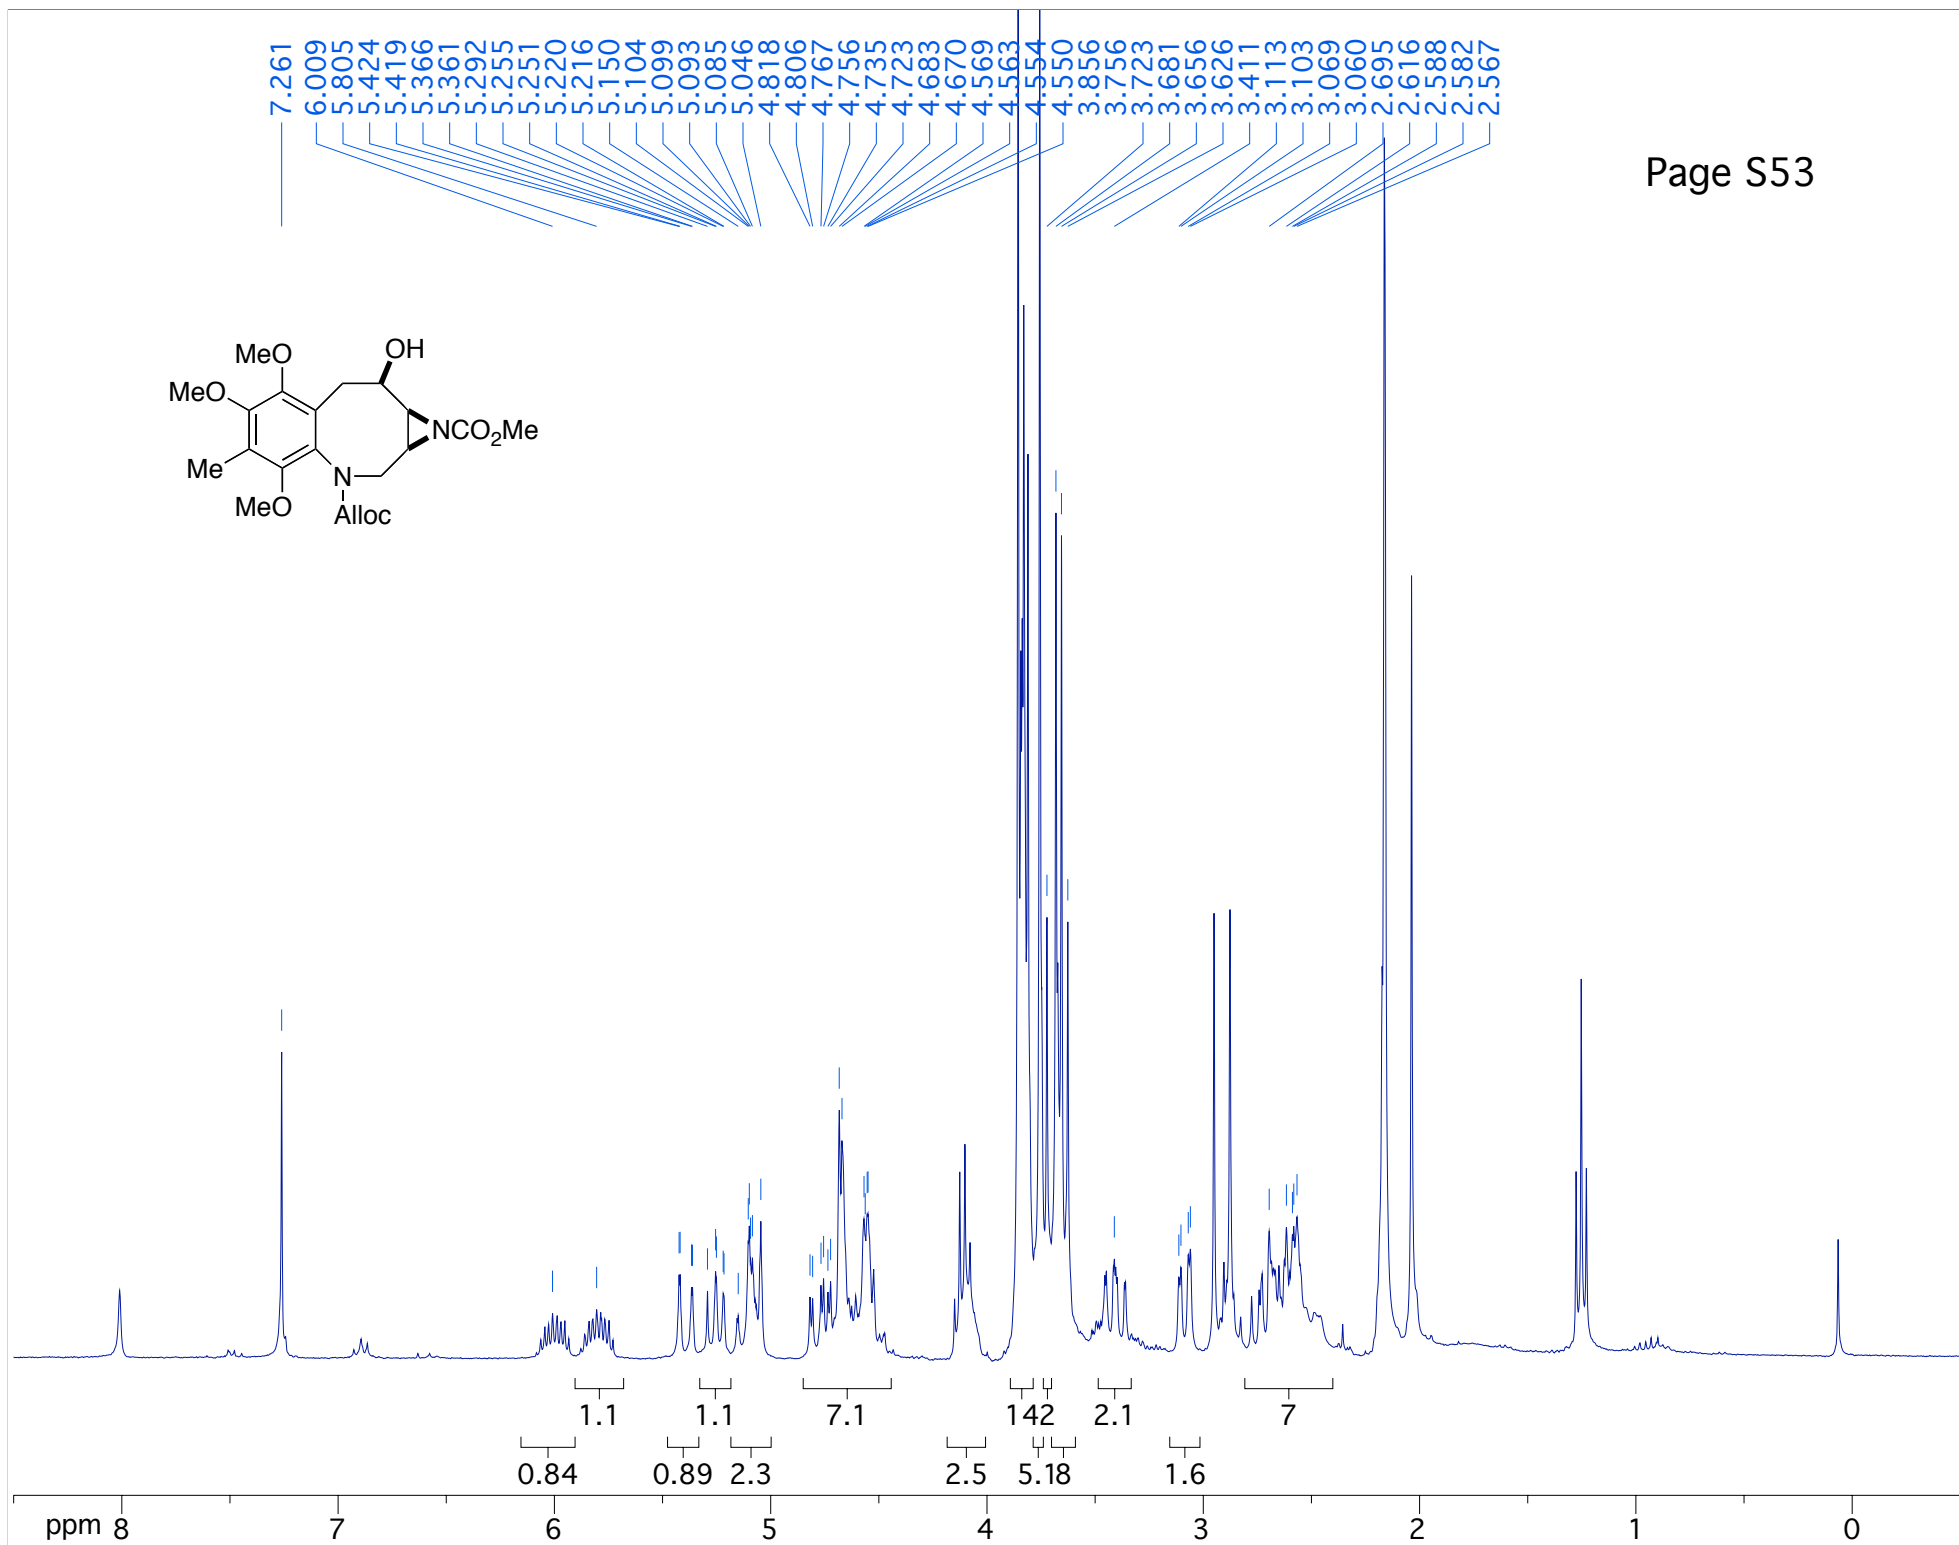

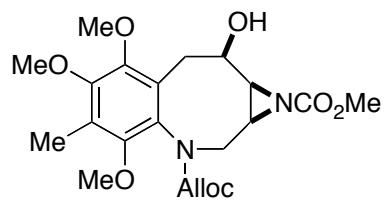

164.336  
164.034  
155.523  
151.955  
151.190  
147.709  
133.123  
133.035  
133.007  
132.855  
132.799  
129.261  
129.042  
125.224  
124.950  
117.592  
117.447

71.361  
70.994  
66.759  
66.407  
61.020  
60.957  
60.800  
60.394  
60.285  
60.216  
54.278  
54.111  
47.815  
47.733  
46.722  
46.669  
42.046  
41.732  
29.189  
29.061

9.956  
9.880  
9.838  
9.738

Page S54

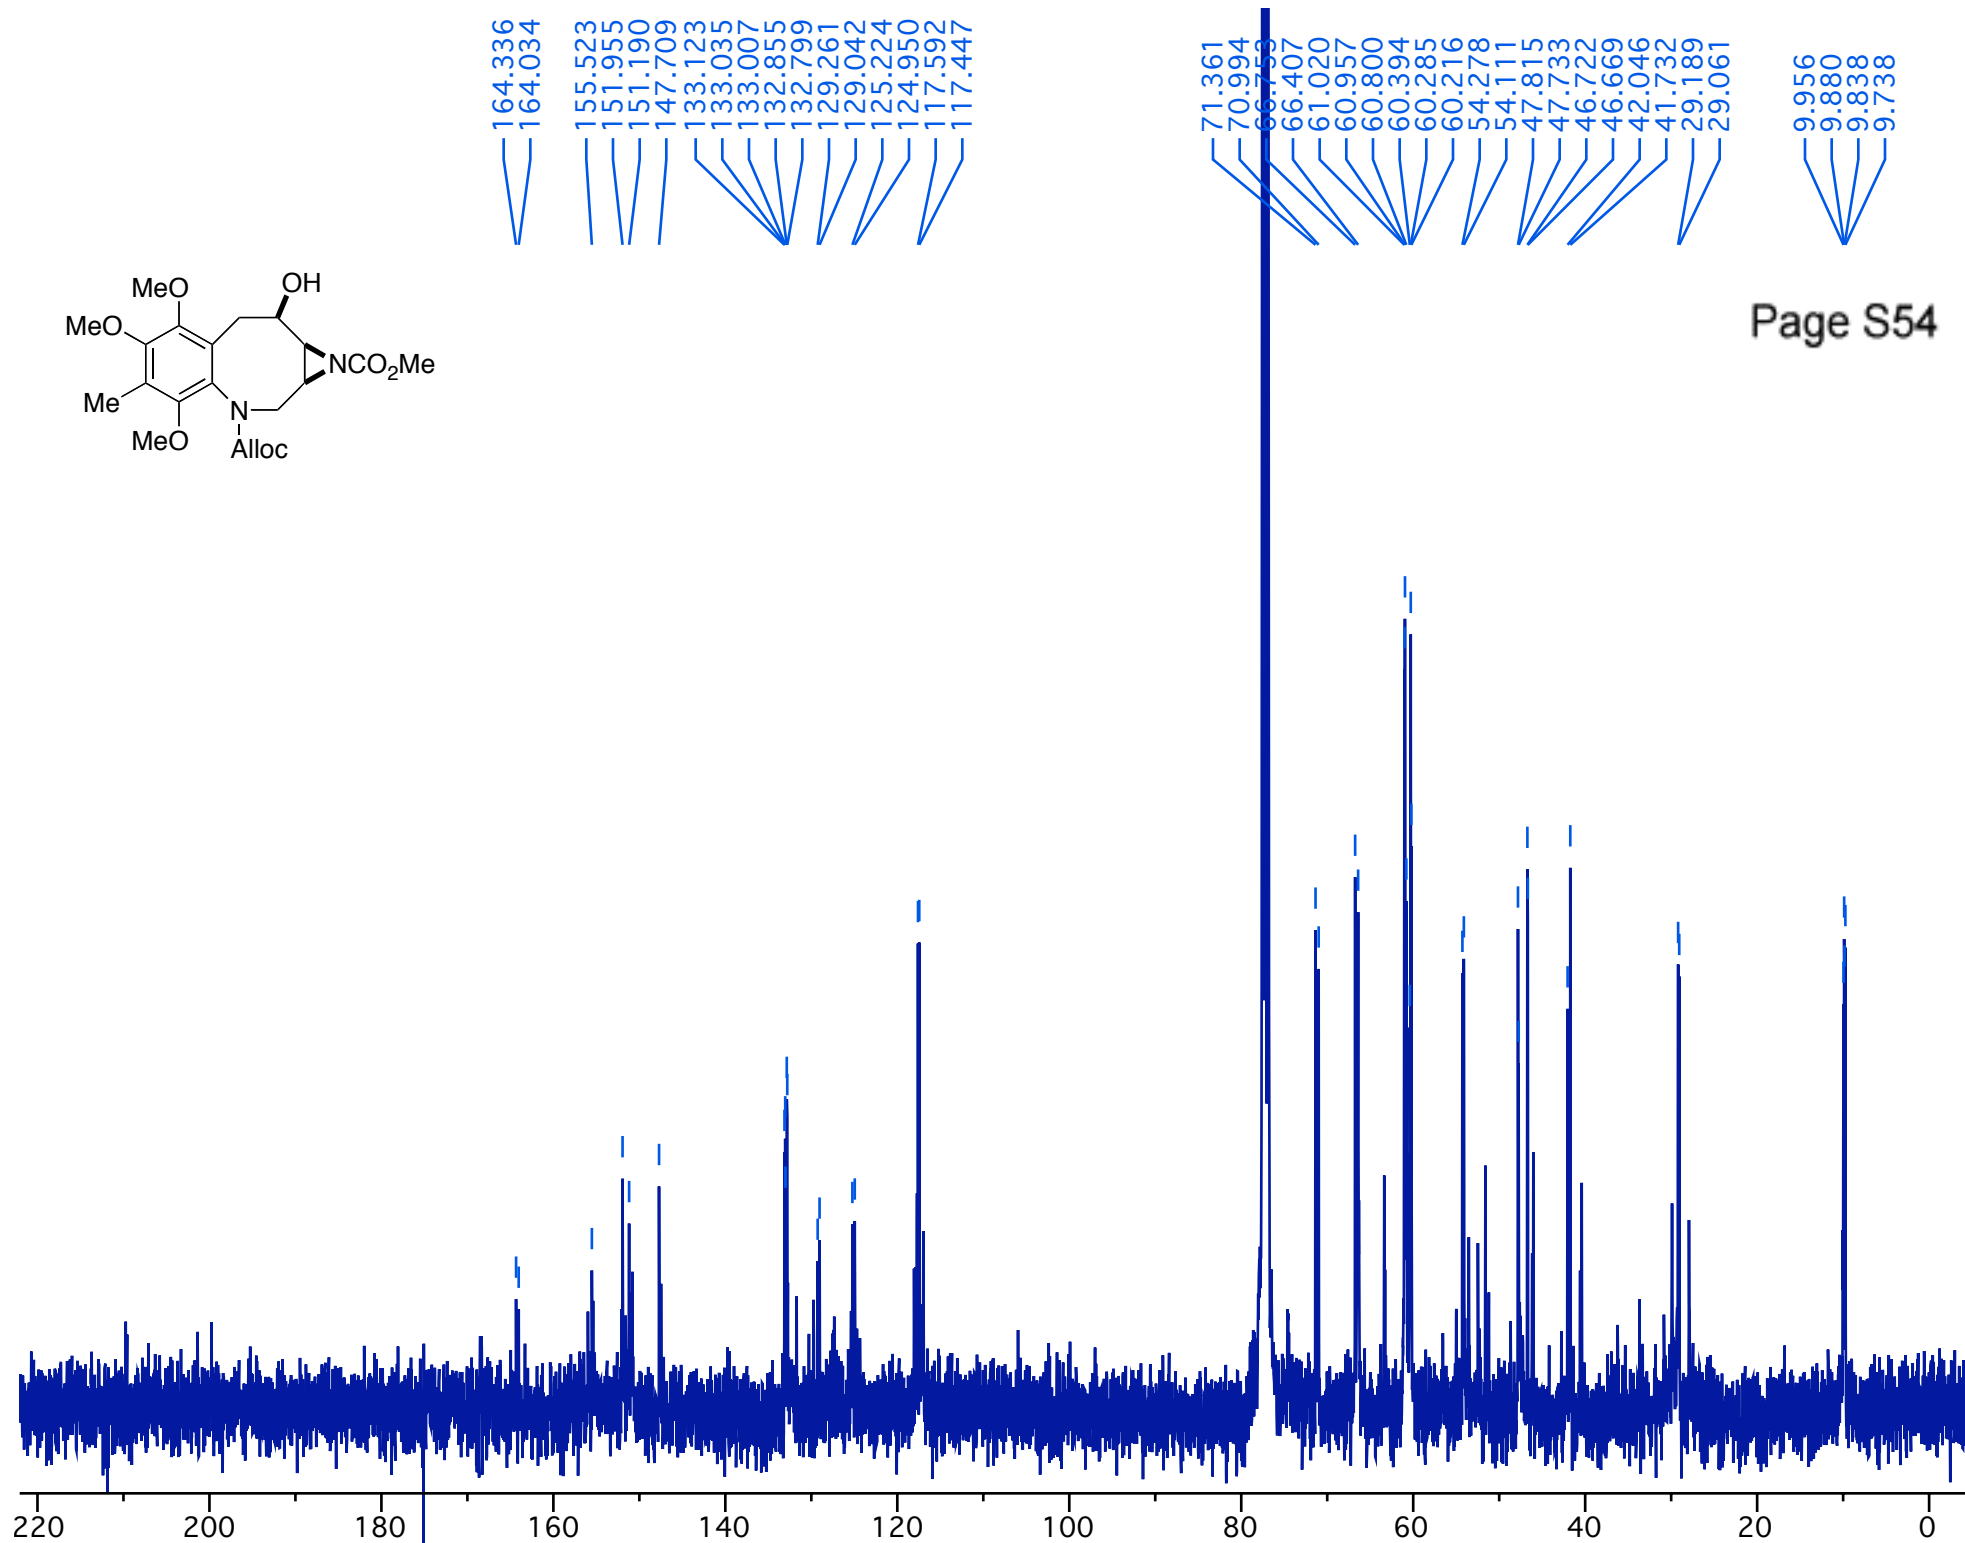

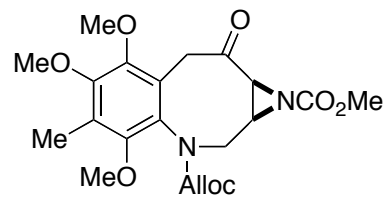

13

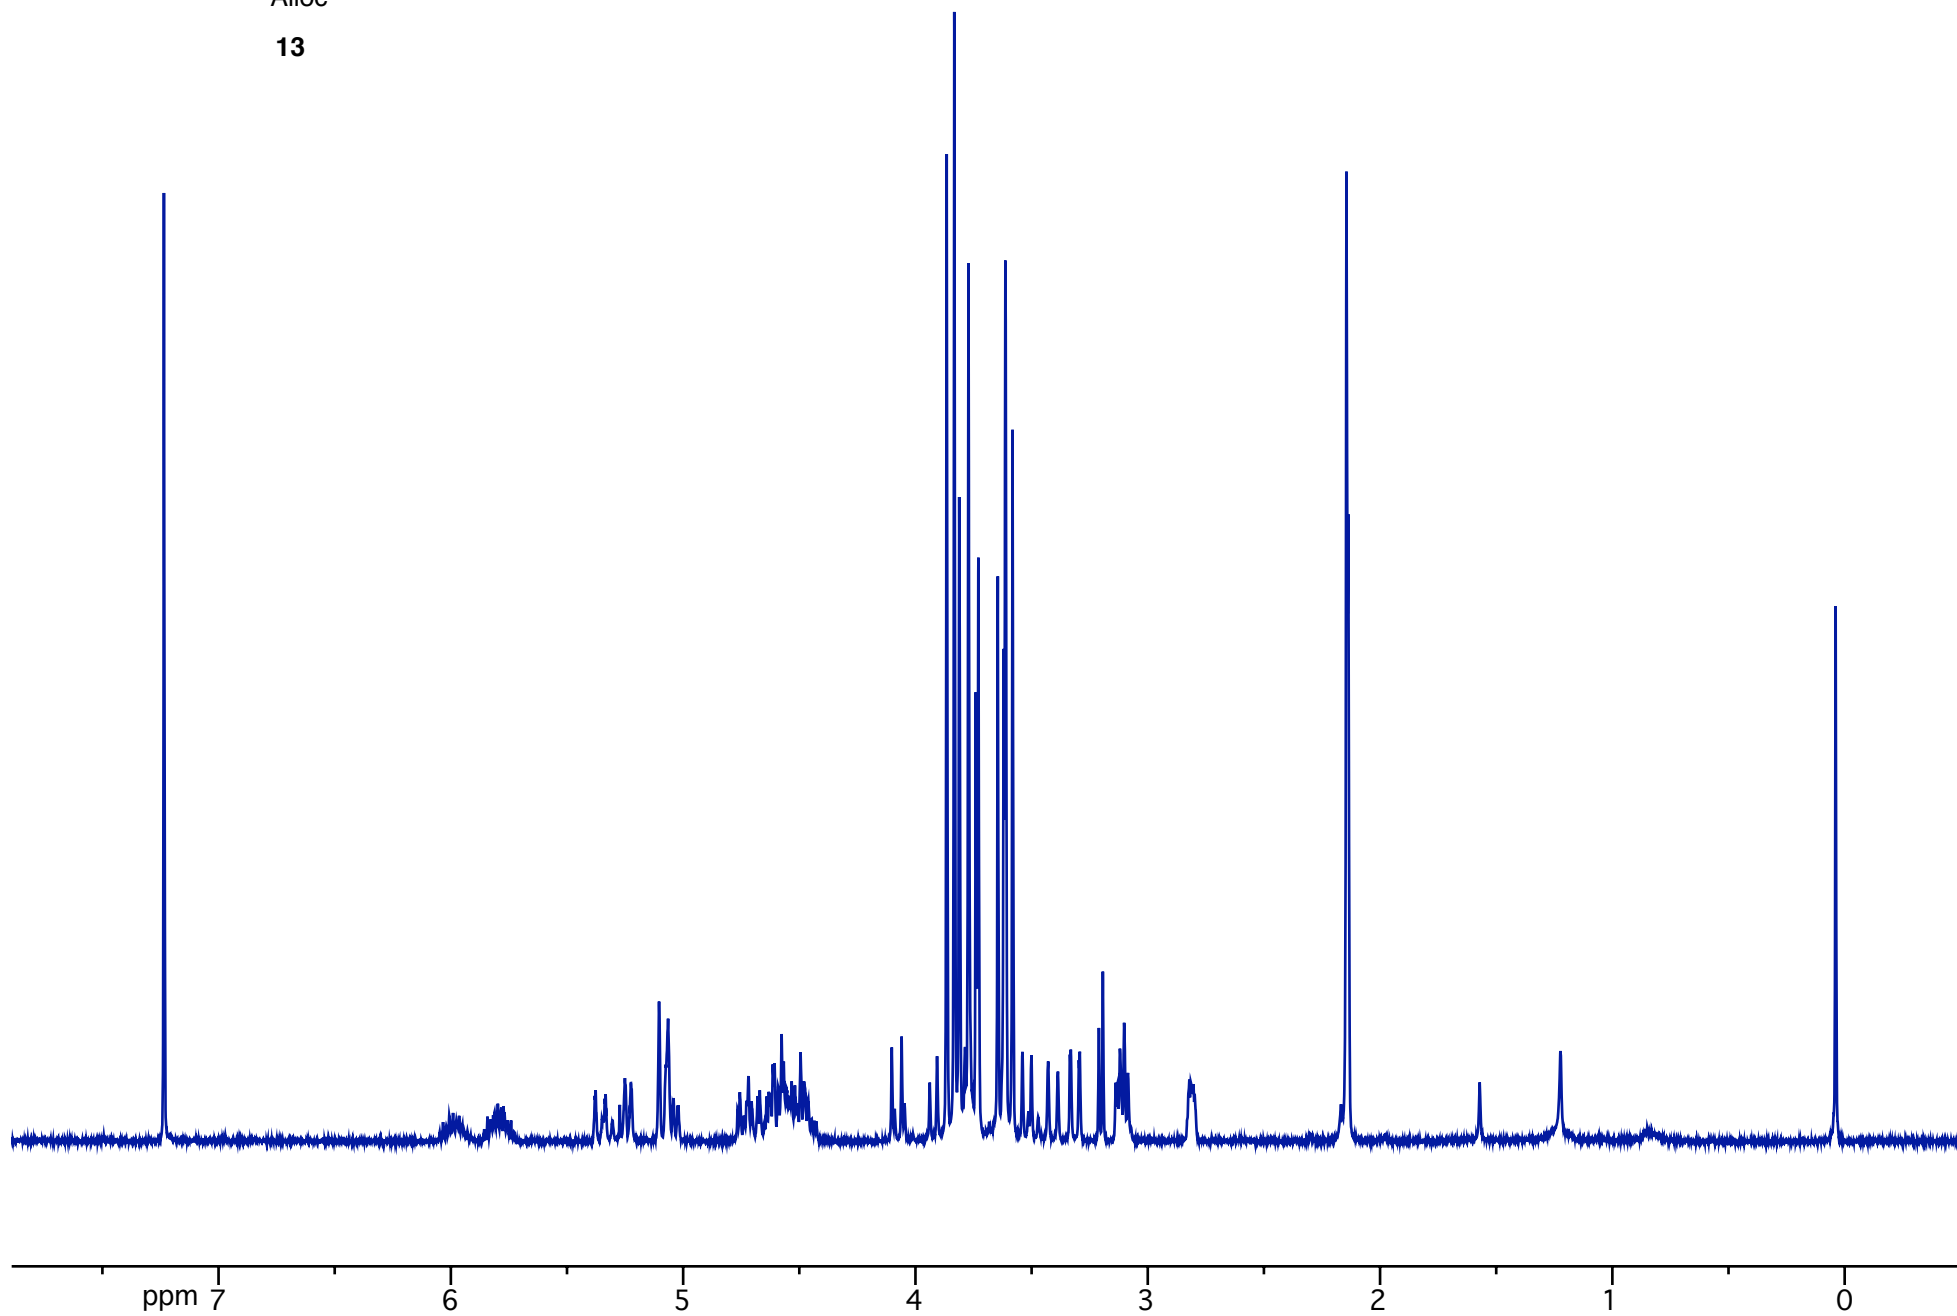

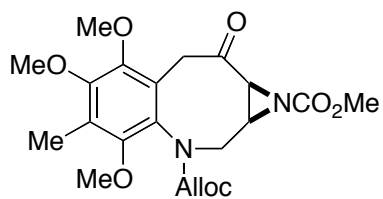

**13**

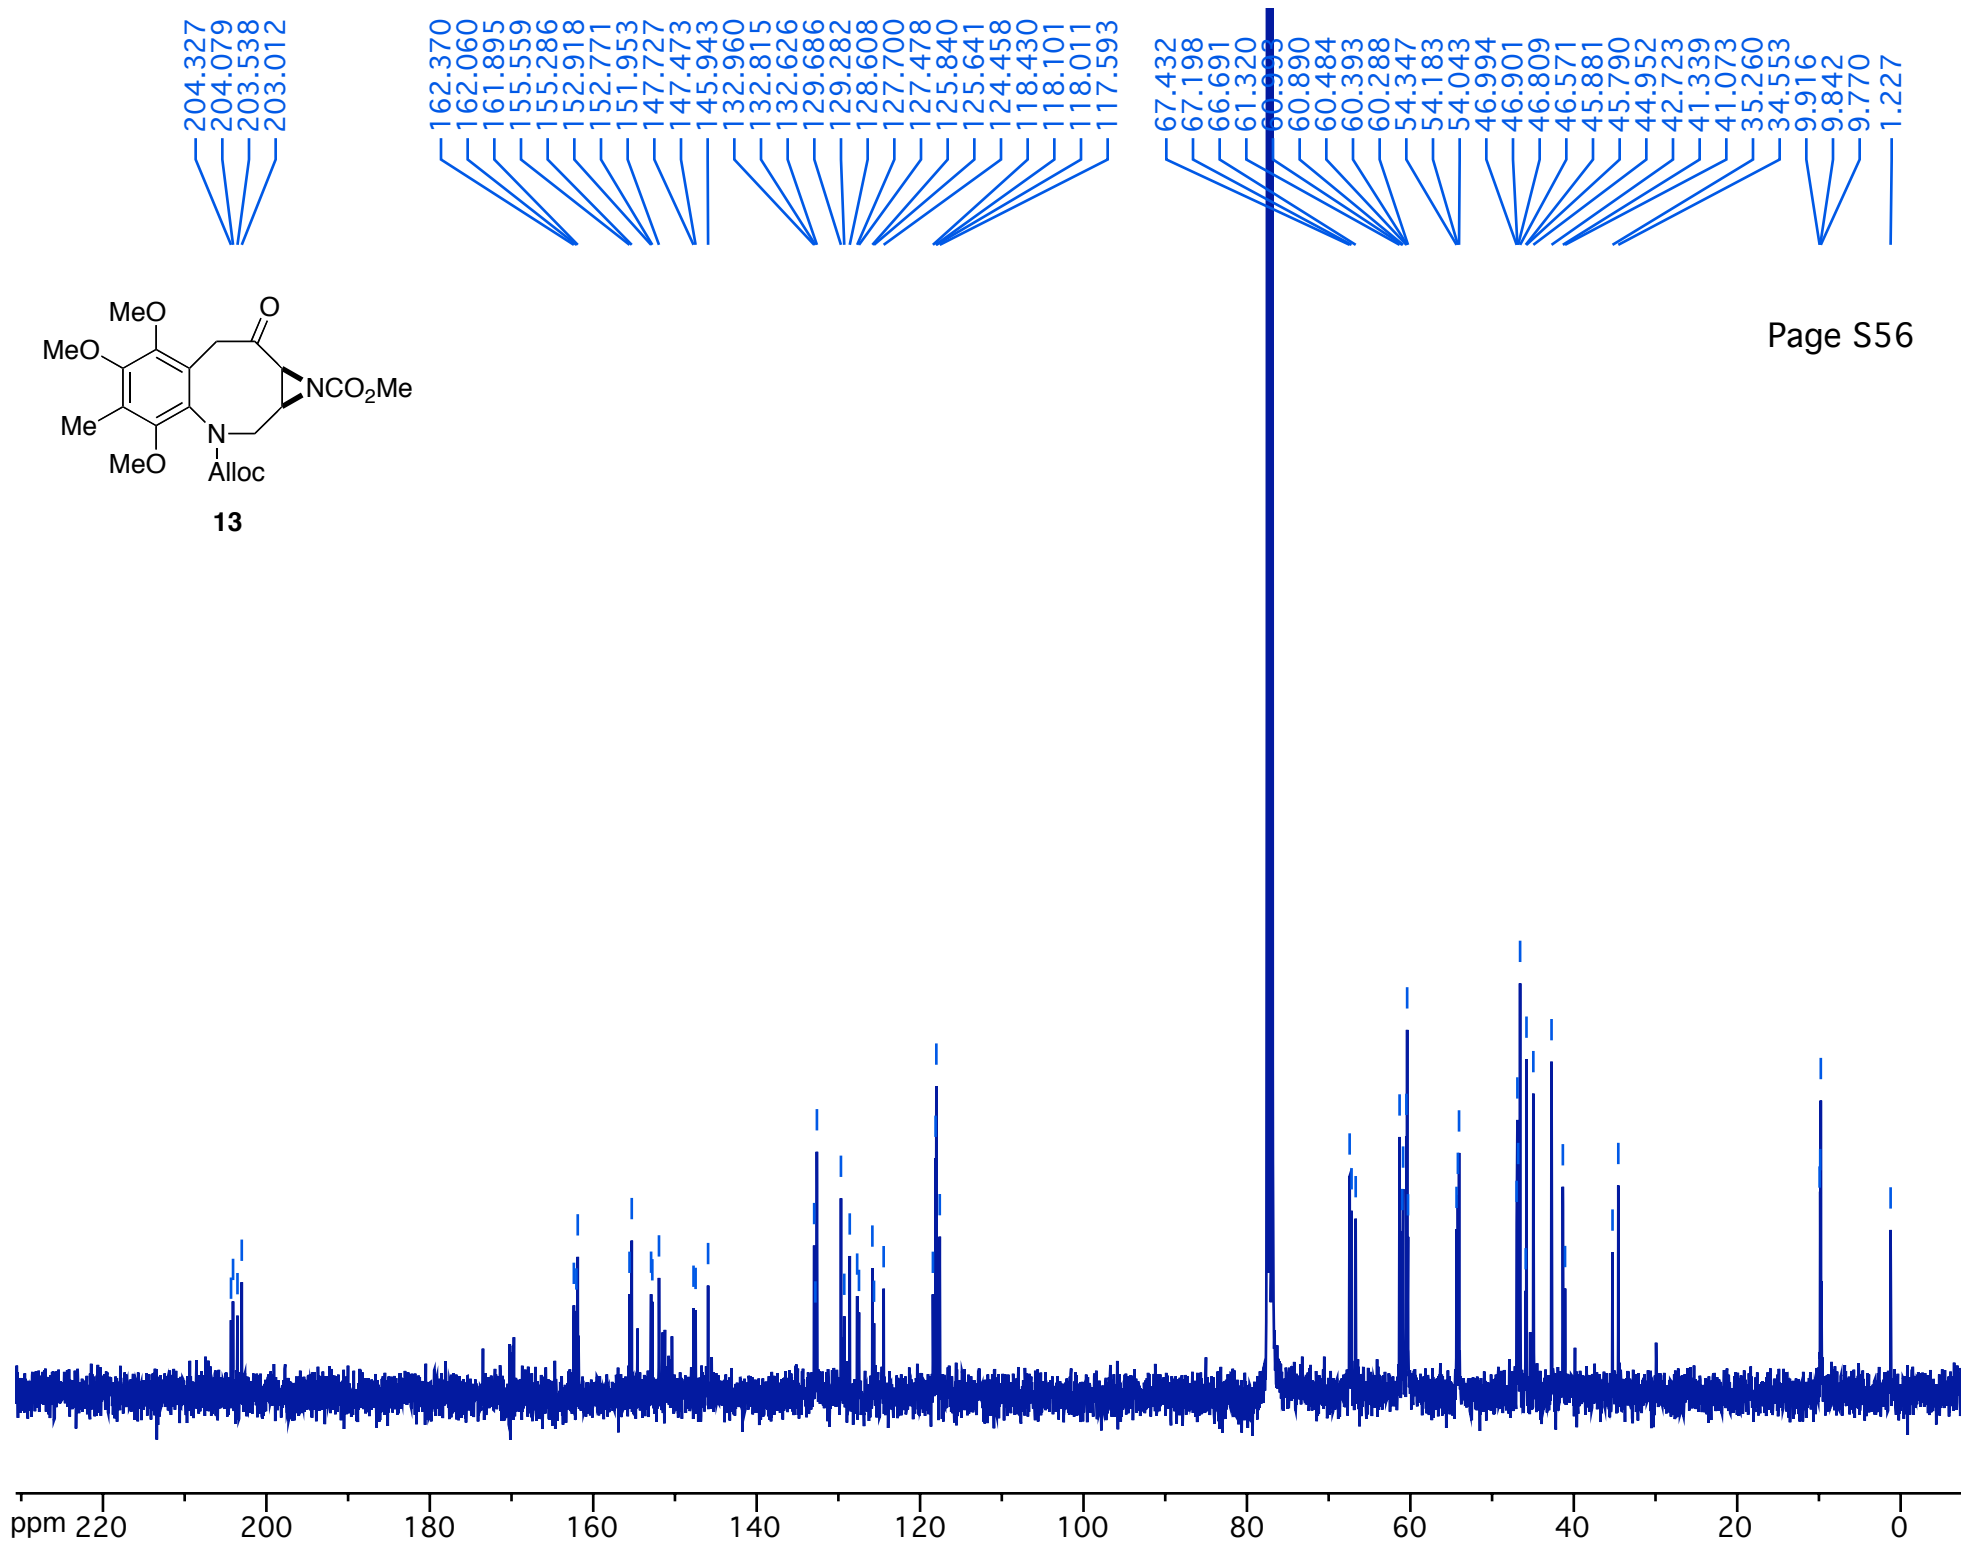



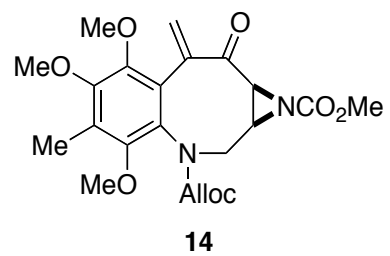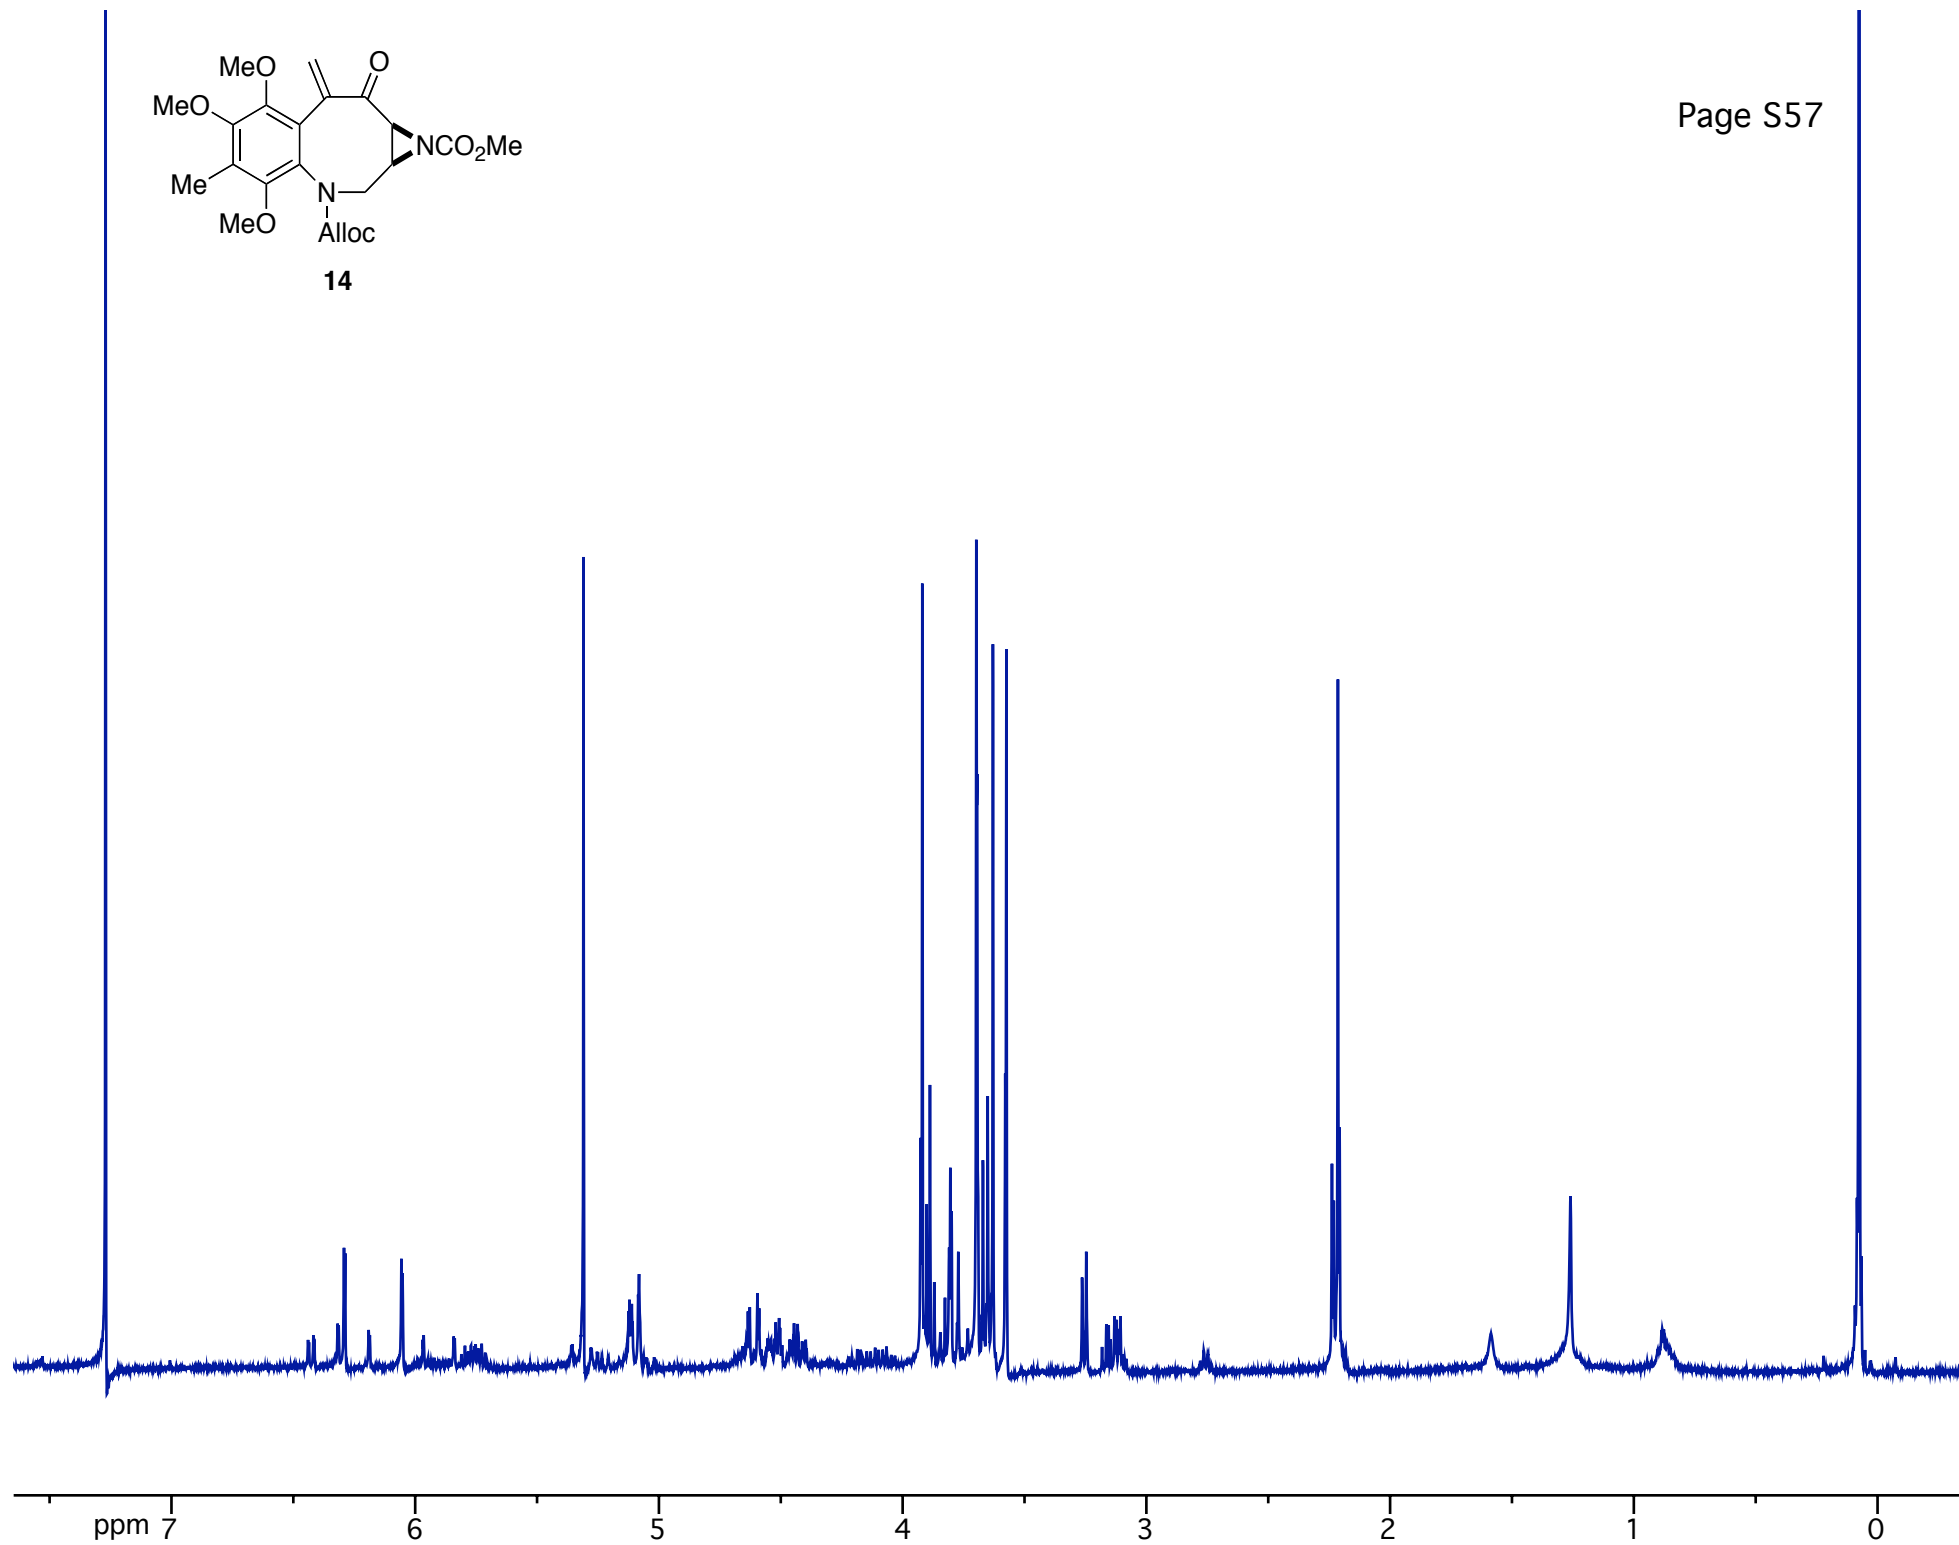

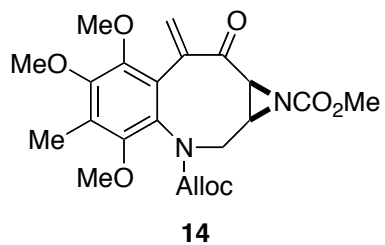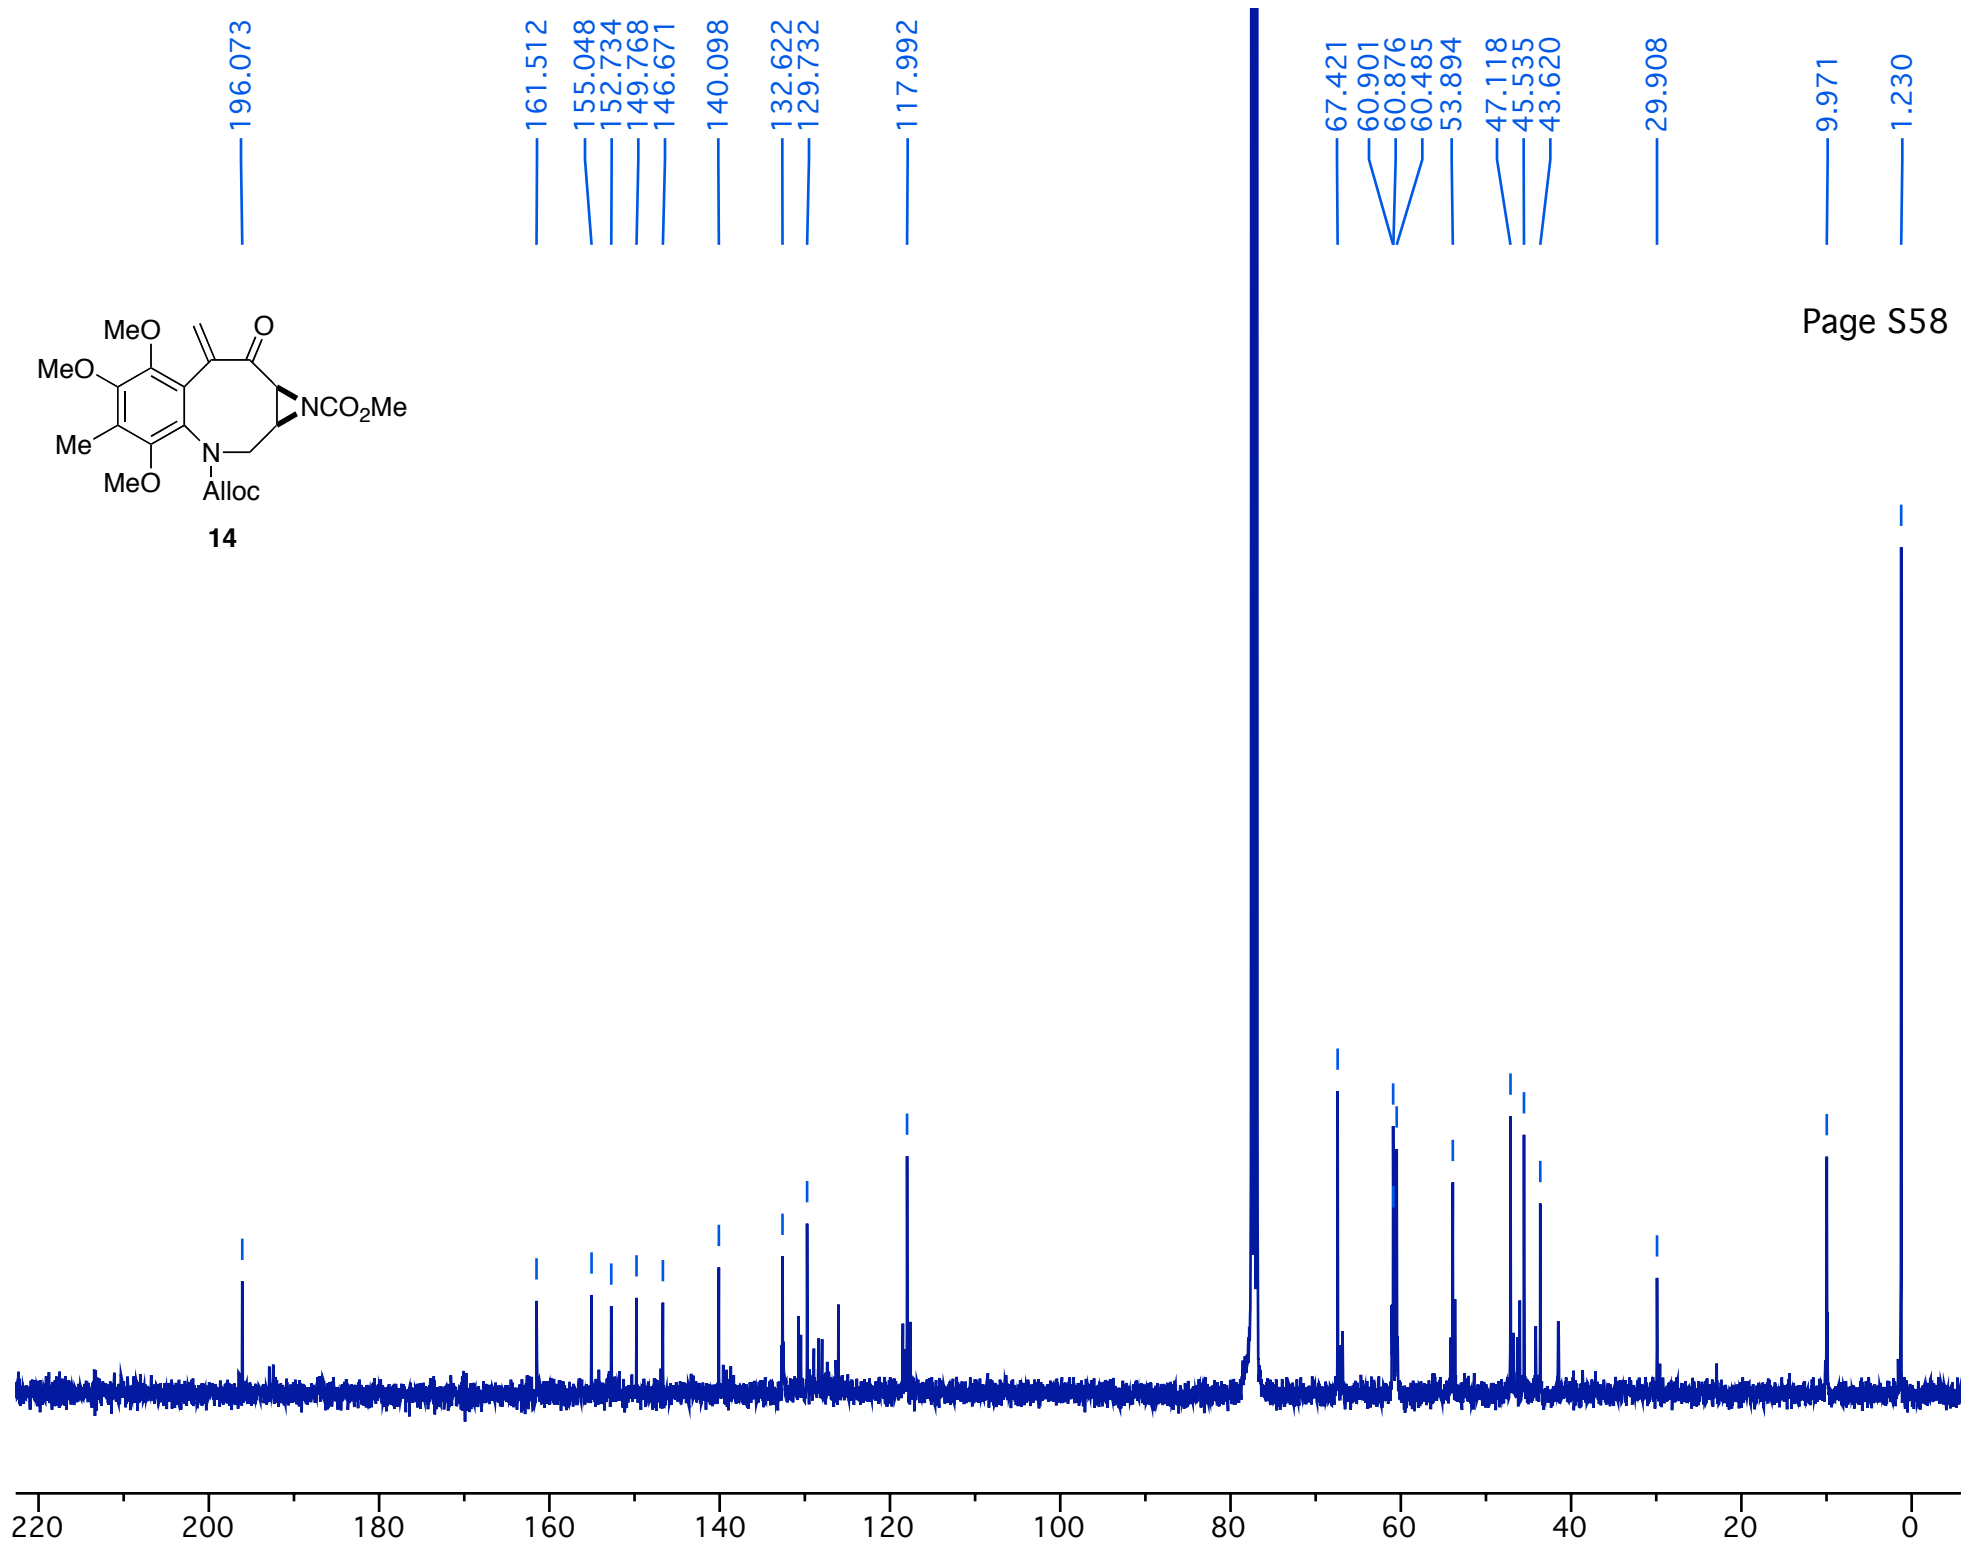

Supplement: NIHMS62996-supplement-2File002.pdf [file NIHMS62996-supplement-2File002.pdf]
